# Supplementary material for: A comprehensive atlas of nuclear sequences of mitochondrial origin (NUMT) inserted into the pig genome
Source: Springer Nature journal article supplement (doi:10.1186/s12711-024-00930-6), 2024-09-16

## Additional file 4

### **A comprehensive atlas of nuclear sequences of mitochondrial origin (NUMTs) inserted into the pig genome**

Matteo Bolner, Samuele Bovo, Mohamad Ballan, Giuseppina Schiavo, Valeria Taurisano, Anisa Ribani, Francesca Bertolini and Luca Fontanesi

### **Table of content**

#### **Additional file 4: Figure S7. Phylogenetic trees obtained for all NUMT regions (n. 178) for which a NUMT sequence was longer than 150 bp.**

Each tree was computed from the longest NUMT sequence in the region. The title of the tree reports the name of the NUMT region. The X axis of each tree represents the branch length. Polymorphic NUMT regions are colored red, and fixed NUMT regions are colored blue. The NUMT nuclear sequence is compared with the corresponding sequences in the mitochondrial DNA of several species (the other branches). The posterior probability computed by BEAST is reported along each node in the tree, and ranges from 0 to 100.





SSC3\_REGION\_20

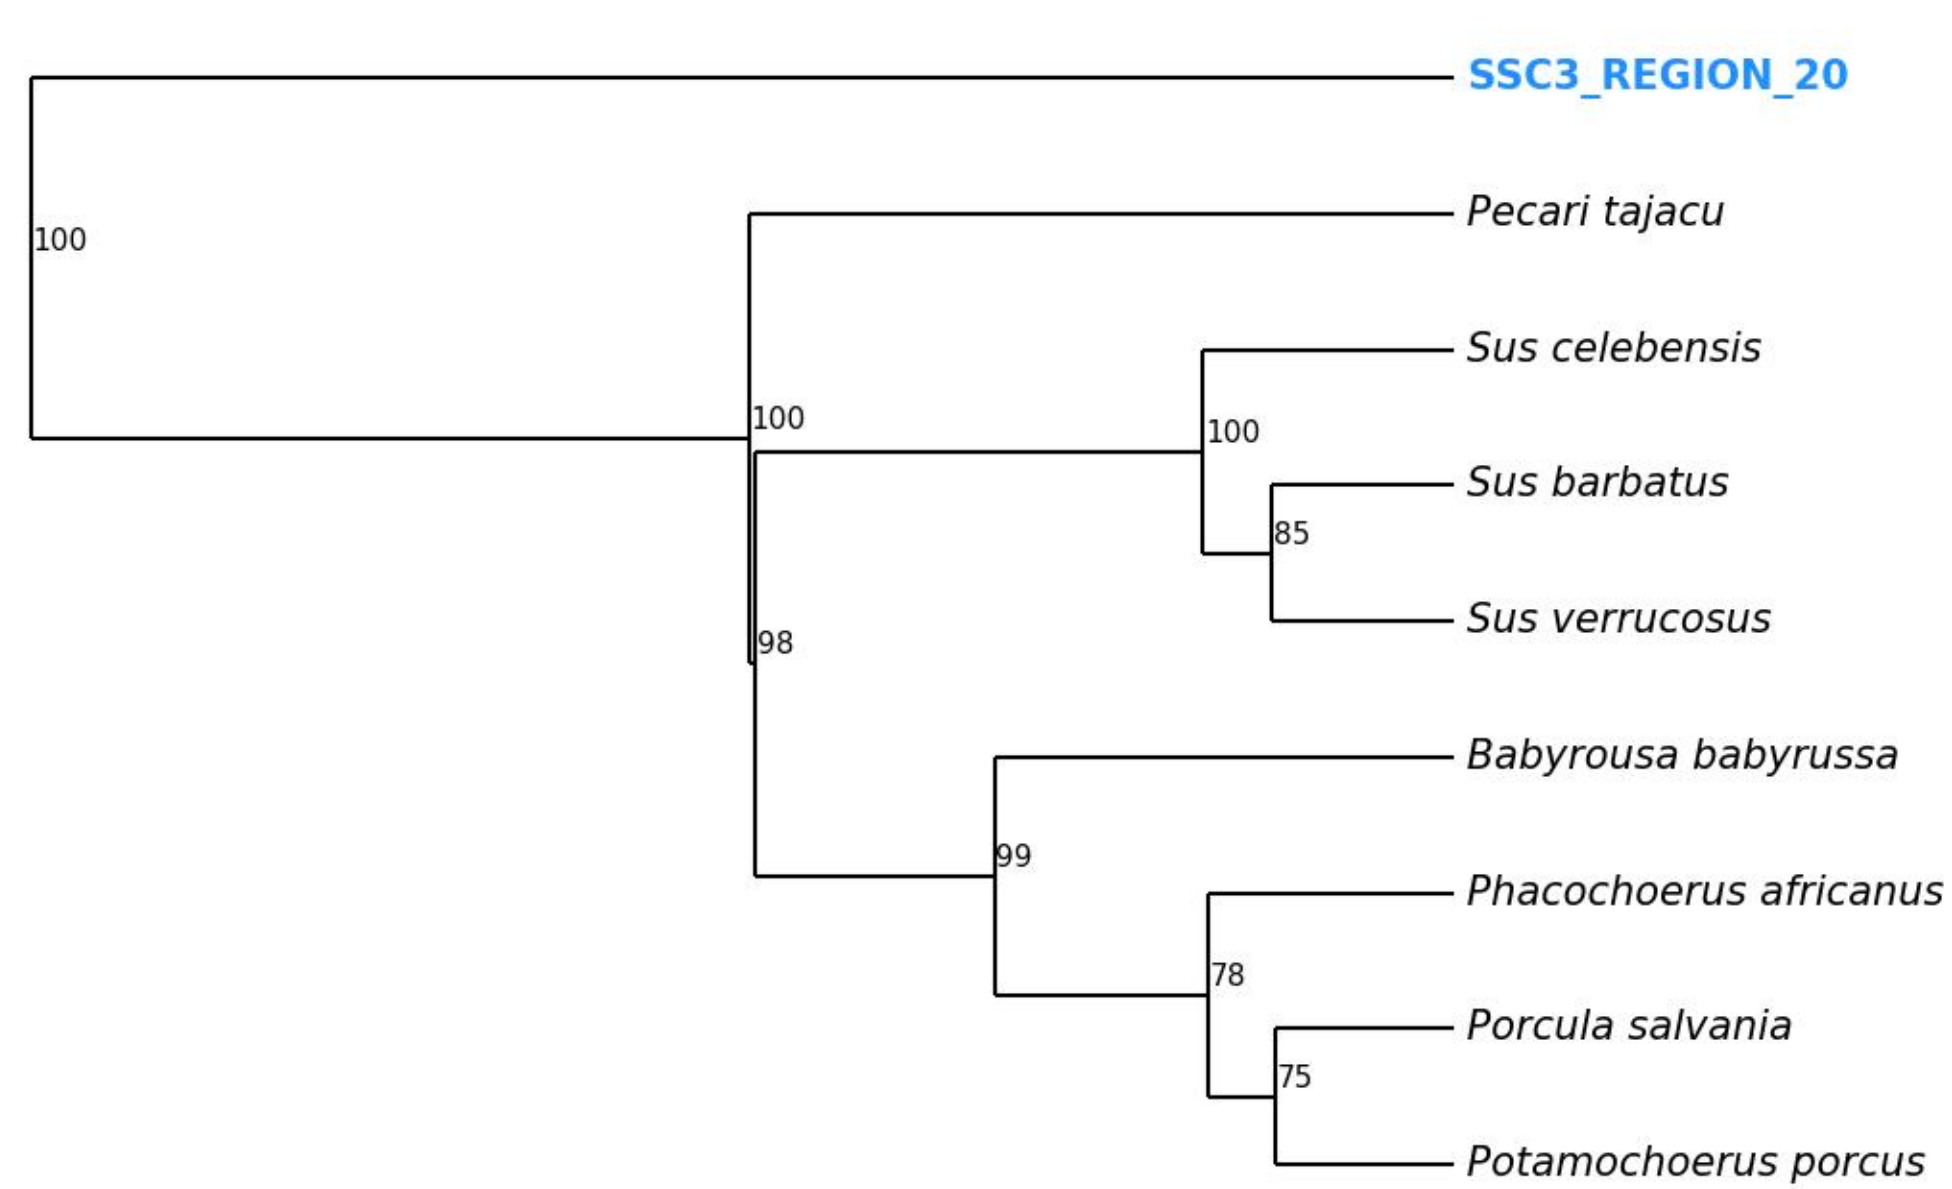

SSC4\_REGION\_3

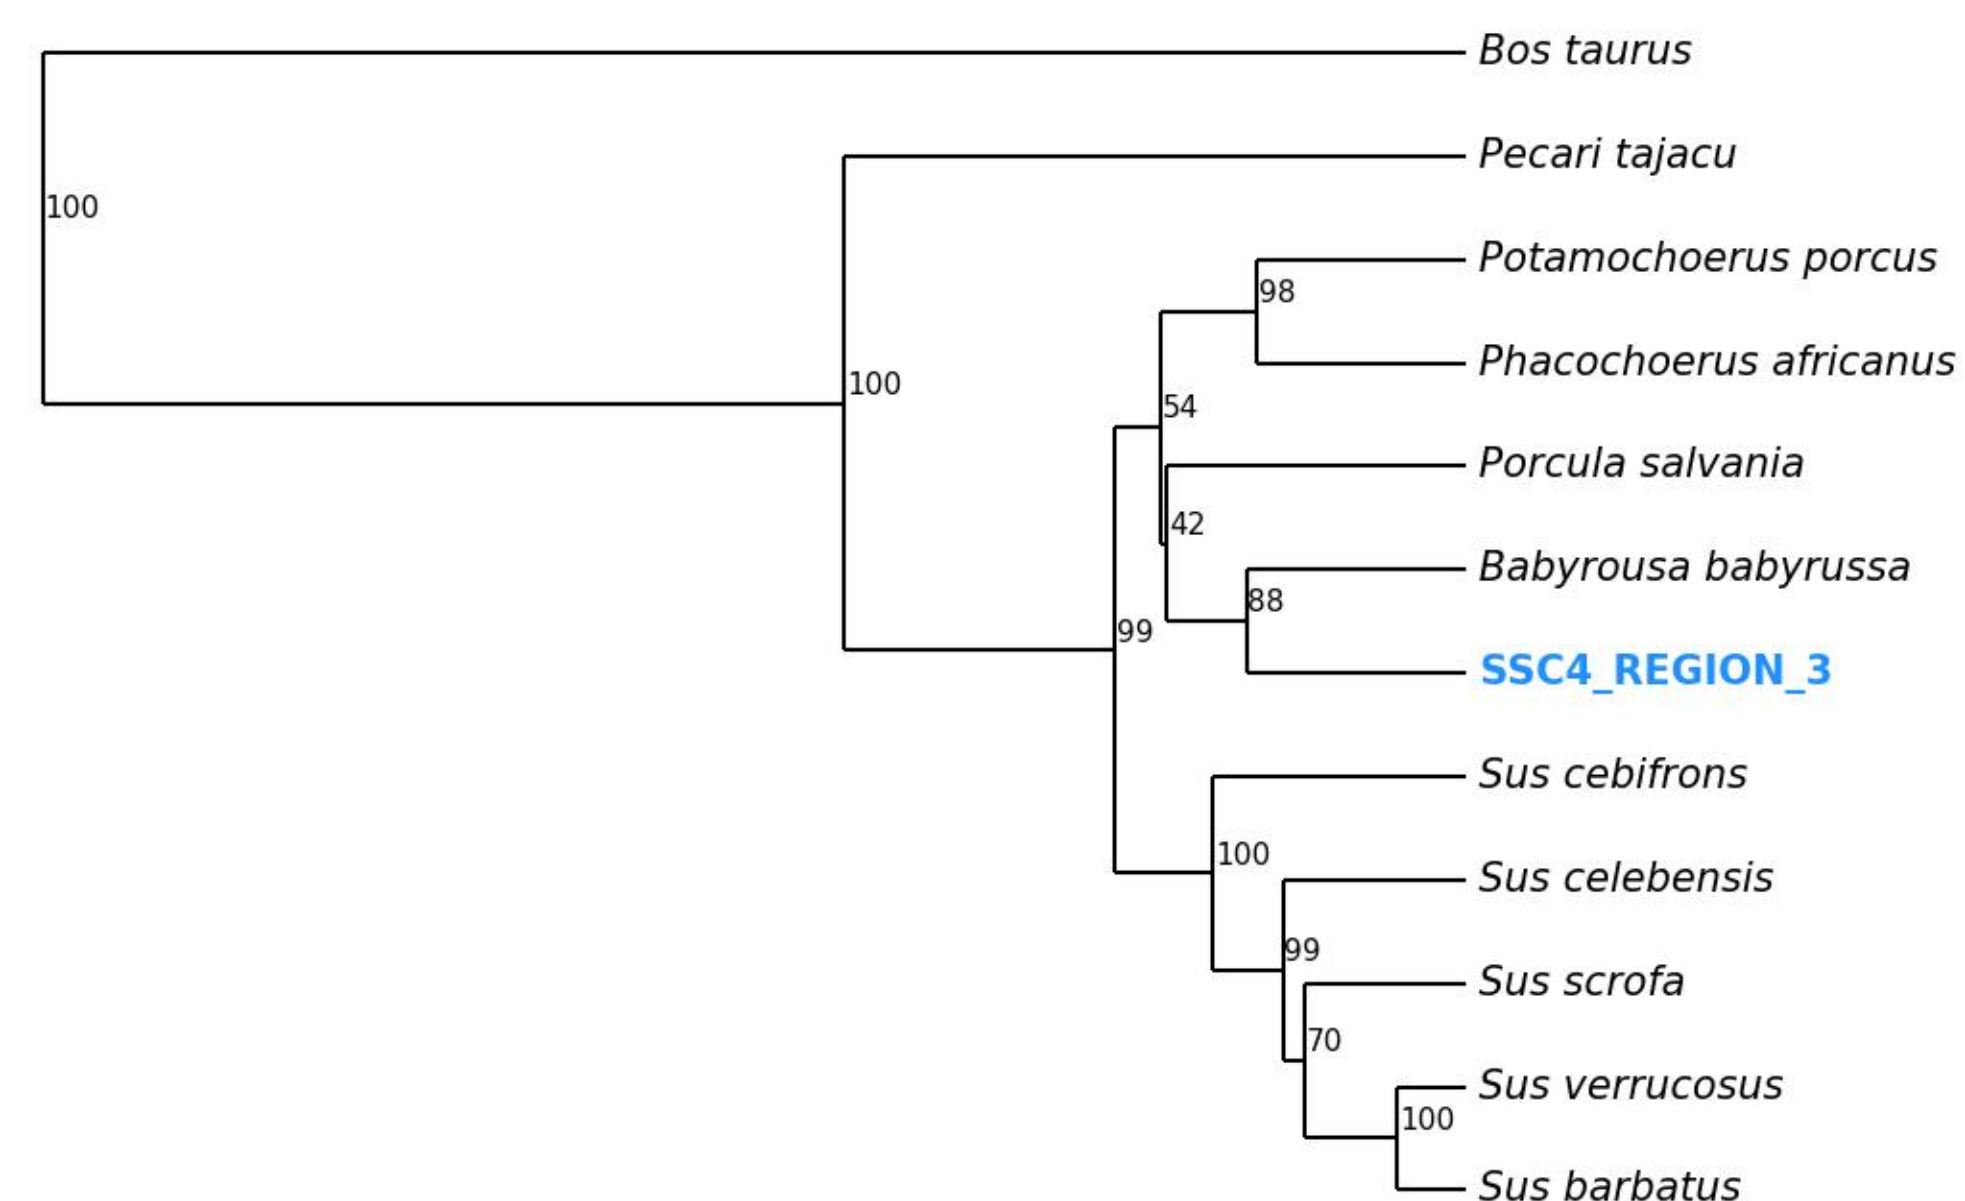

SSC4\_REGION\_6

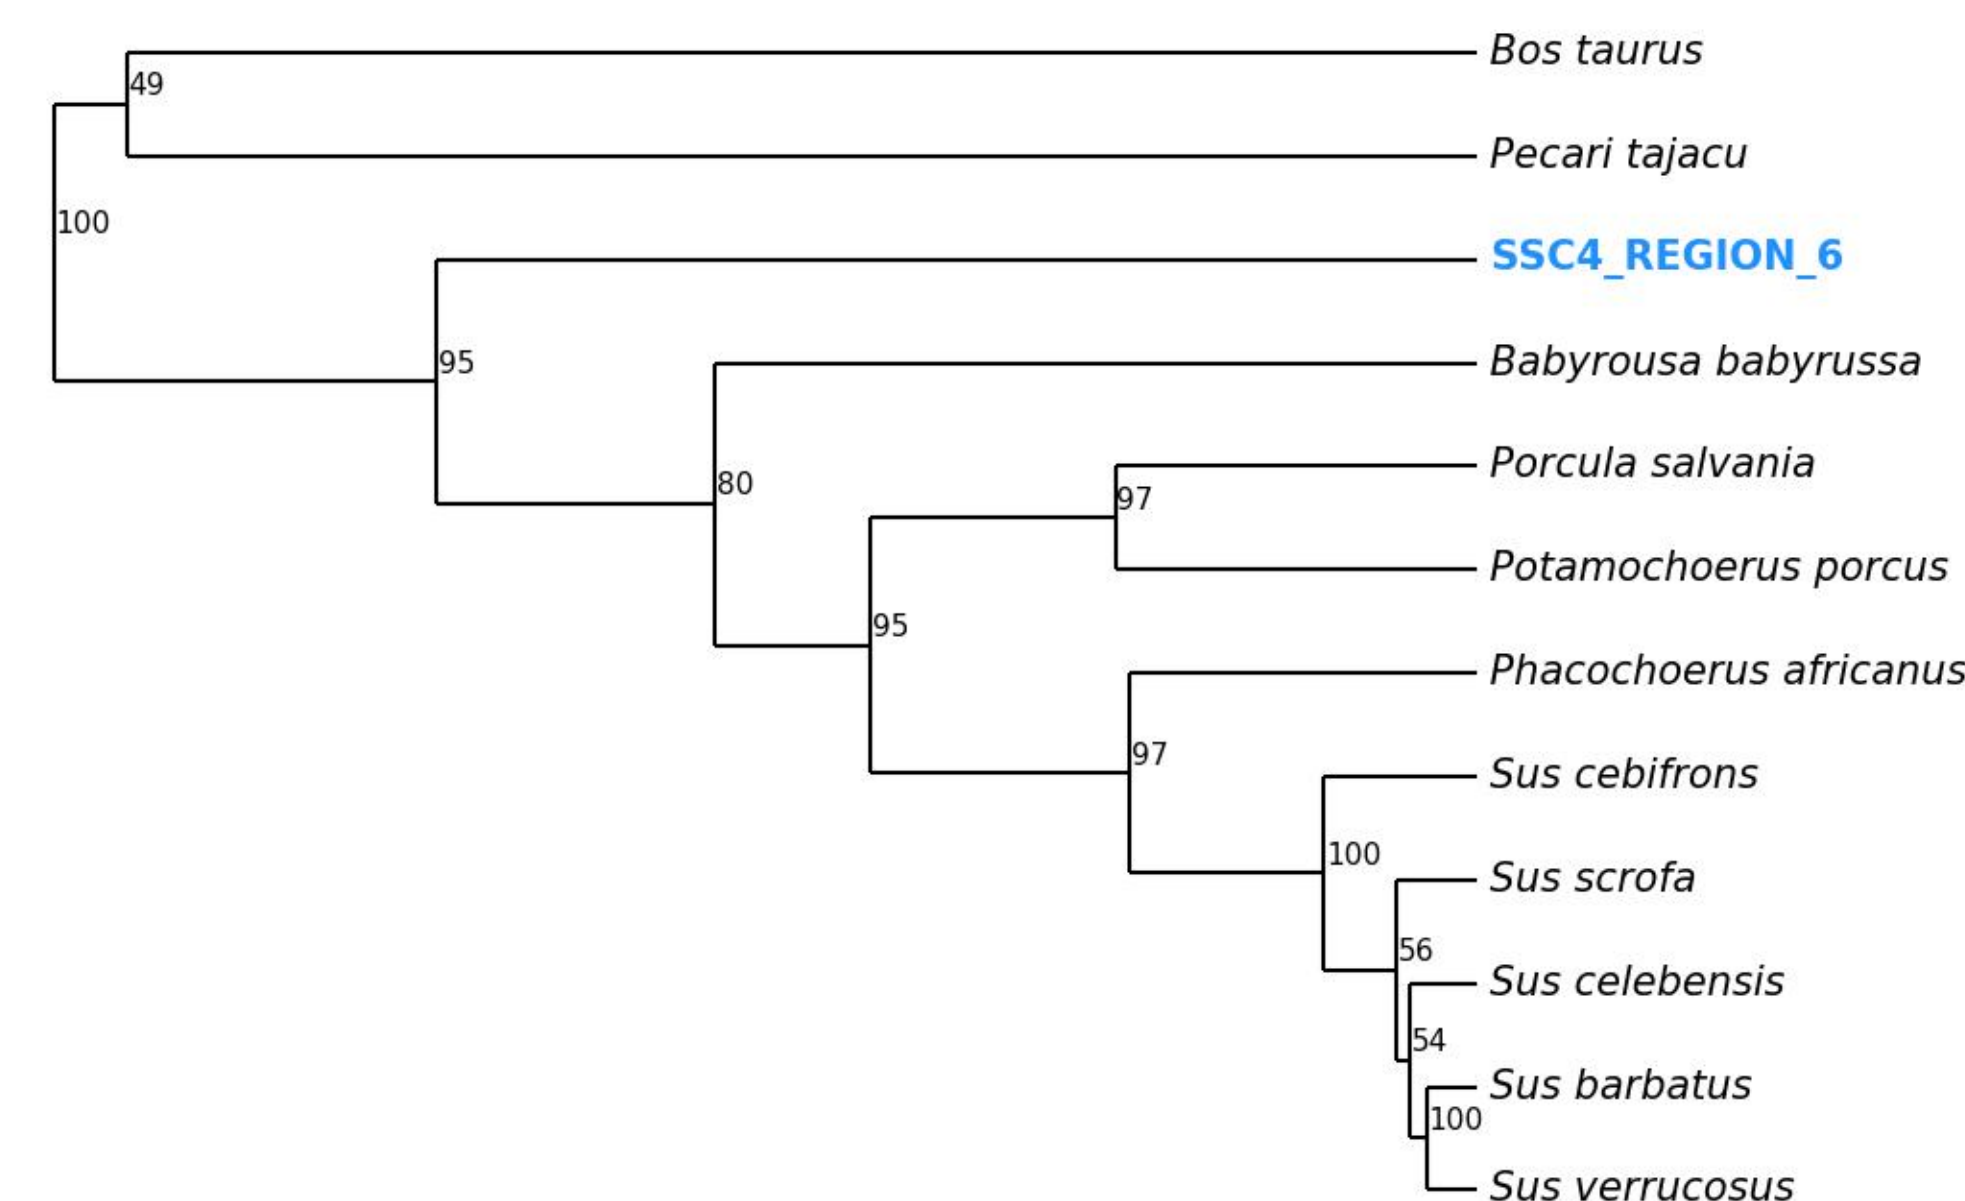

SSC4\_REGION\_7

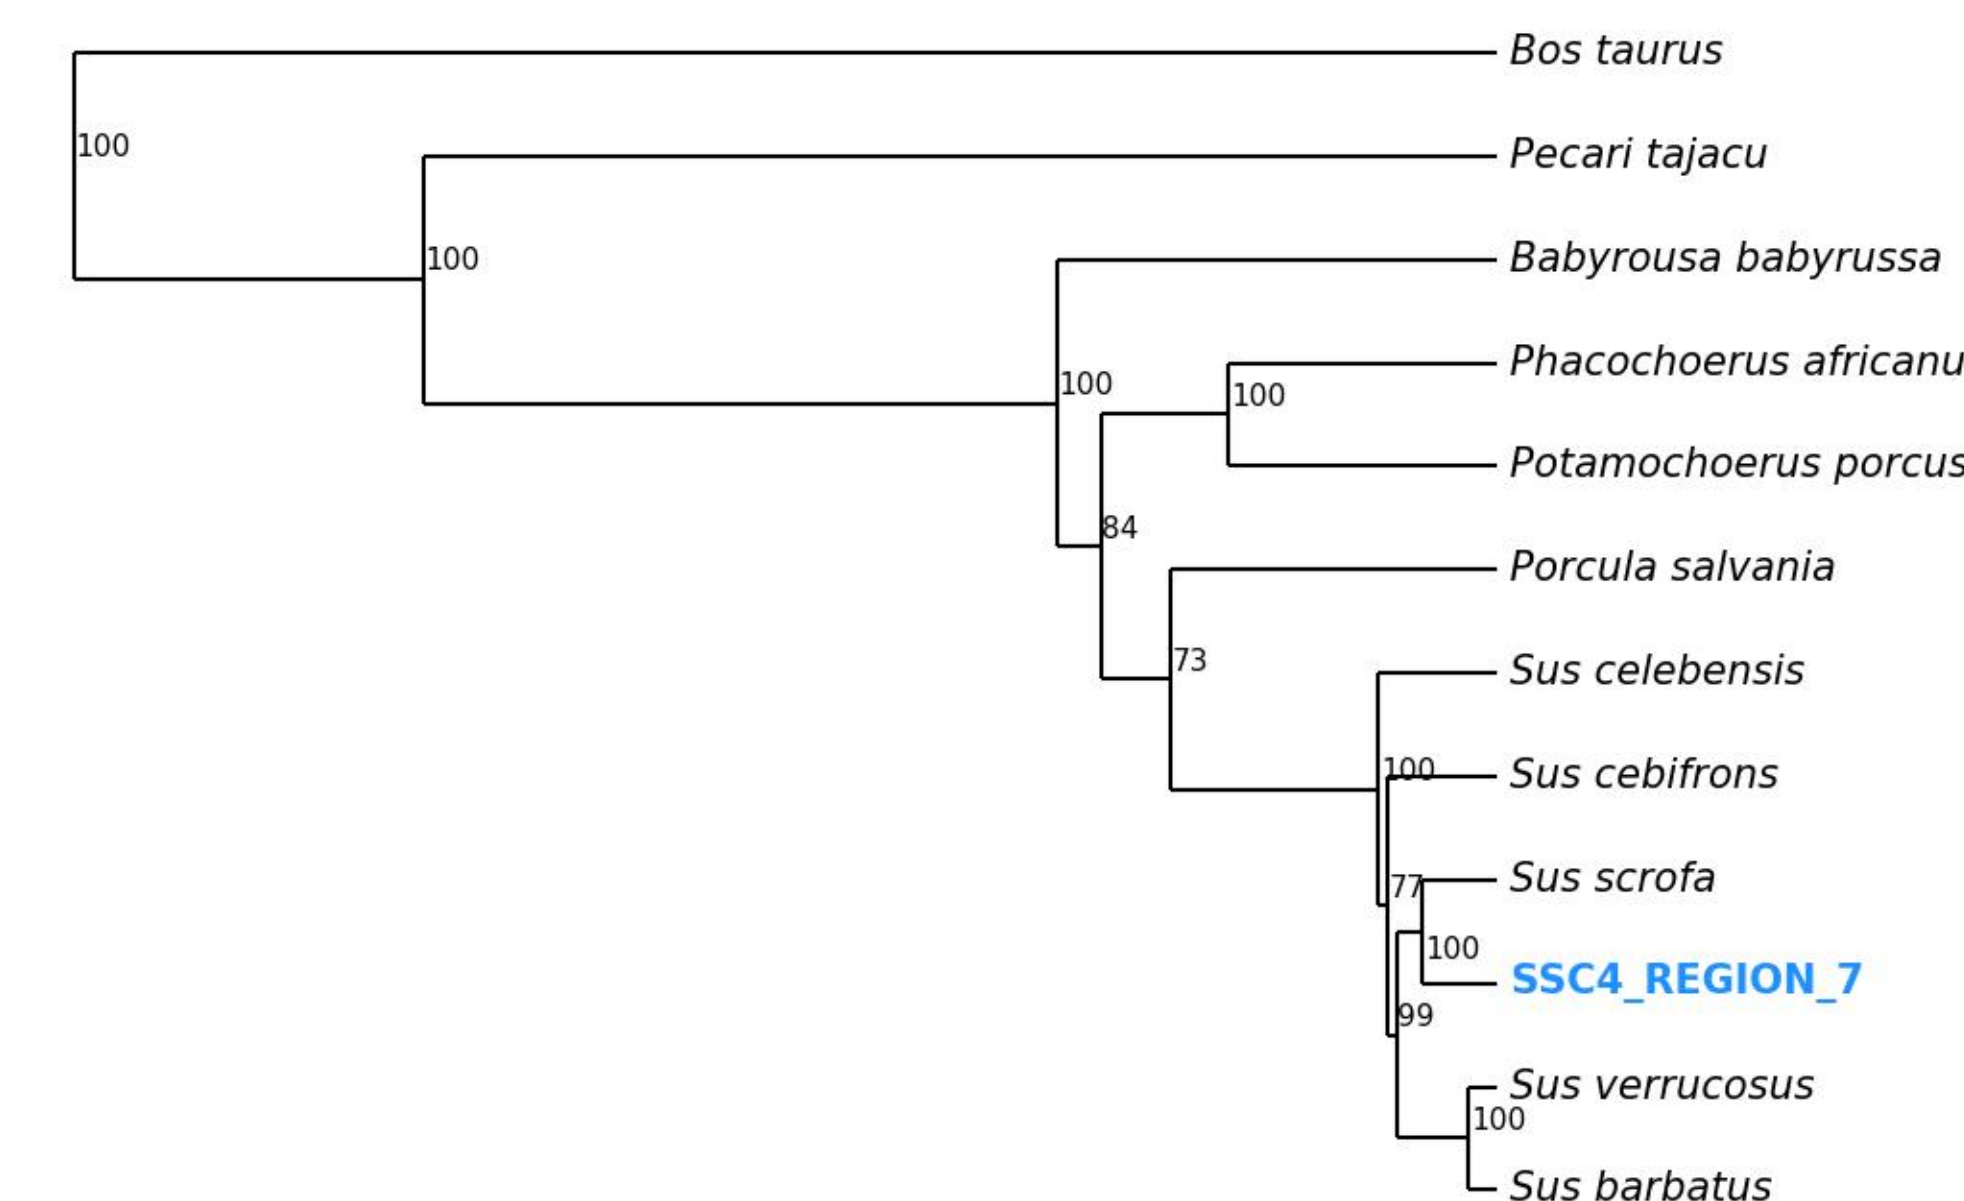

SSC4\_REGION\_8

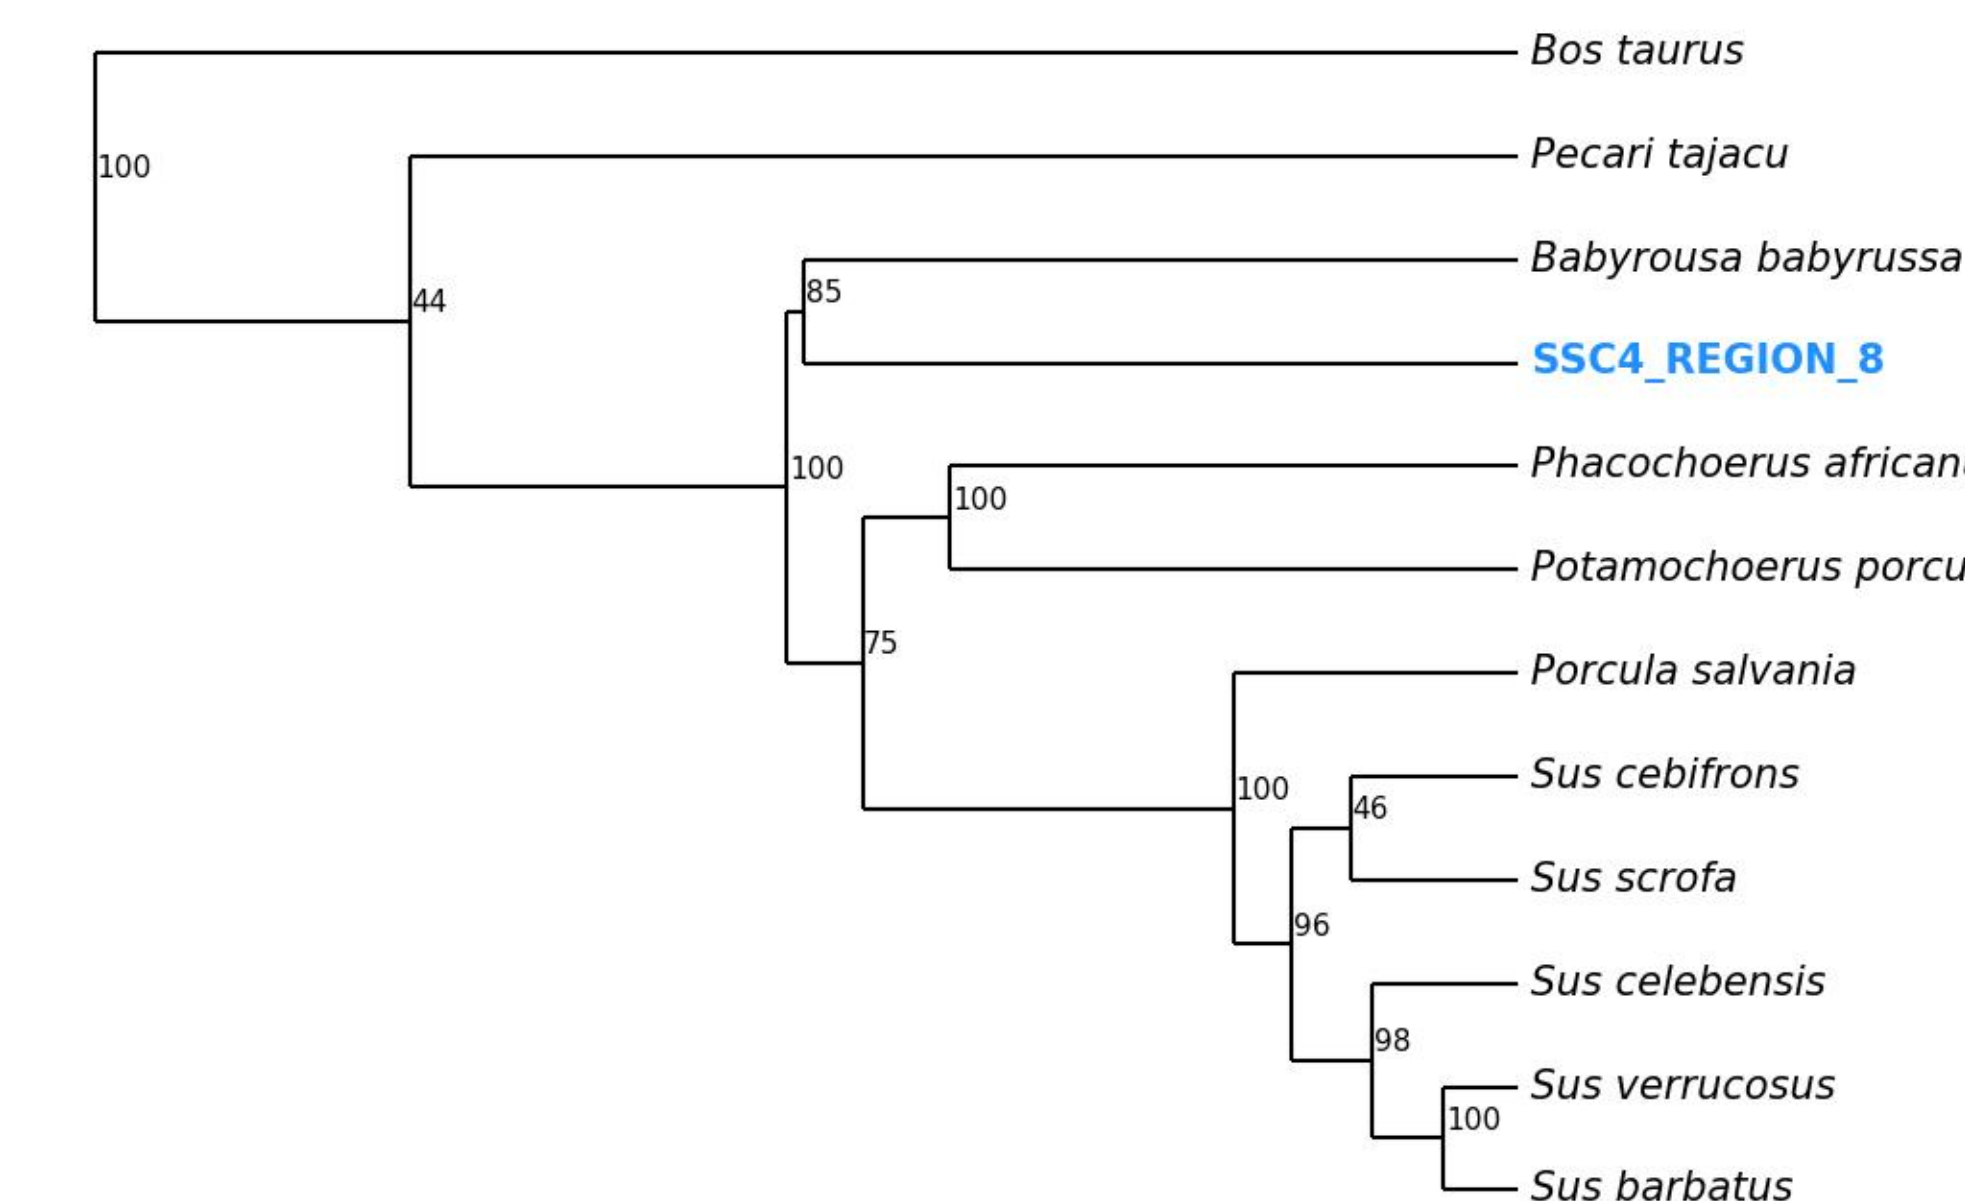

SSC4\_REGION\_9

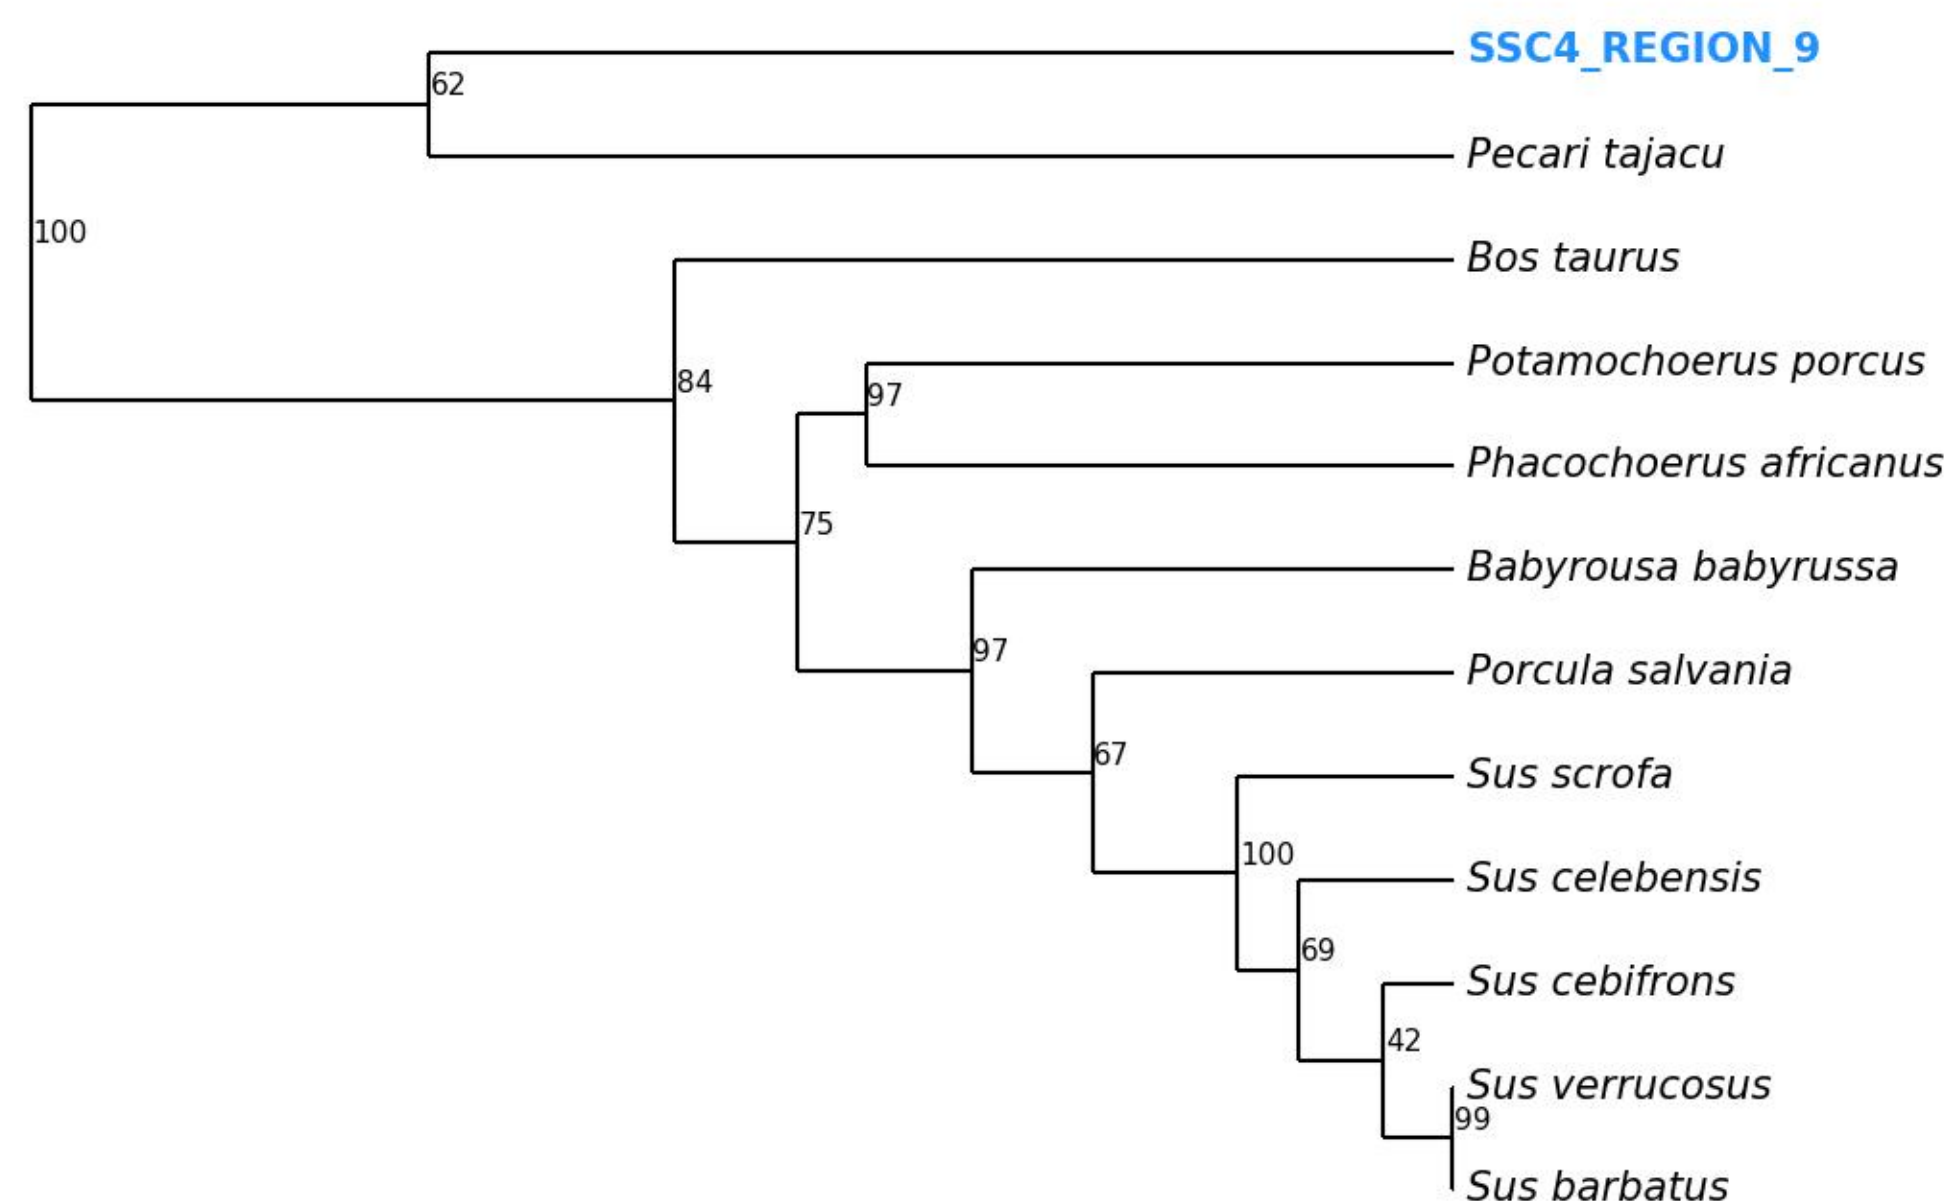

SSC4\_REGION\_13

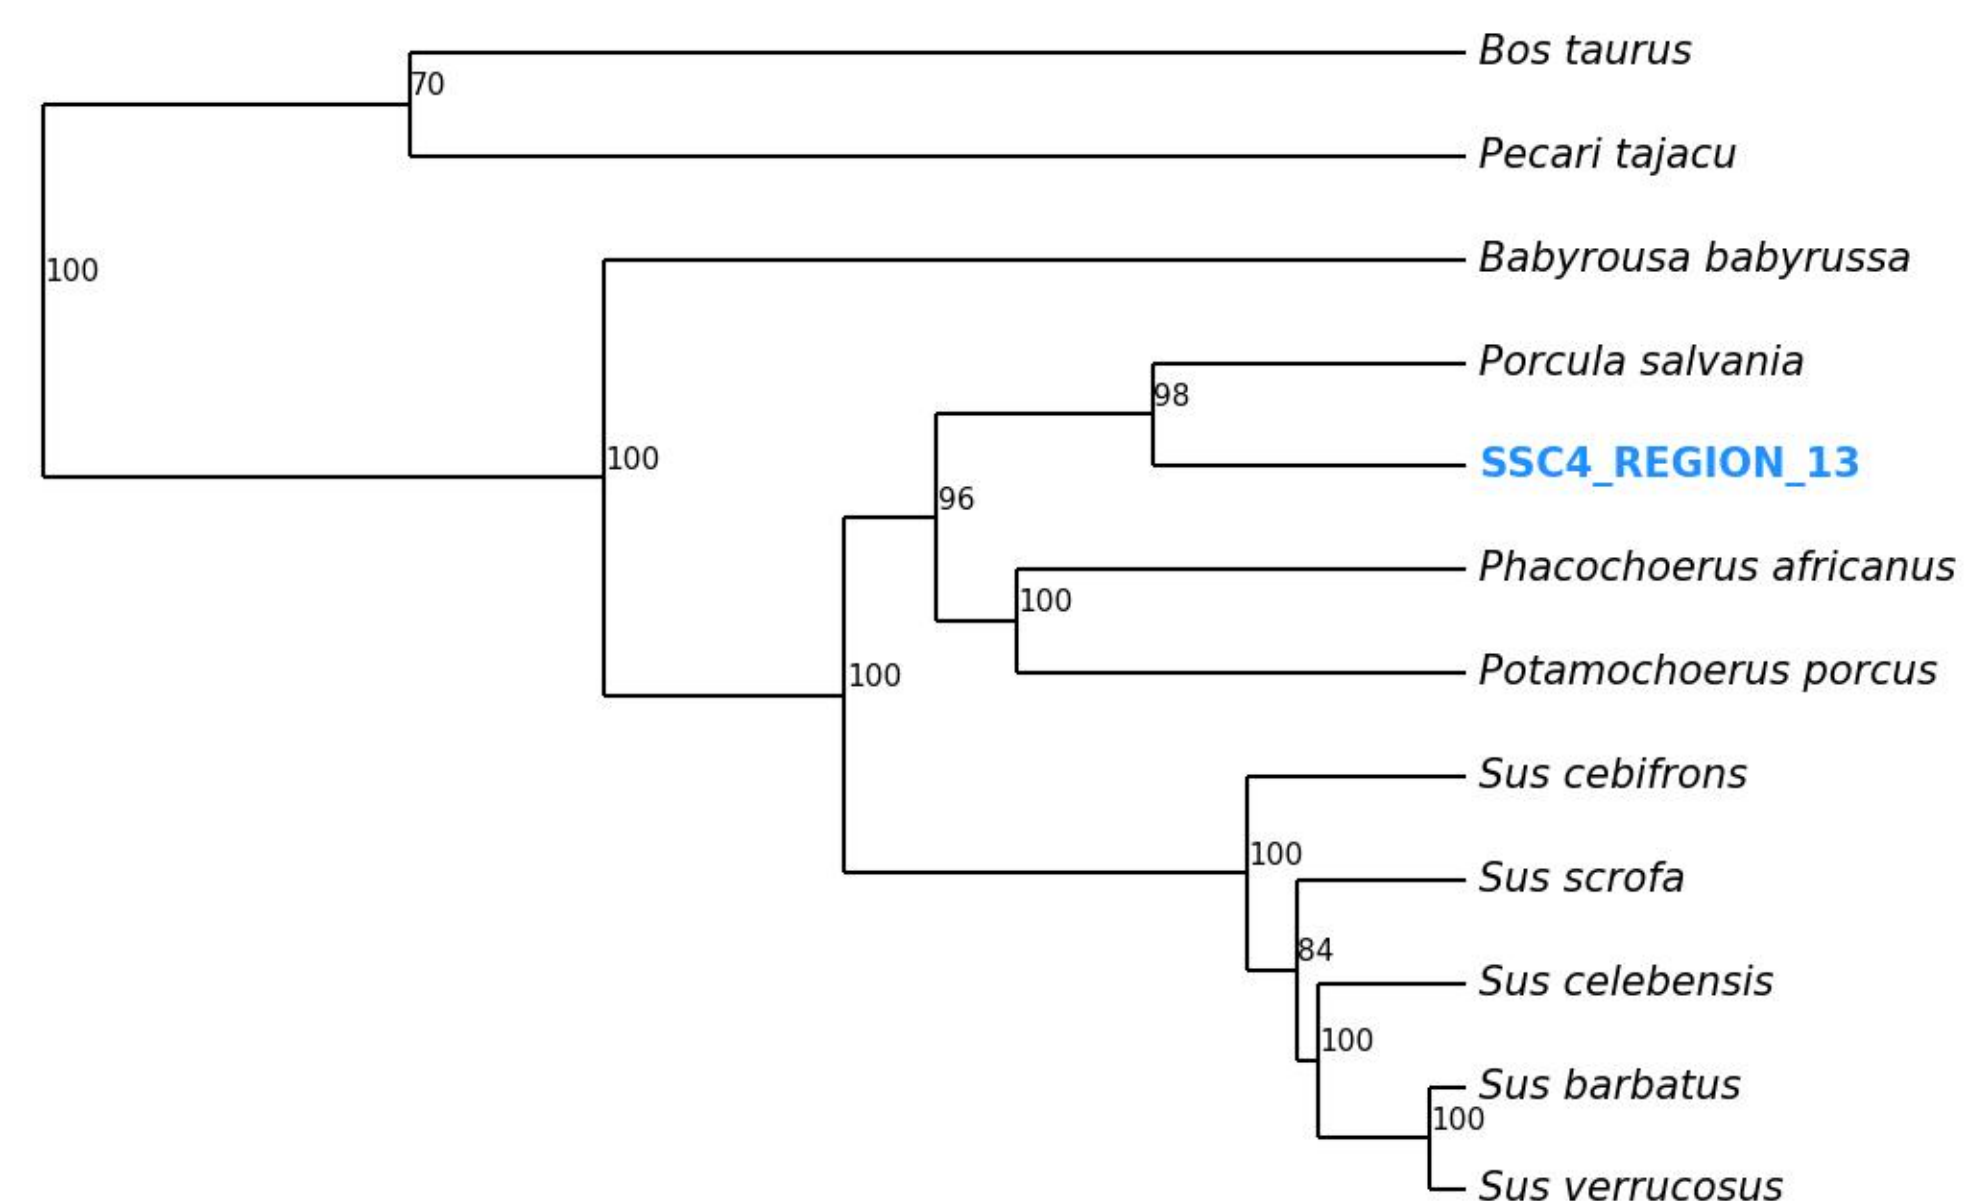

SSC4\_REGION\_15

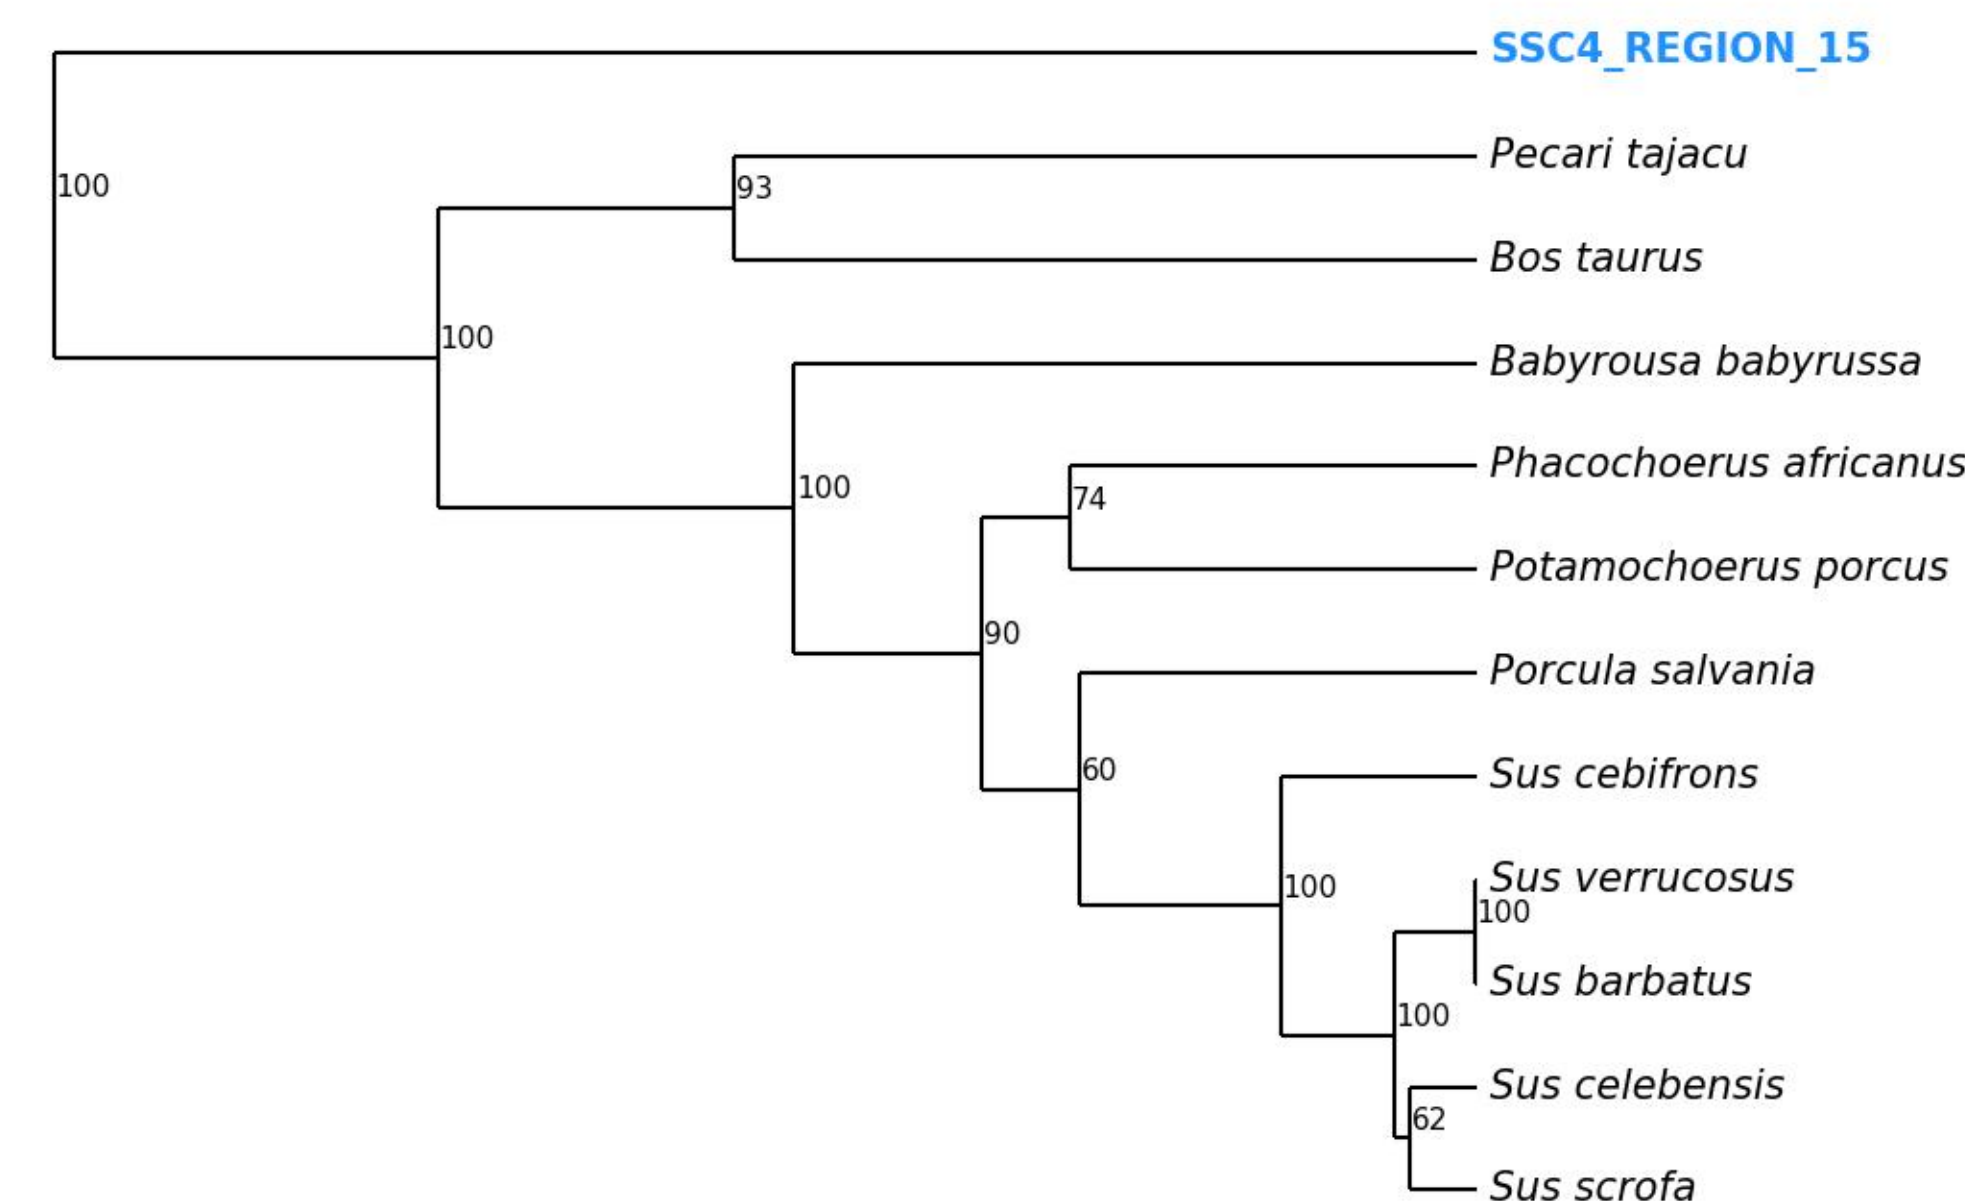

SSC4\_REGION\_17

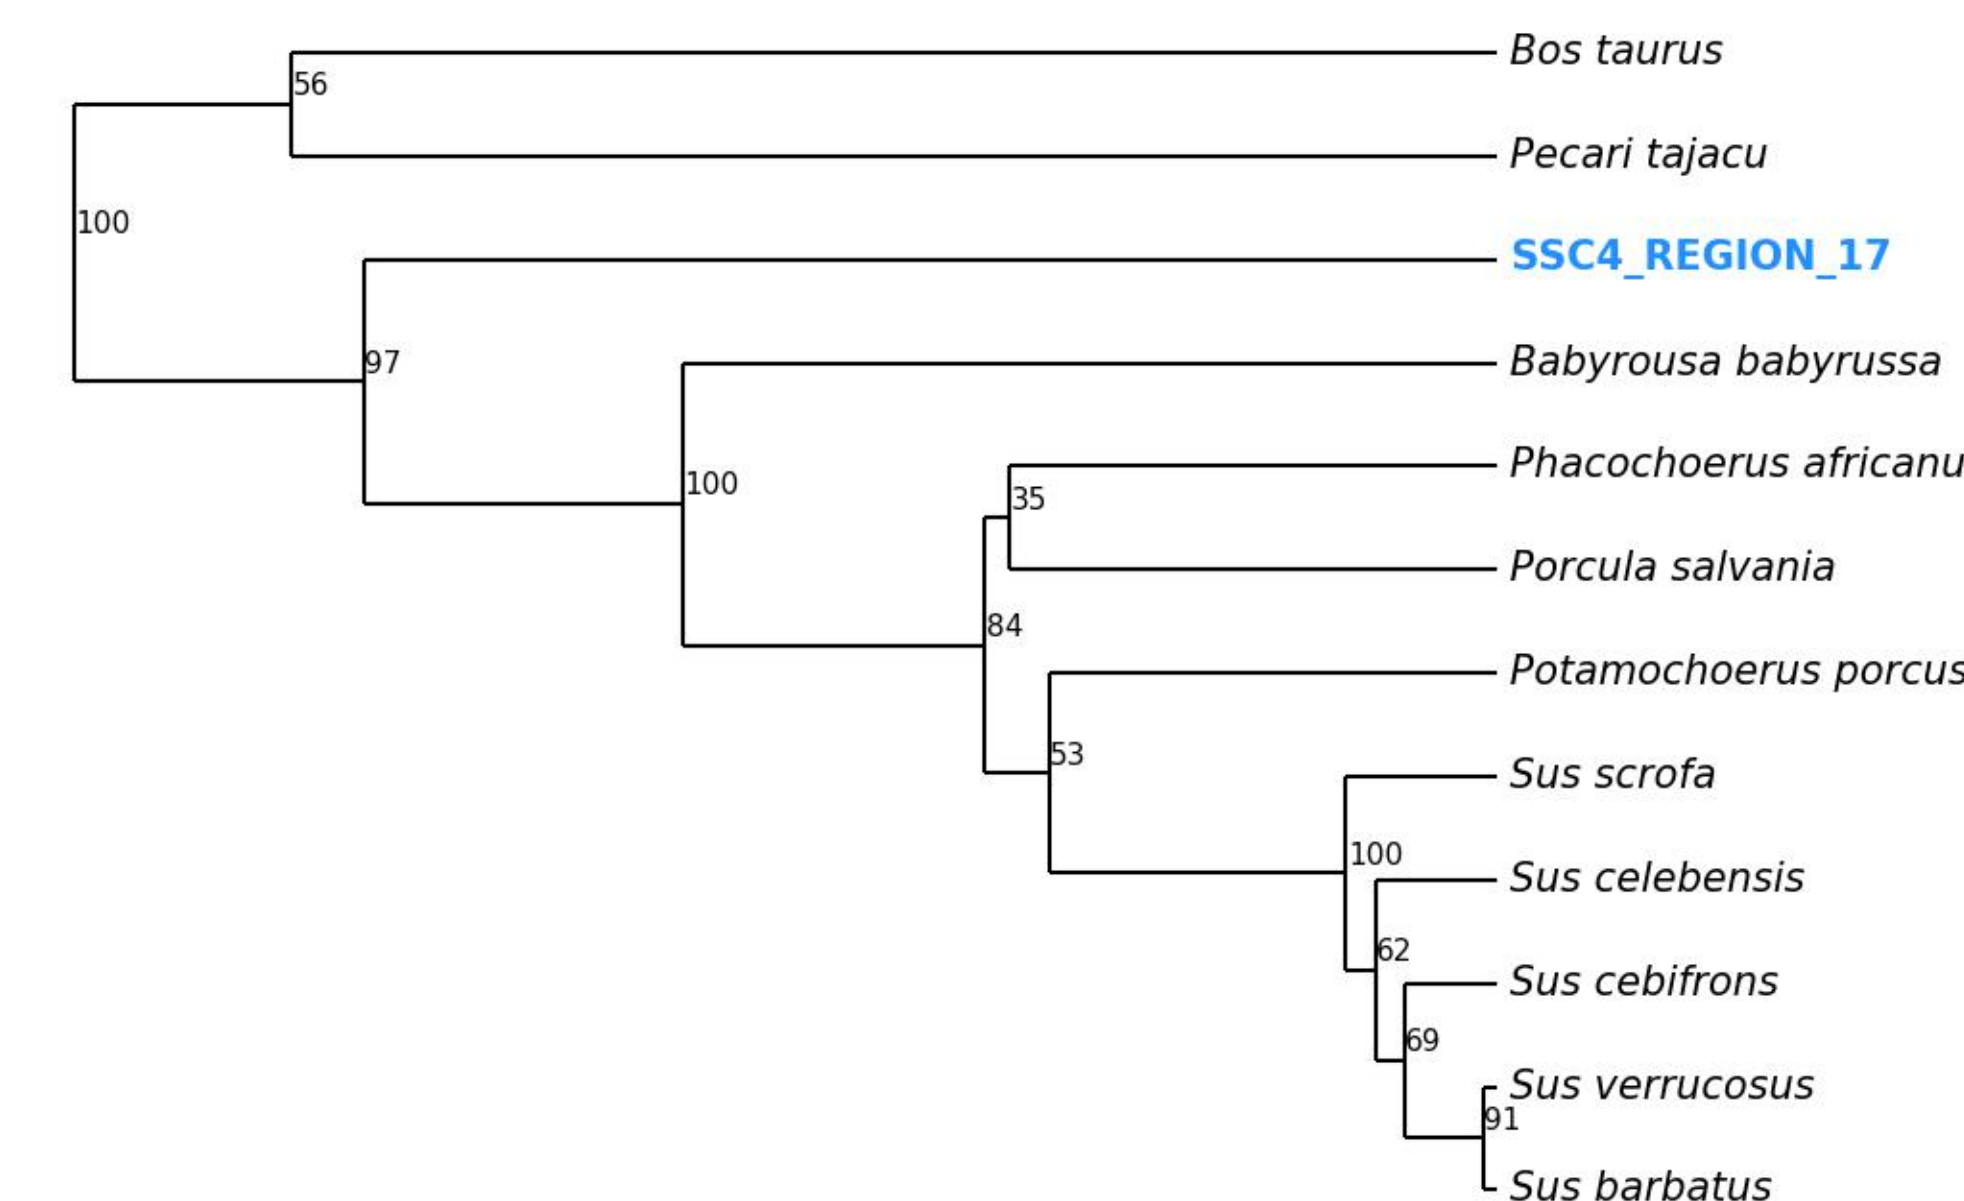

SSC4\_REGION\_18

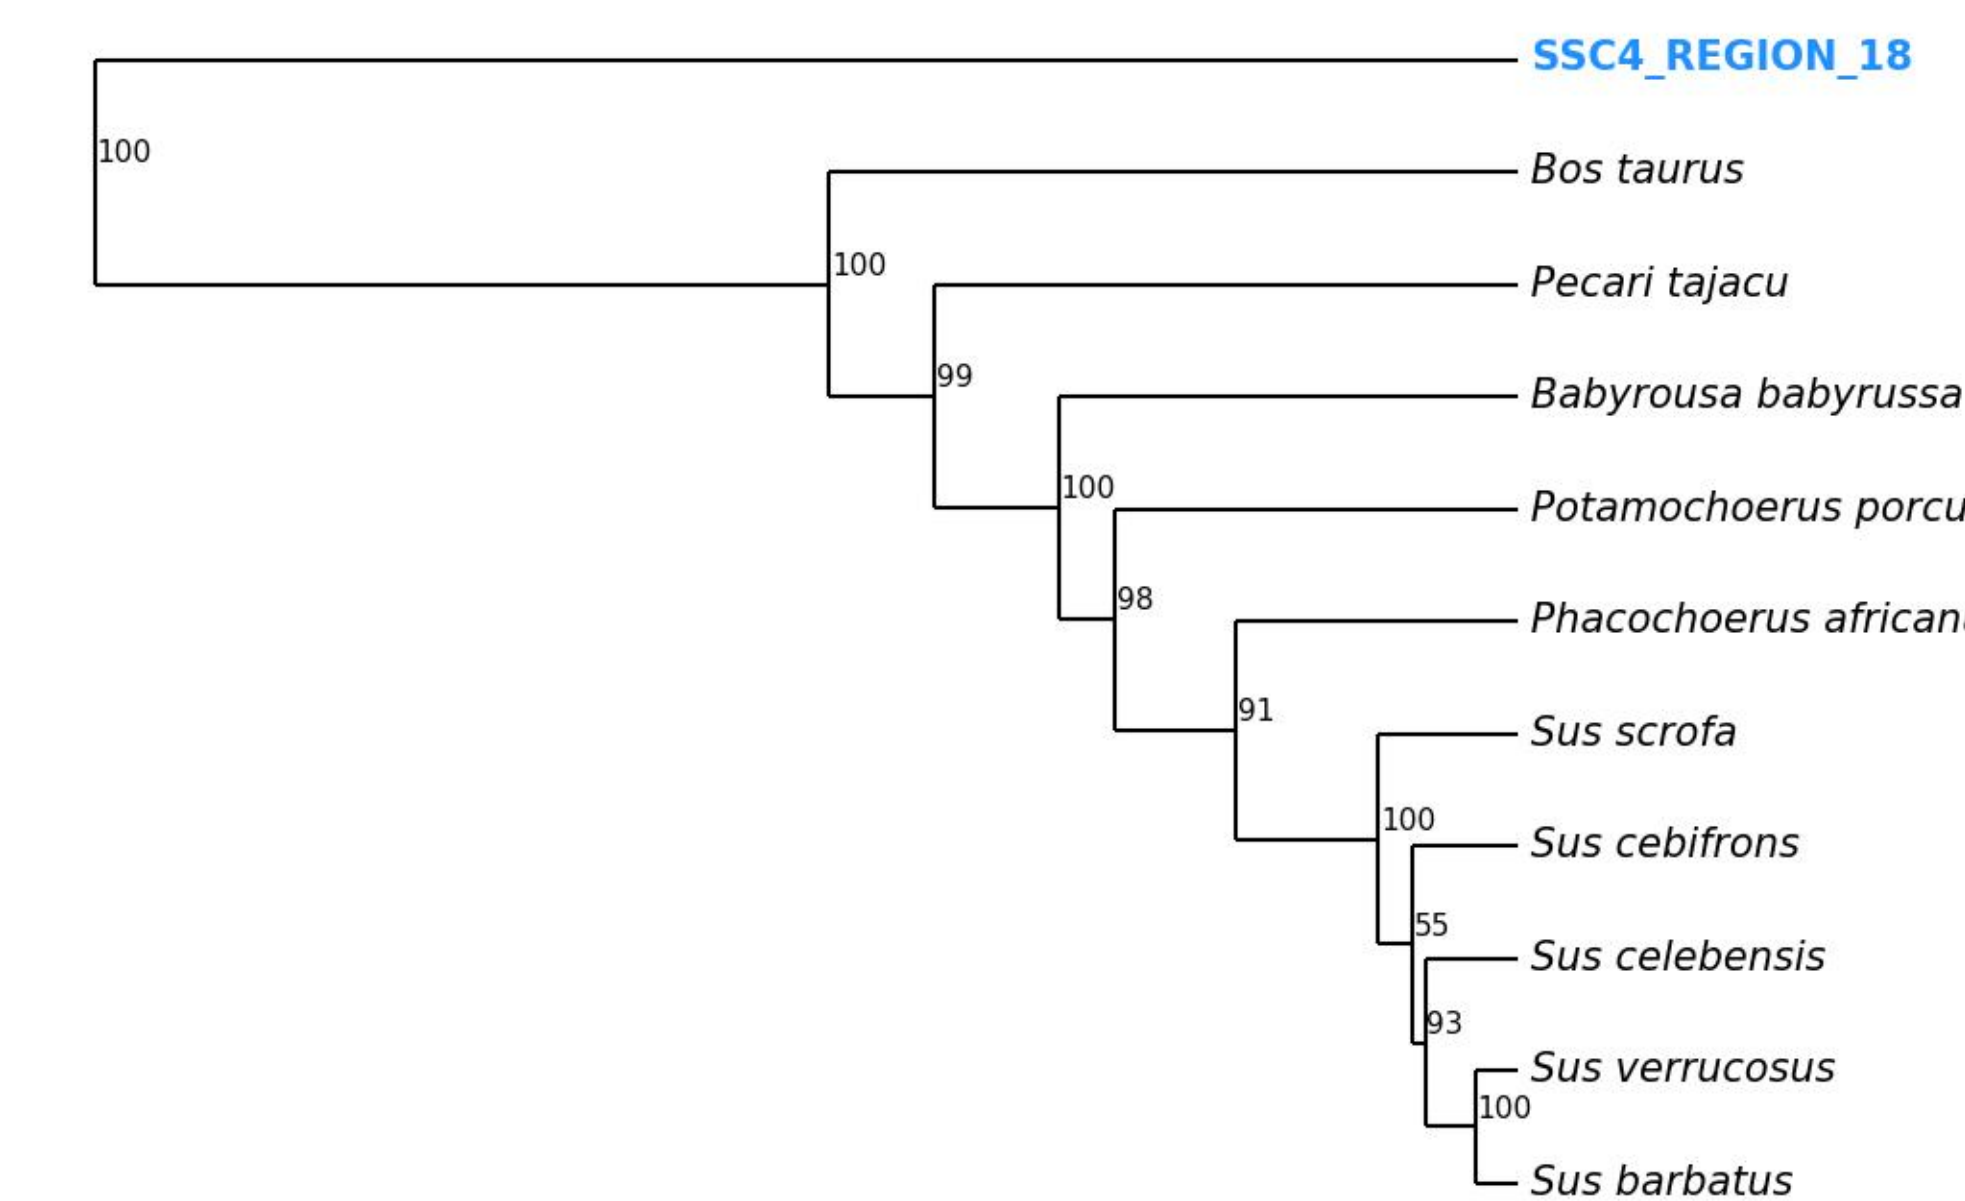

SSC4\_REGION\_20

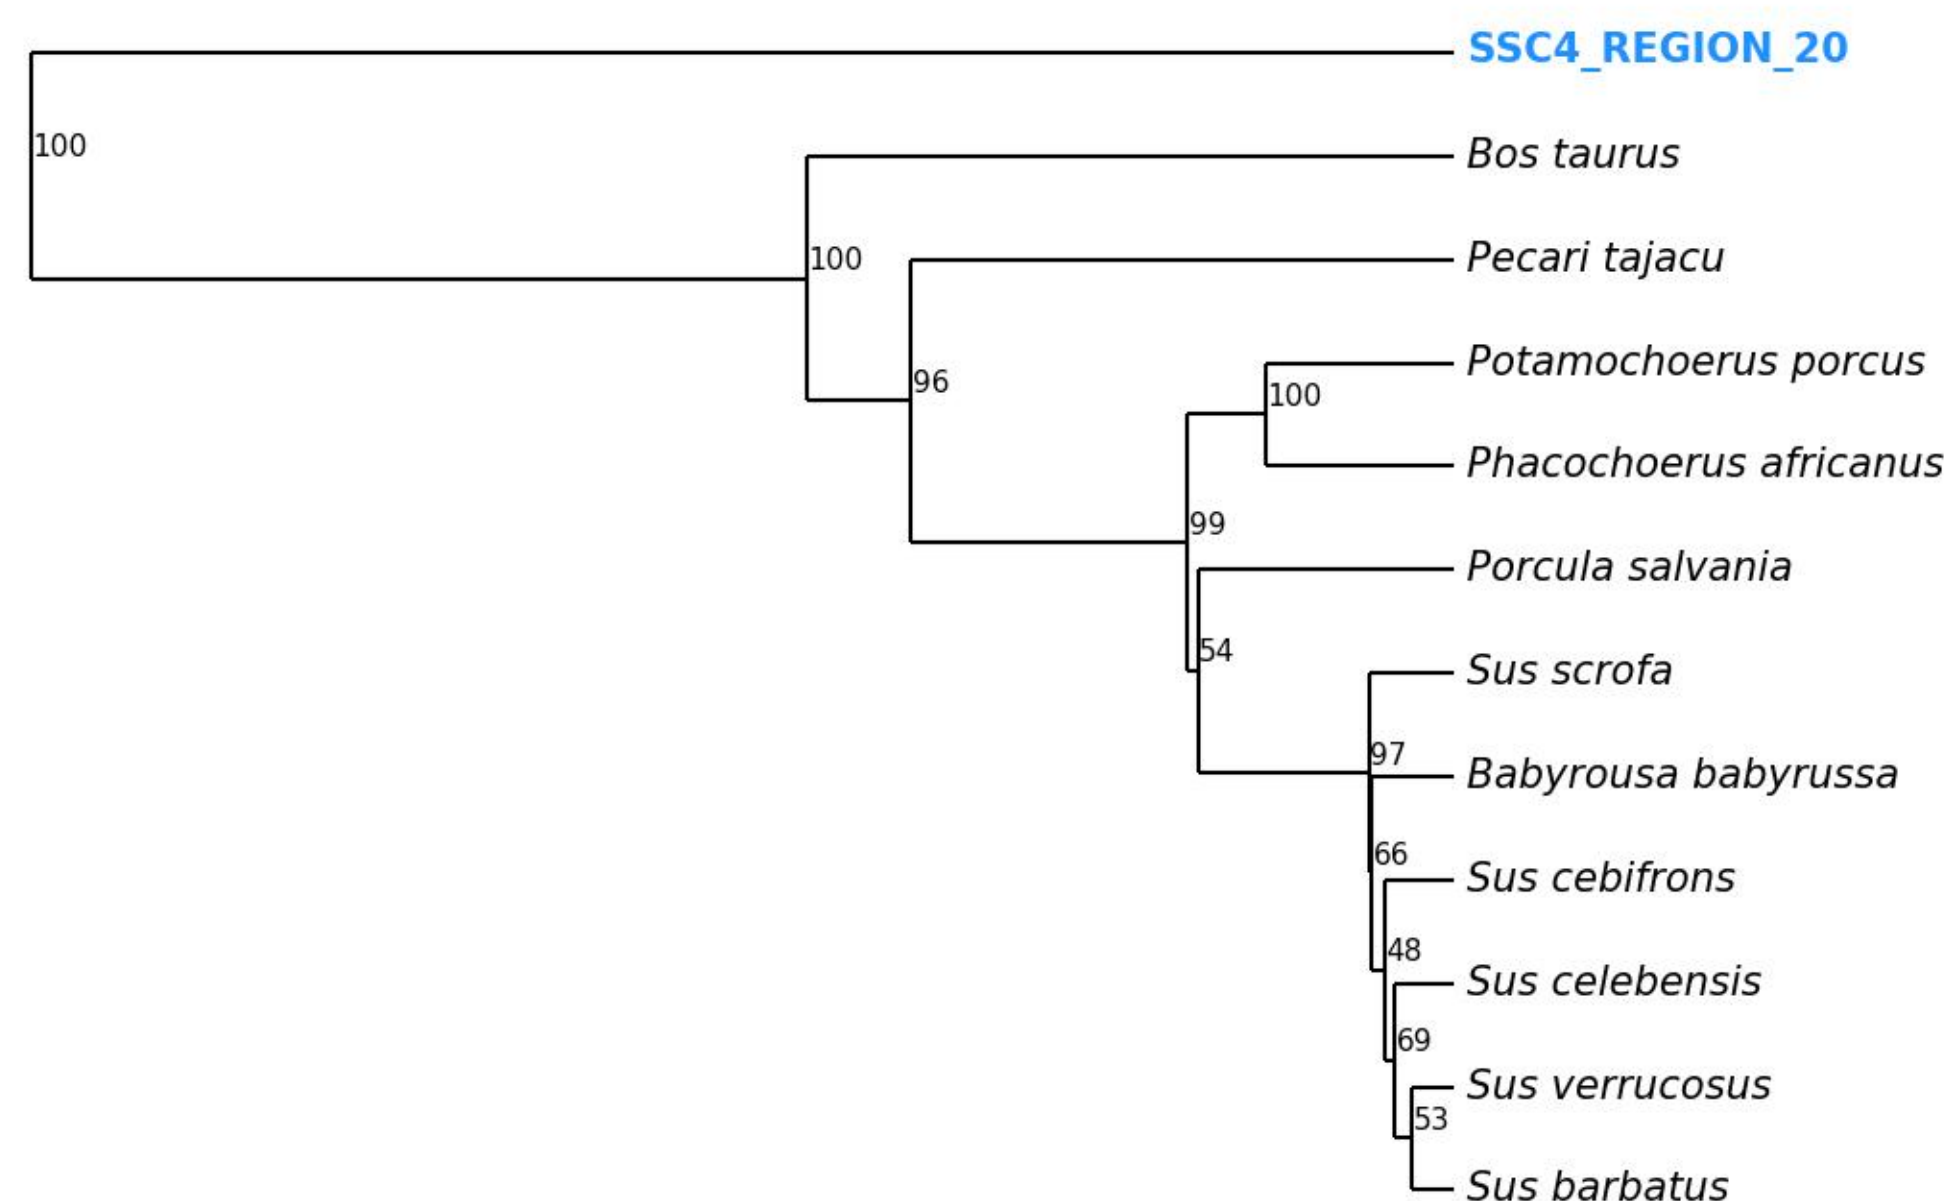

SSC4\_REGION\_21

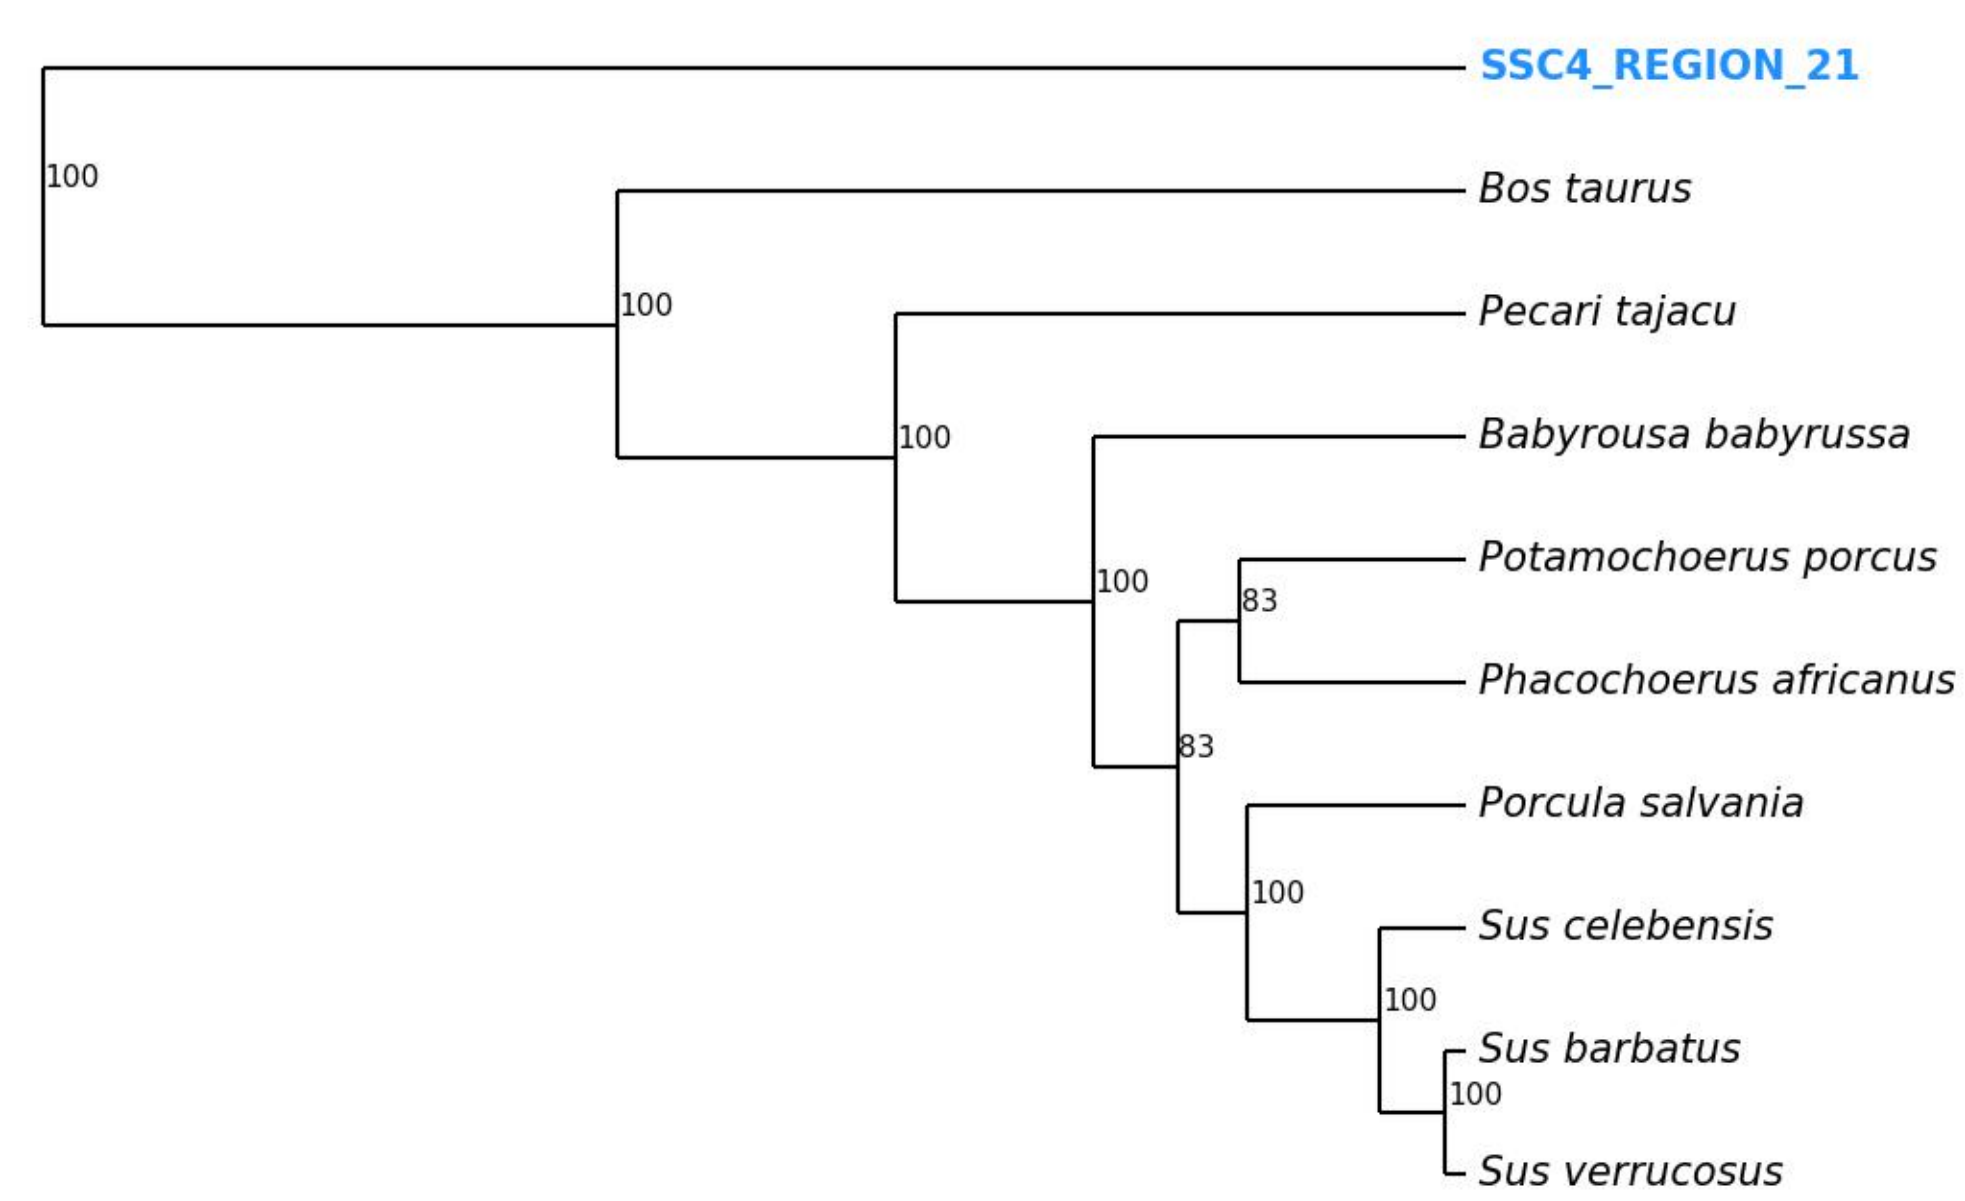

SSC5\_REGION\_8

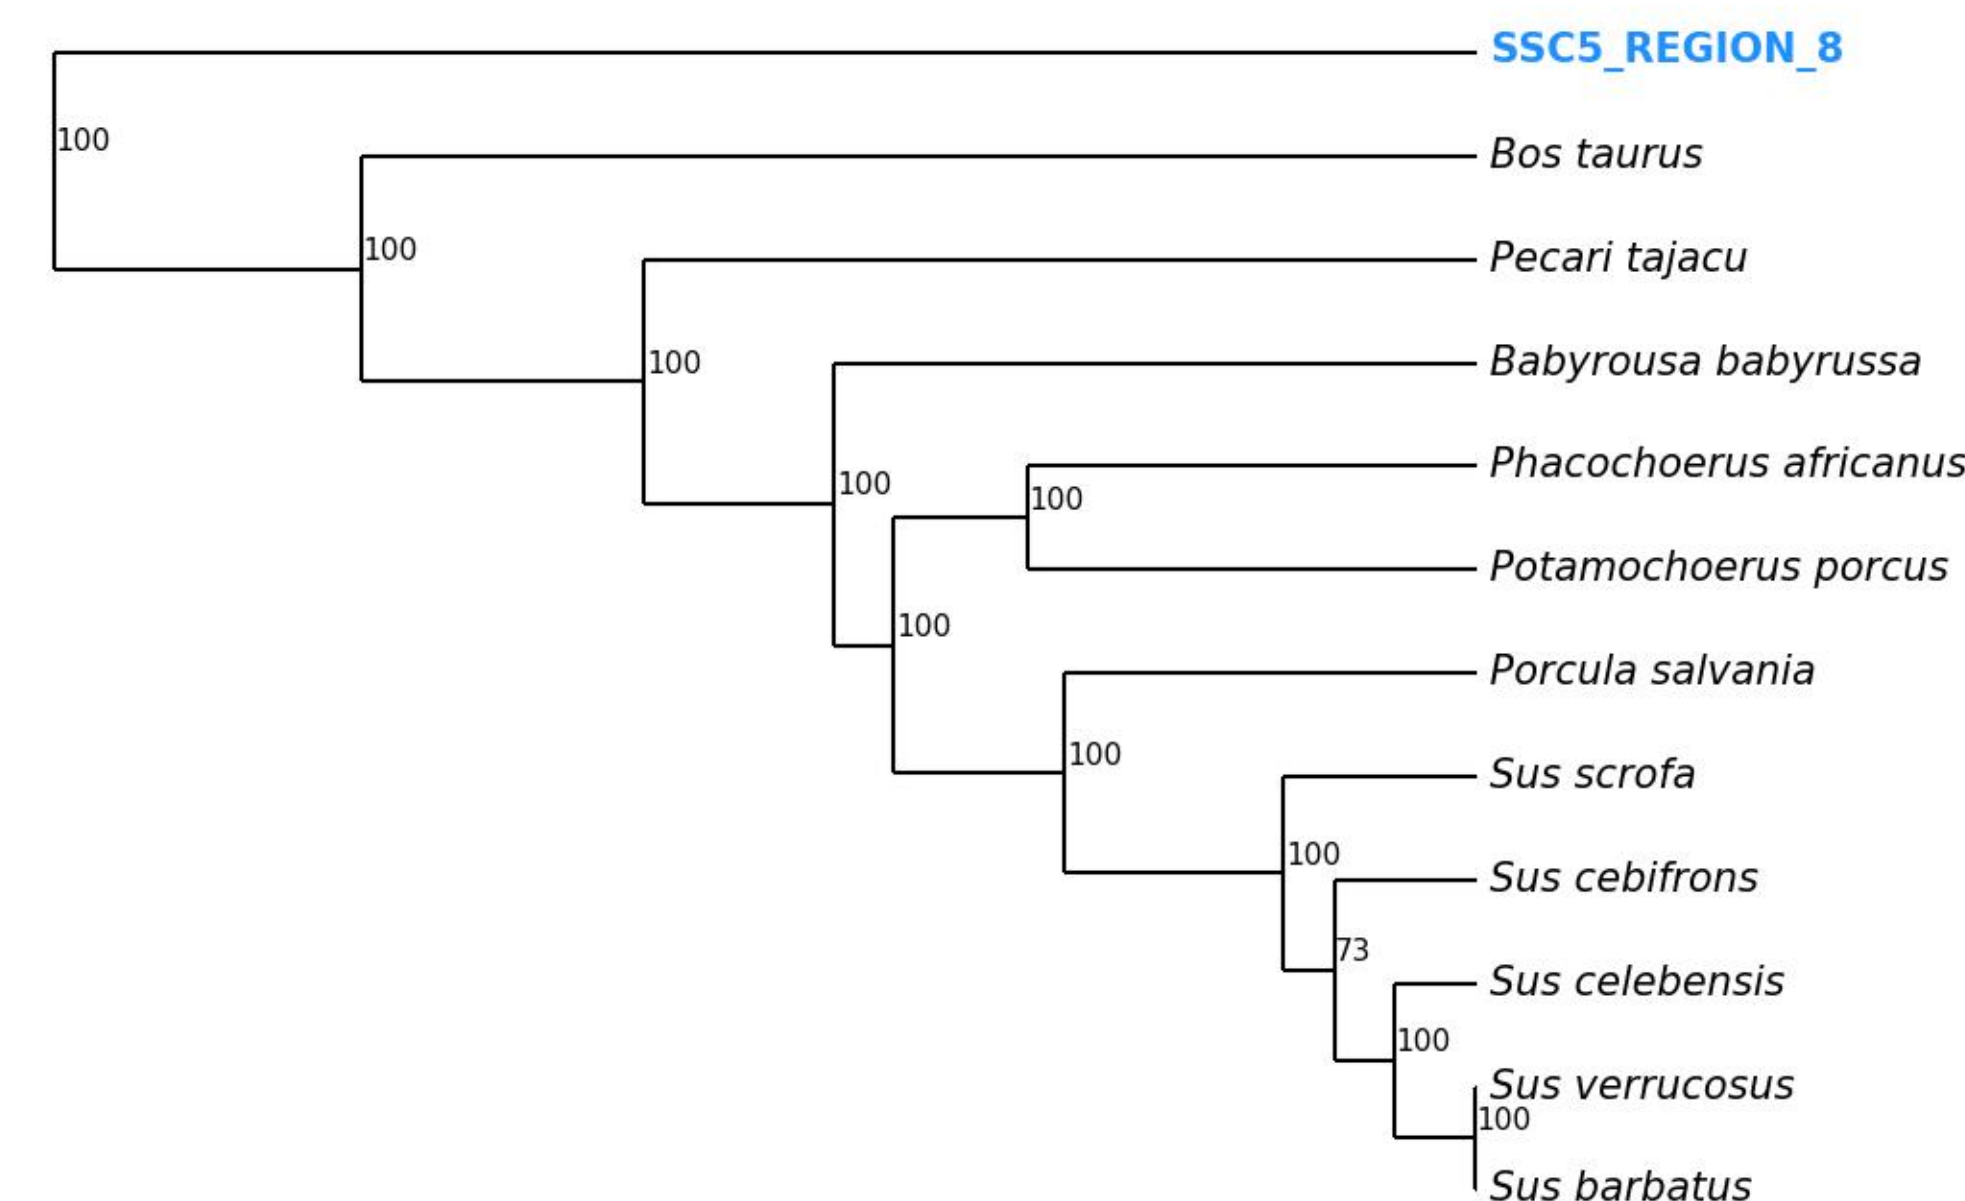

SSC5\_REGION\_9

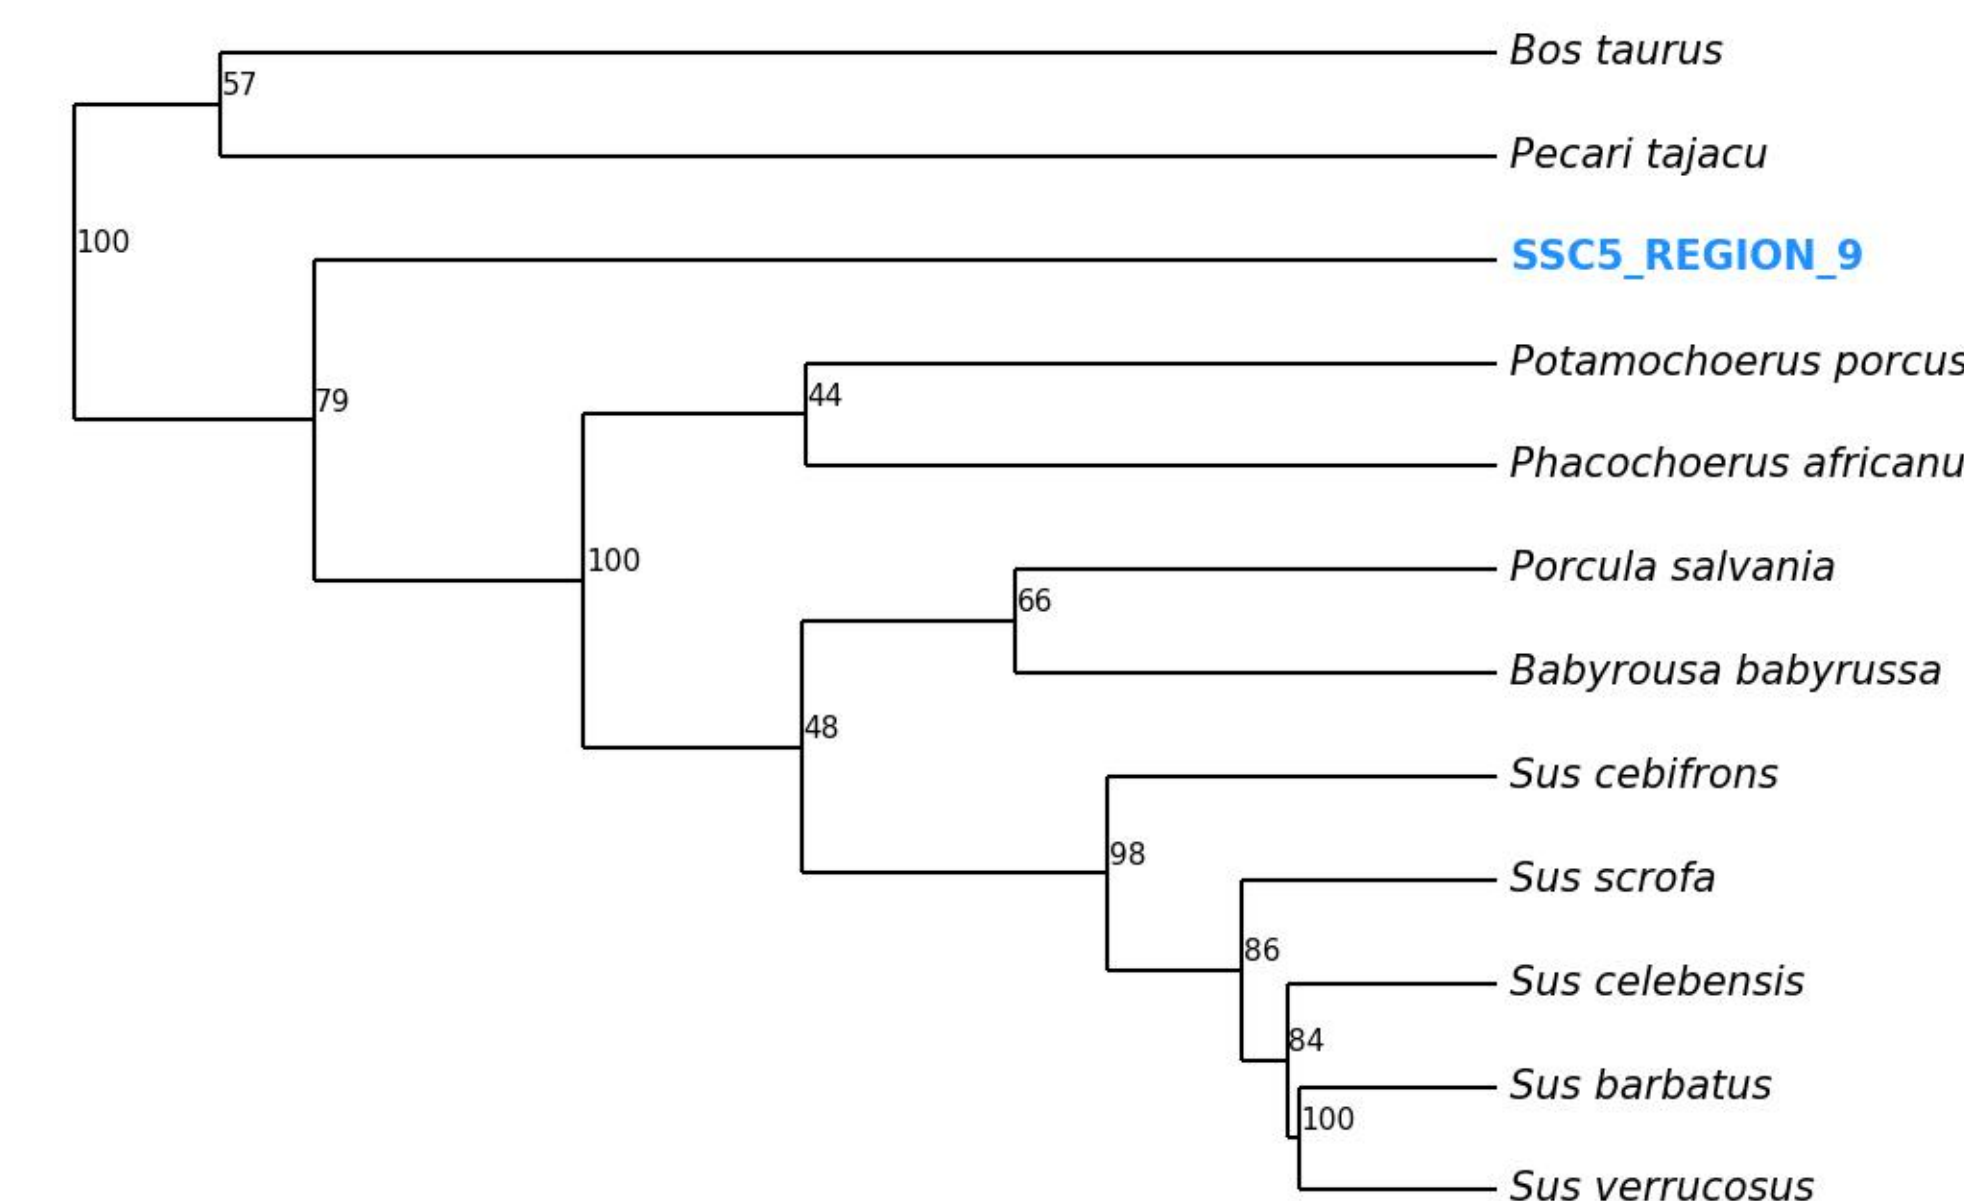

SSC5\_REGION\_12

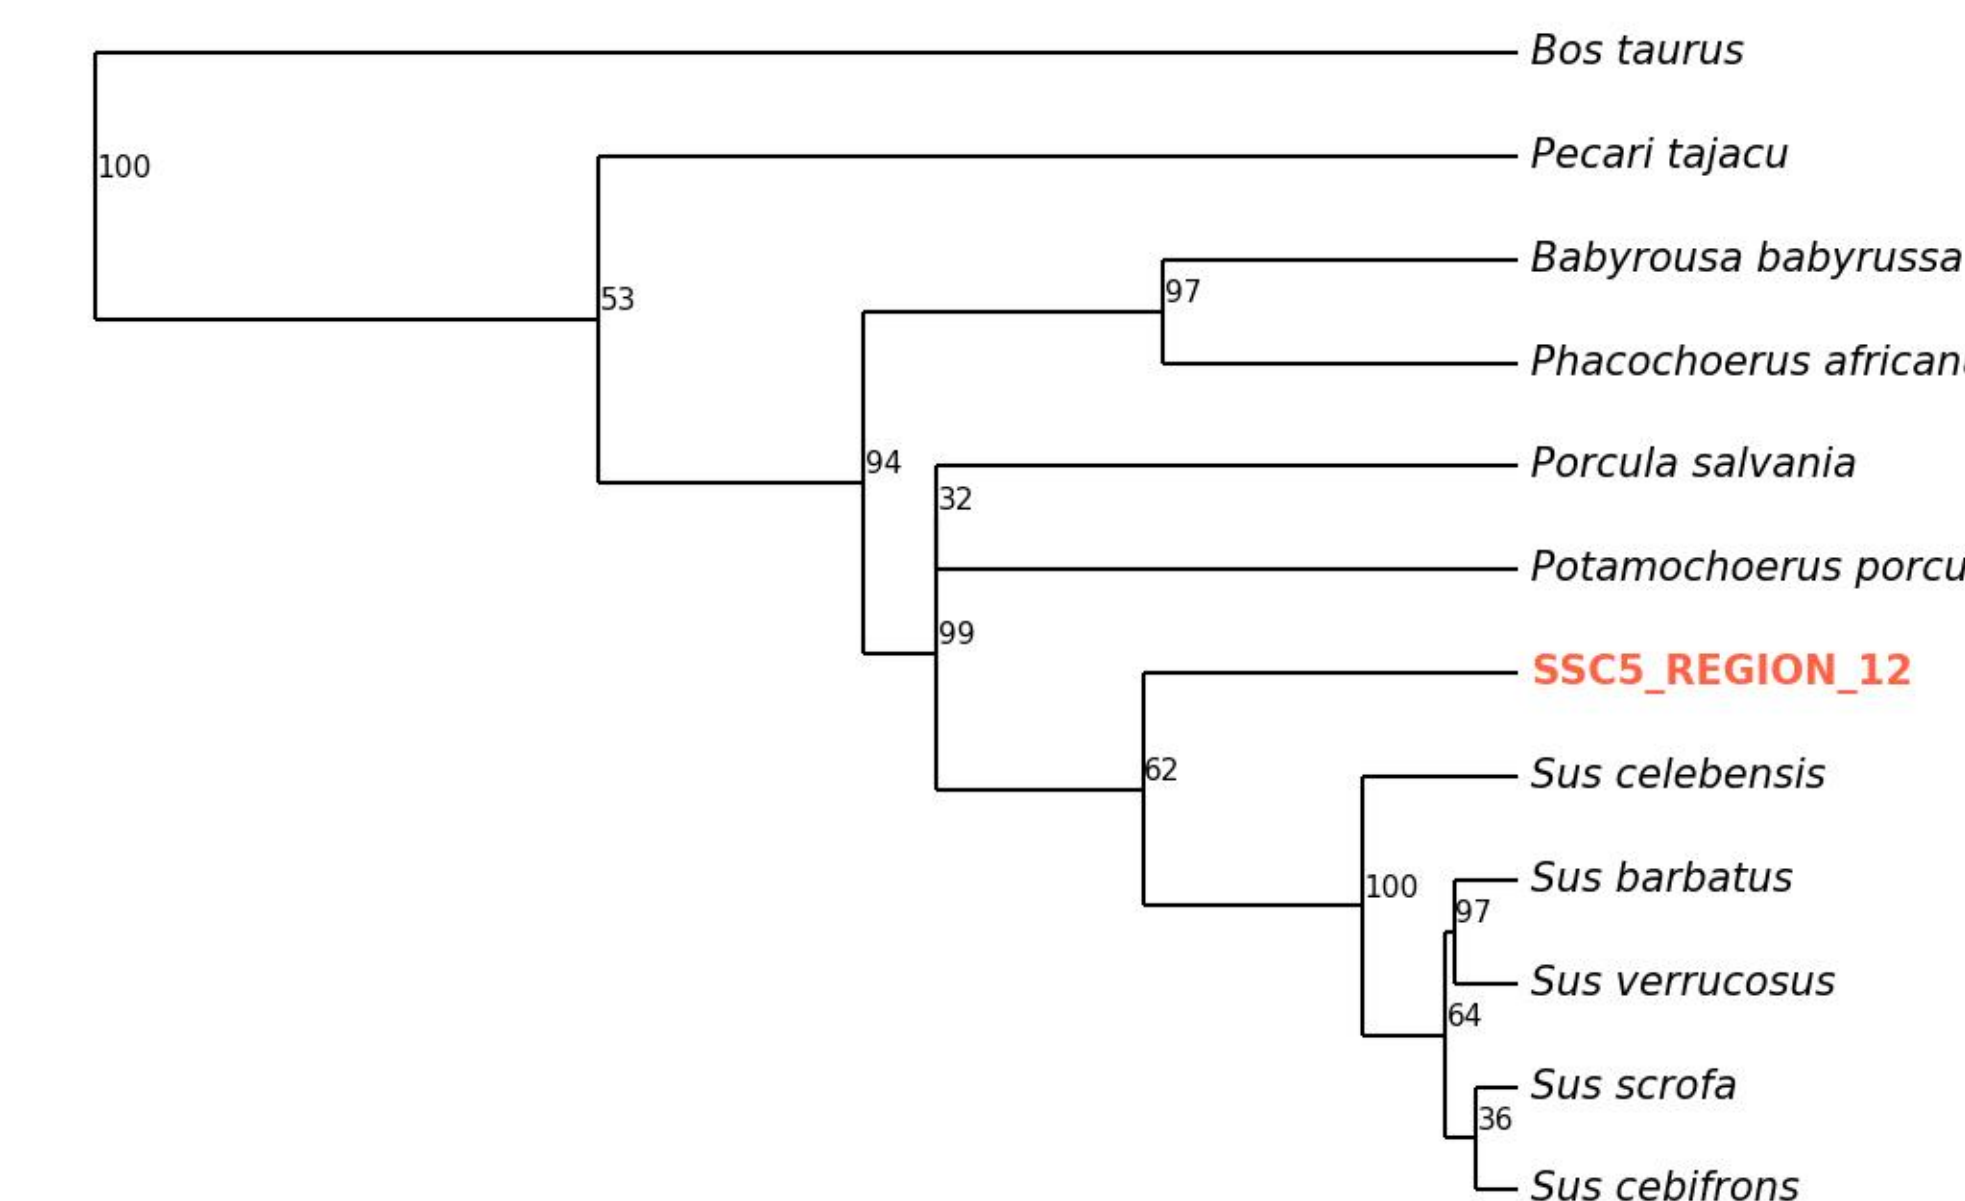

SSC5\_REGION\_13

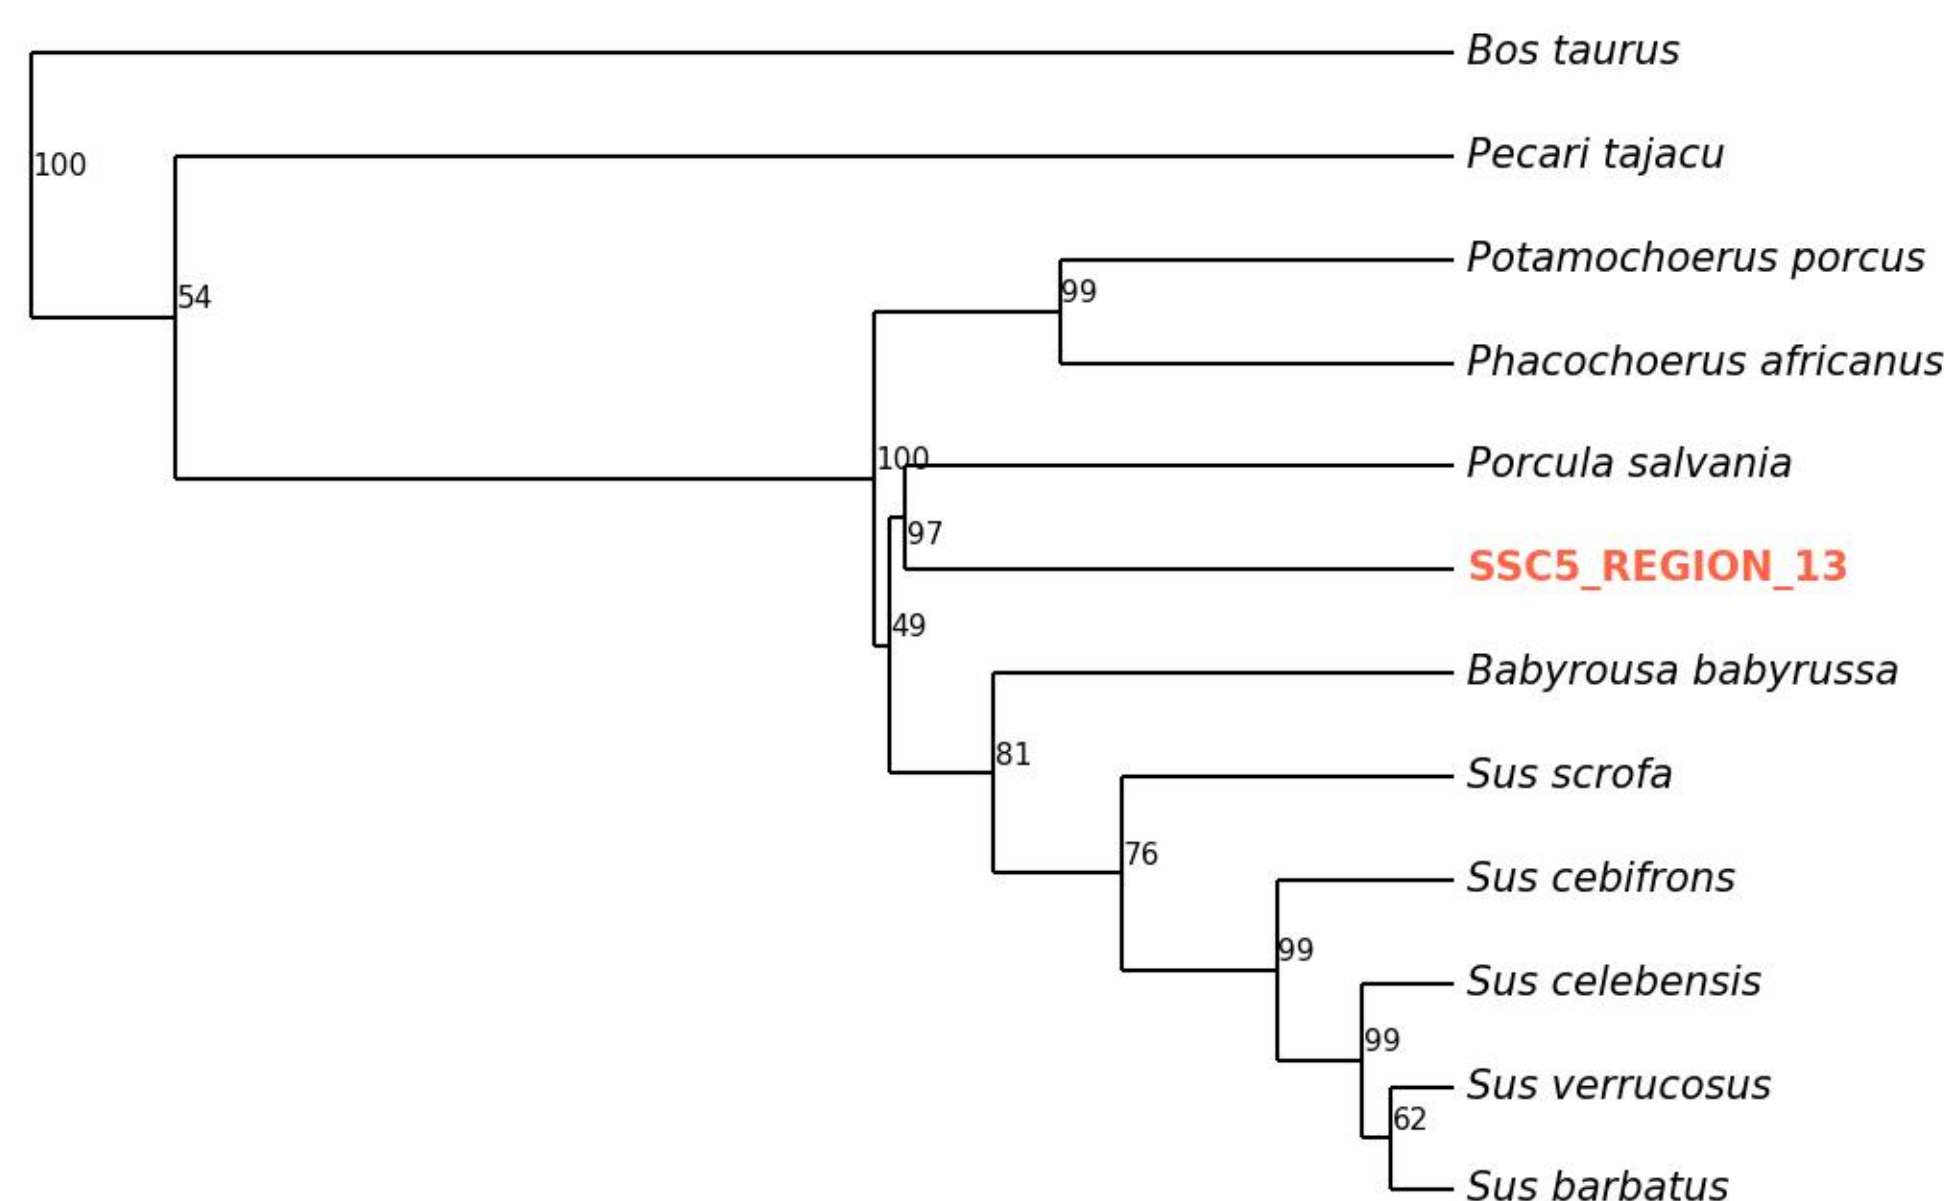

SSC5\_REGION\_15

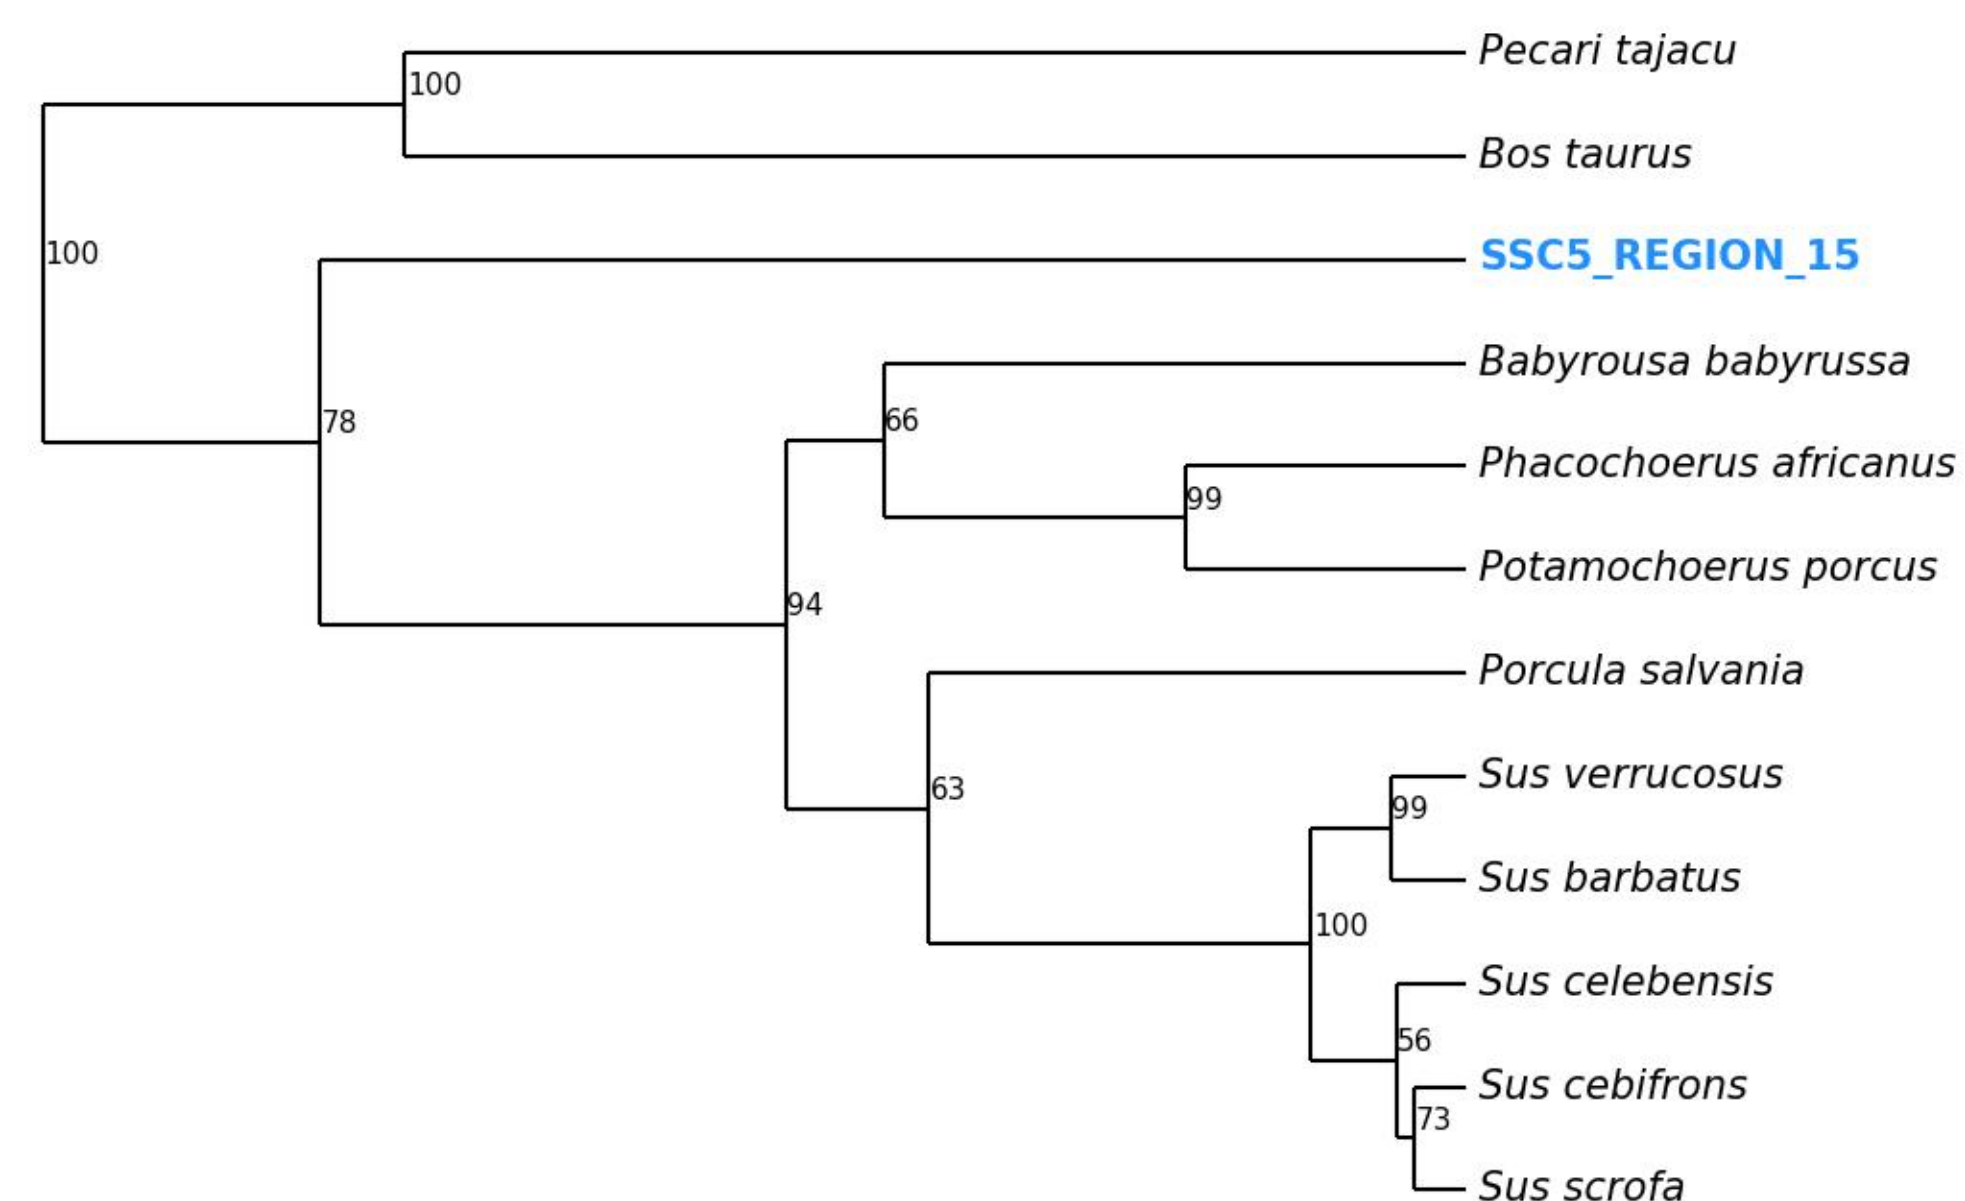

SSC5\_REGION\_17

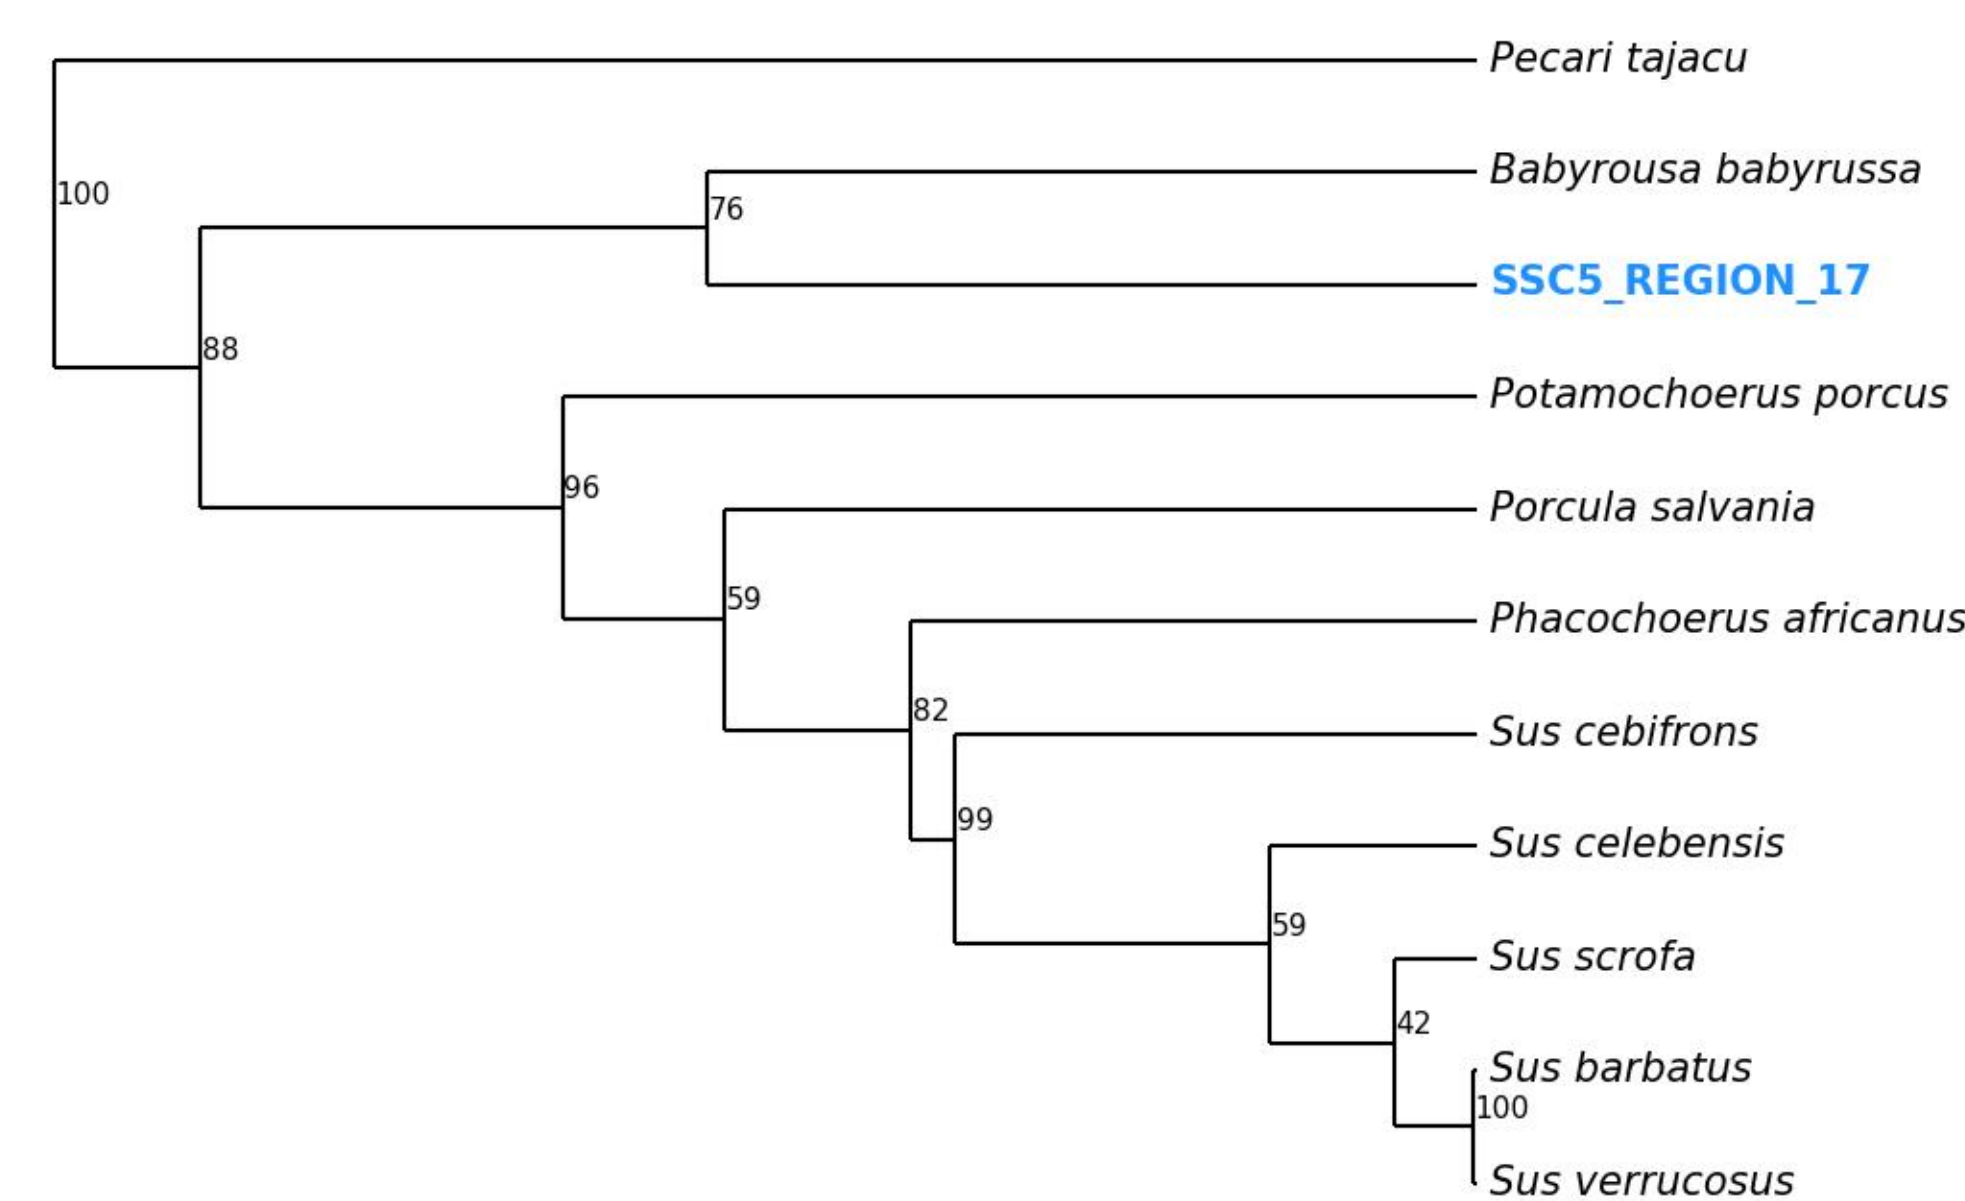

SSC6\_REGION\_8

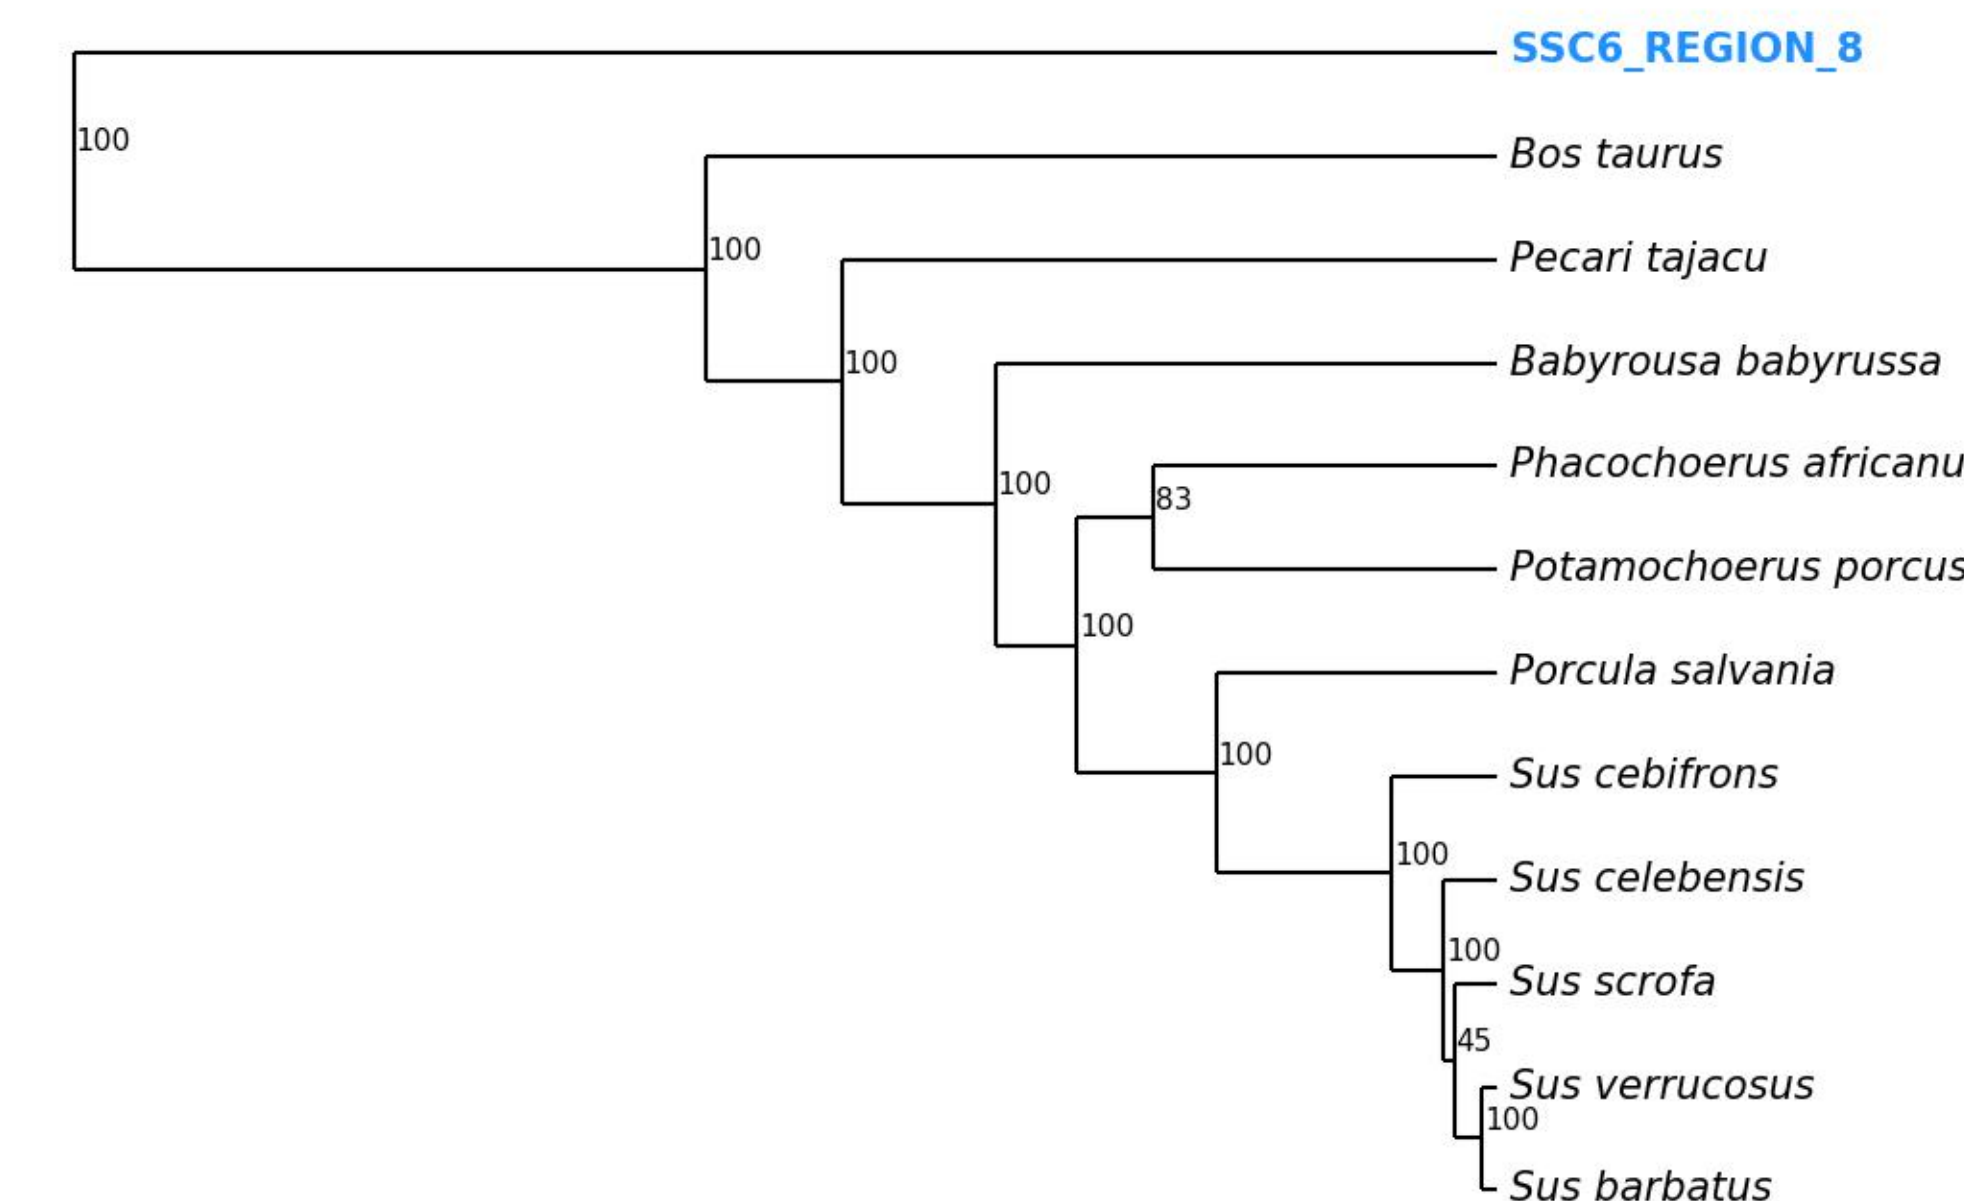

SSC6\_REGION\_10

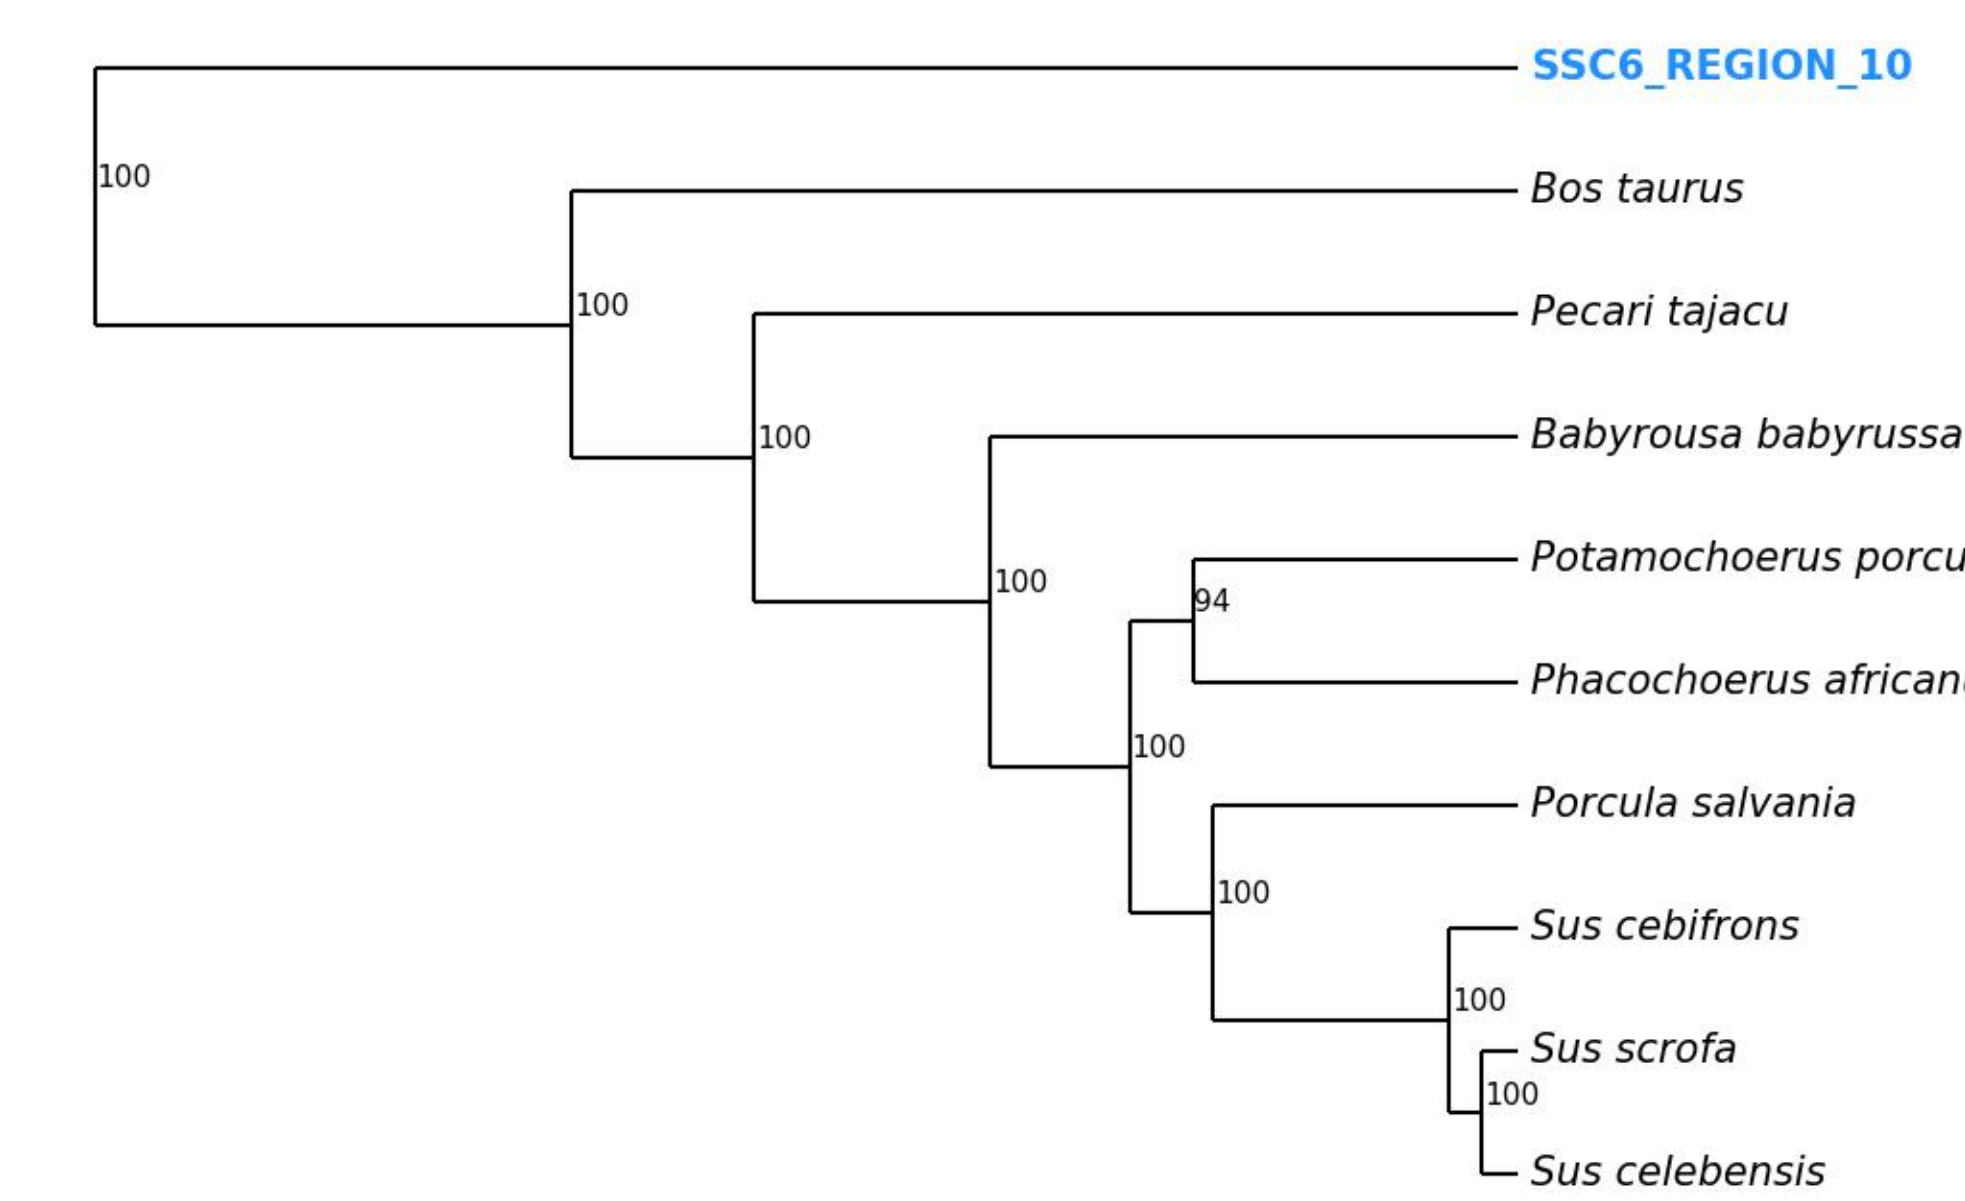



SSC8\_REGION\_3

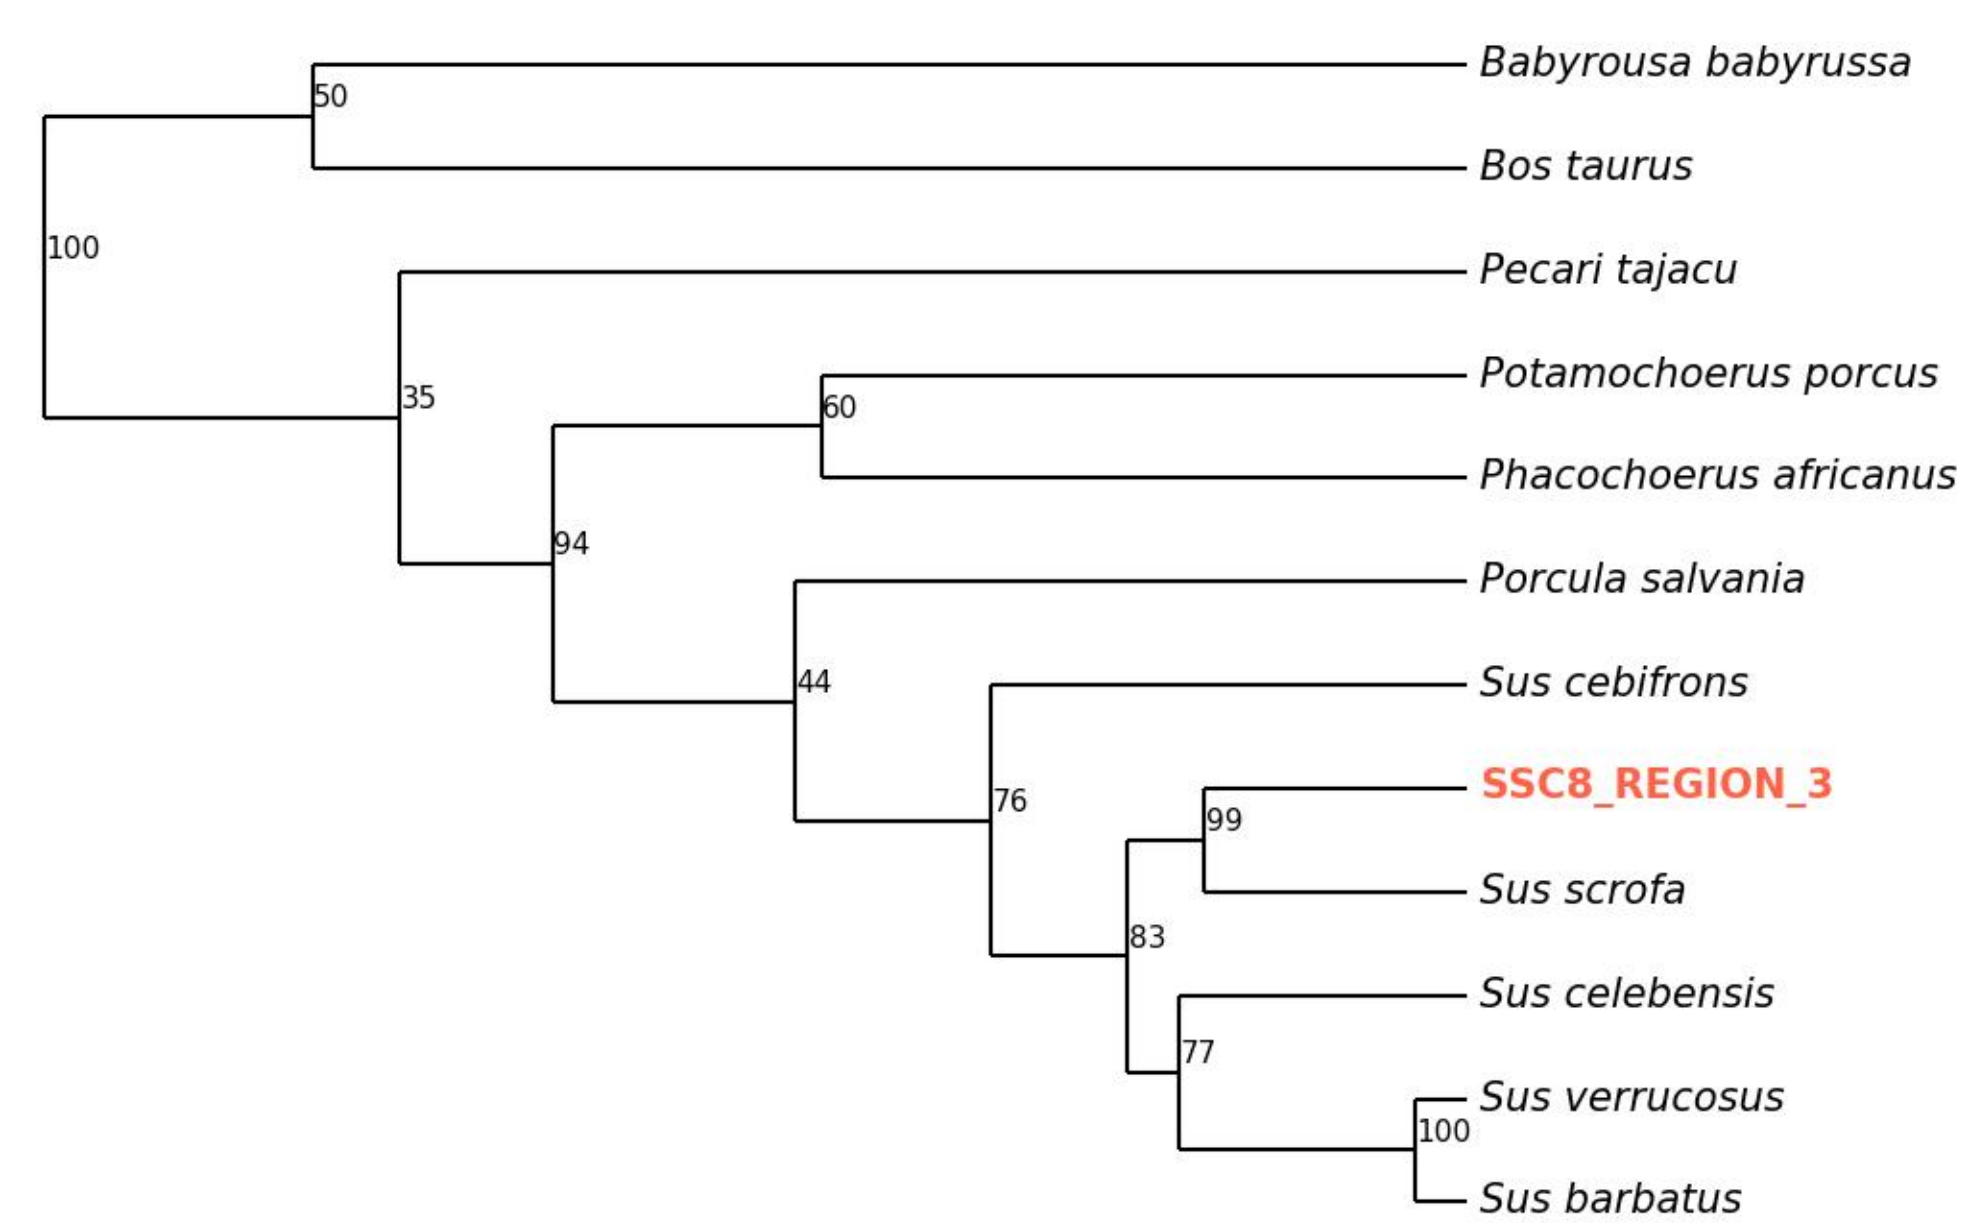

SSC8\_REGION\_4

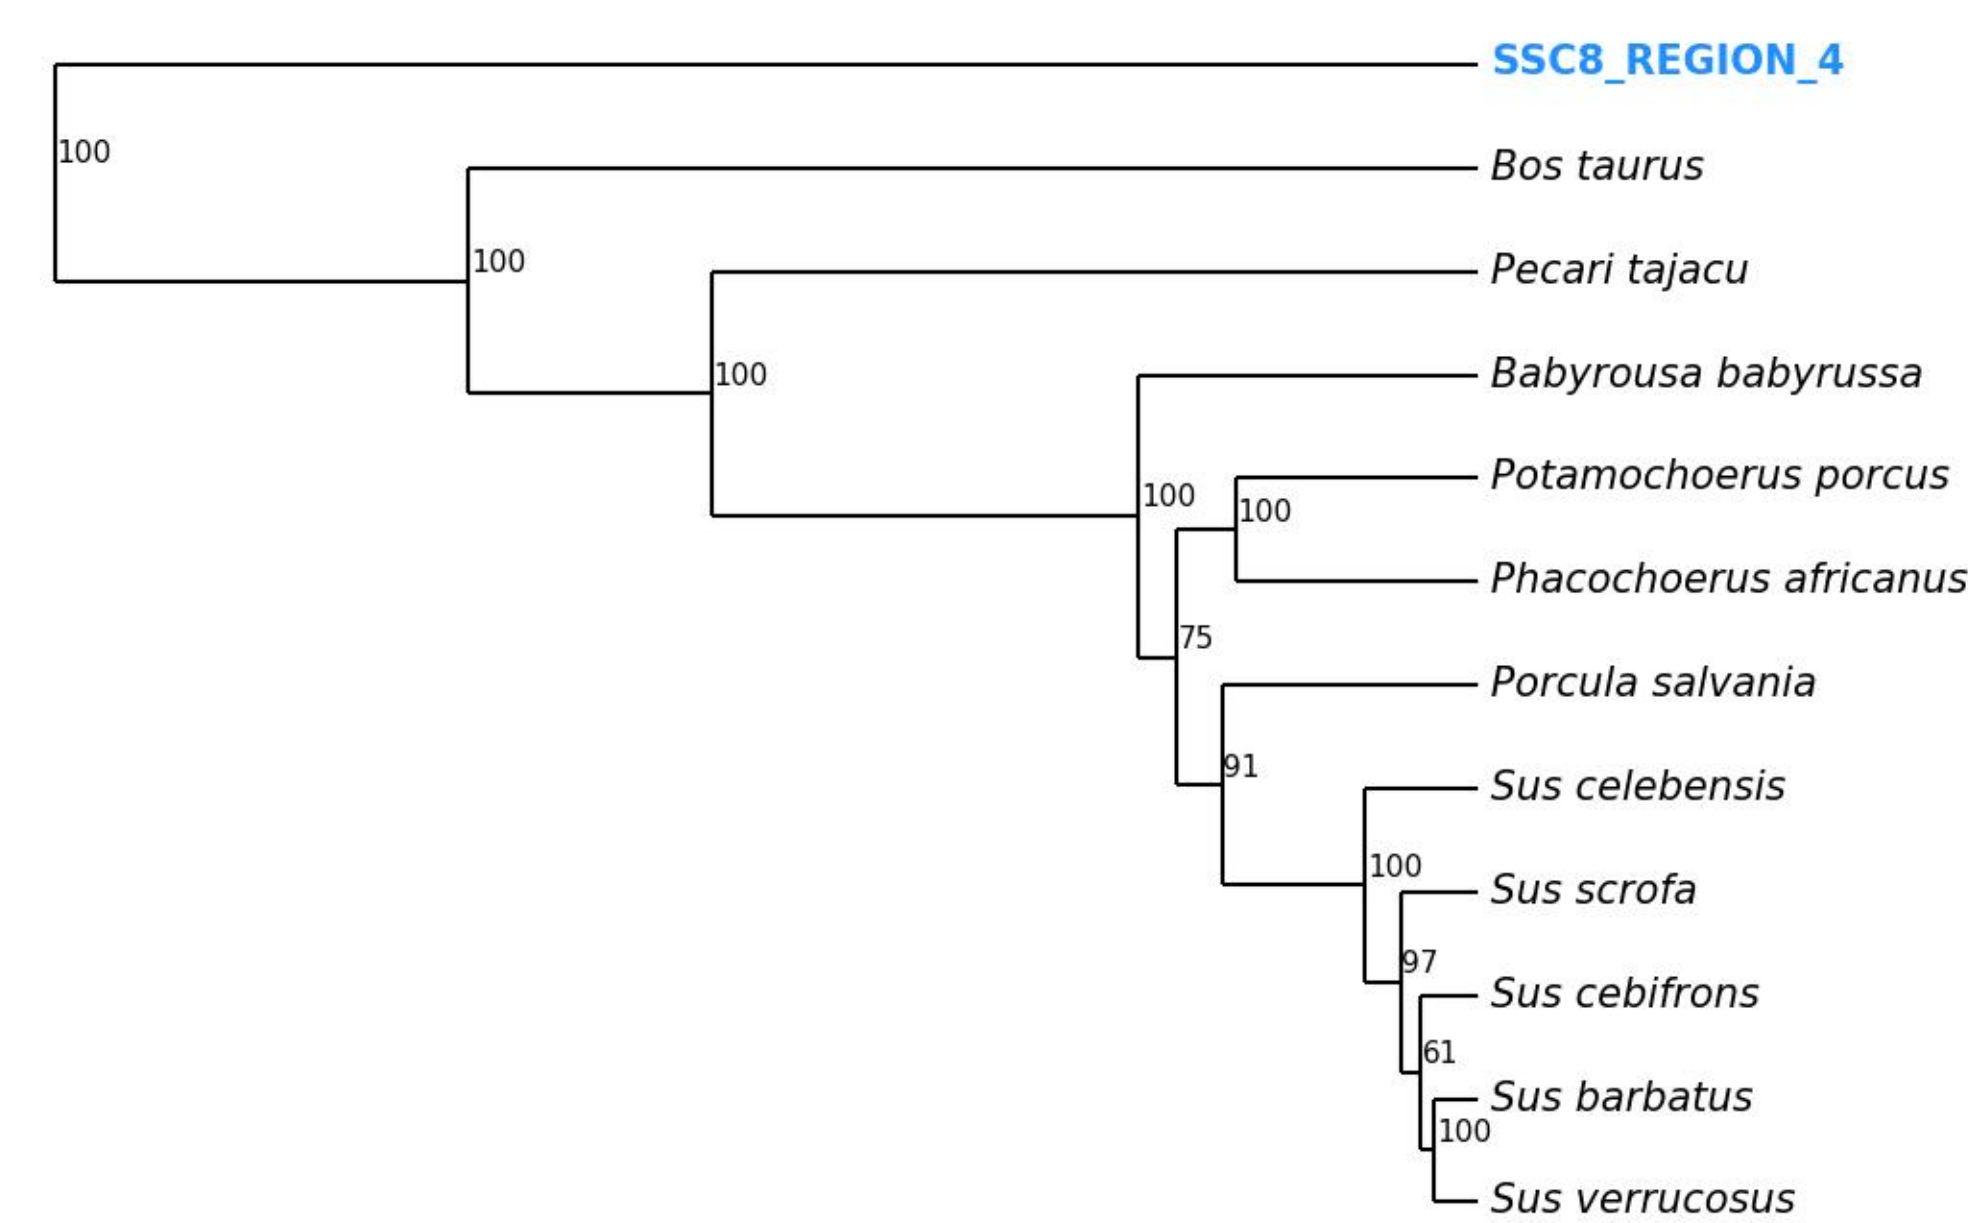

SSC8\_REGION\_5

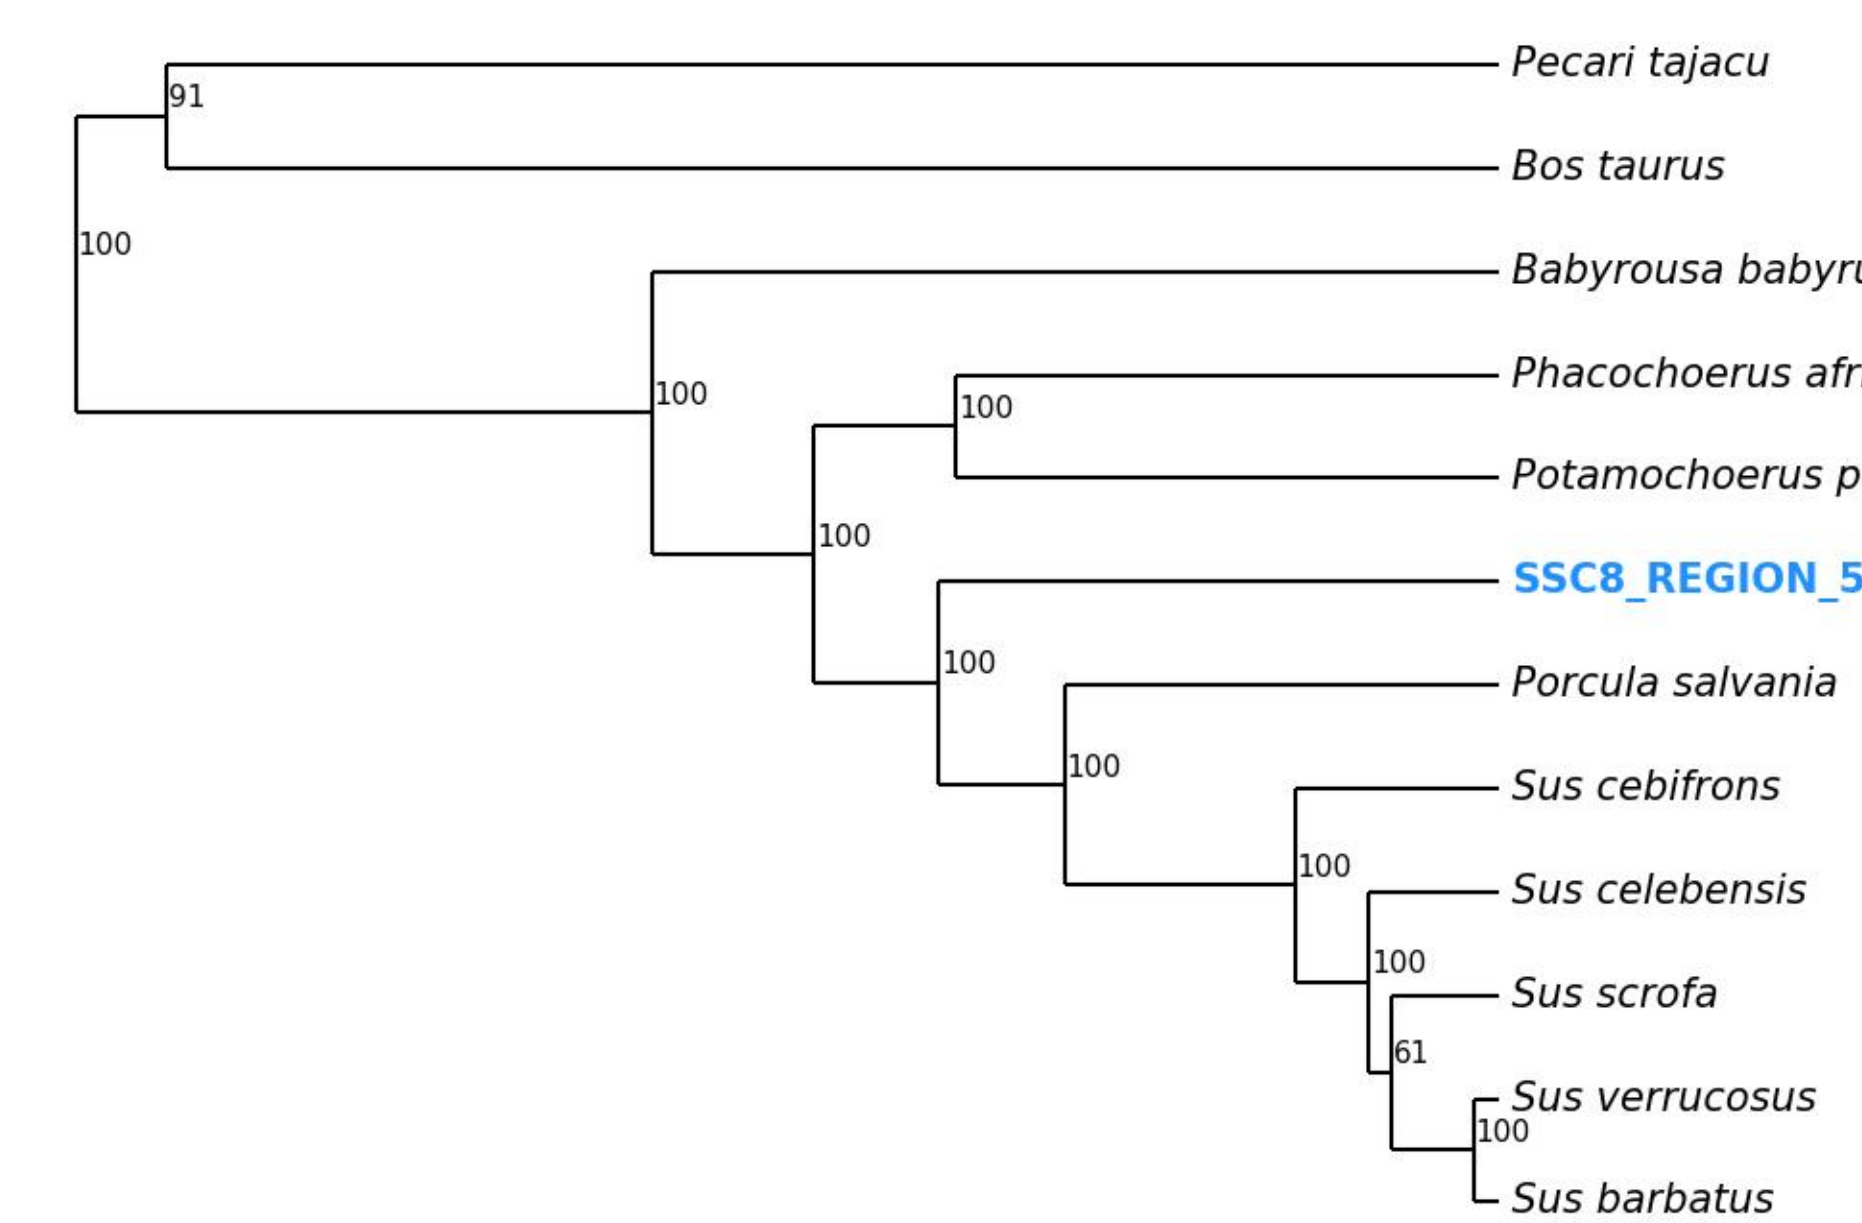

SSC8\_REGION\_6

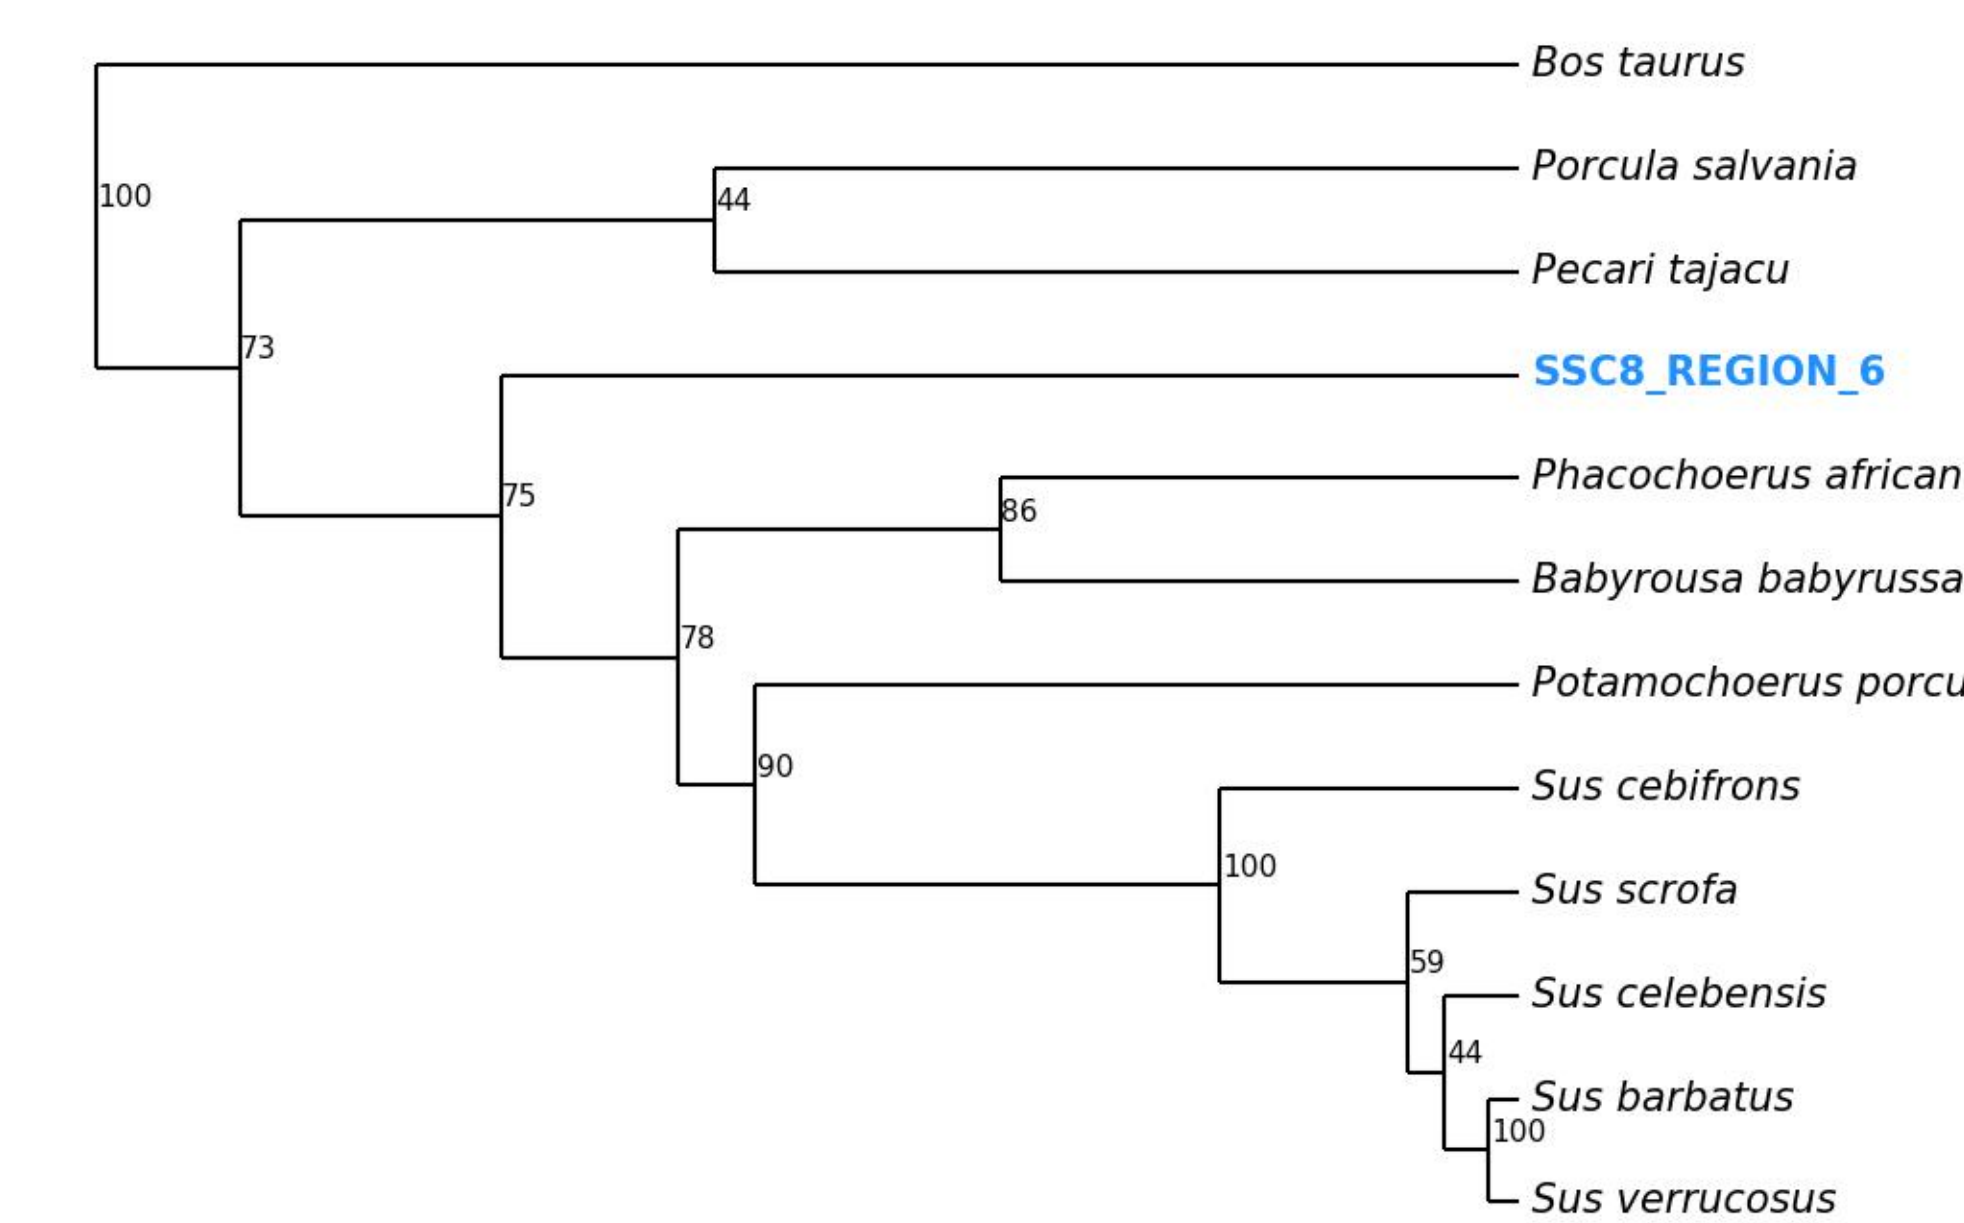

SSC8\_REGION\_7

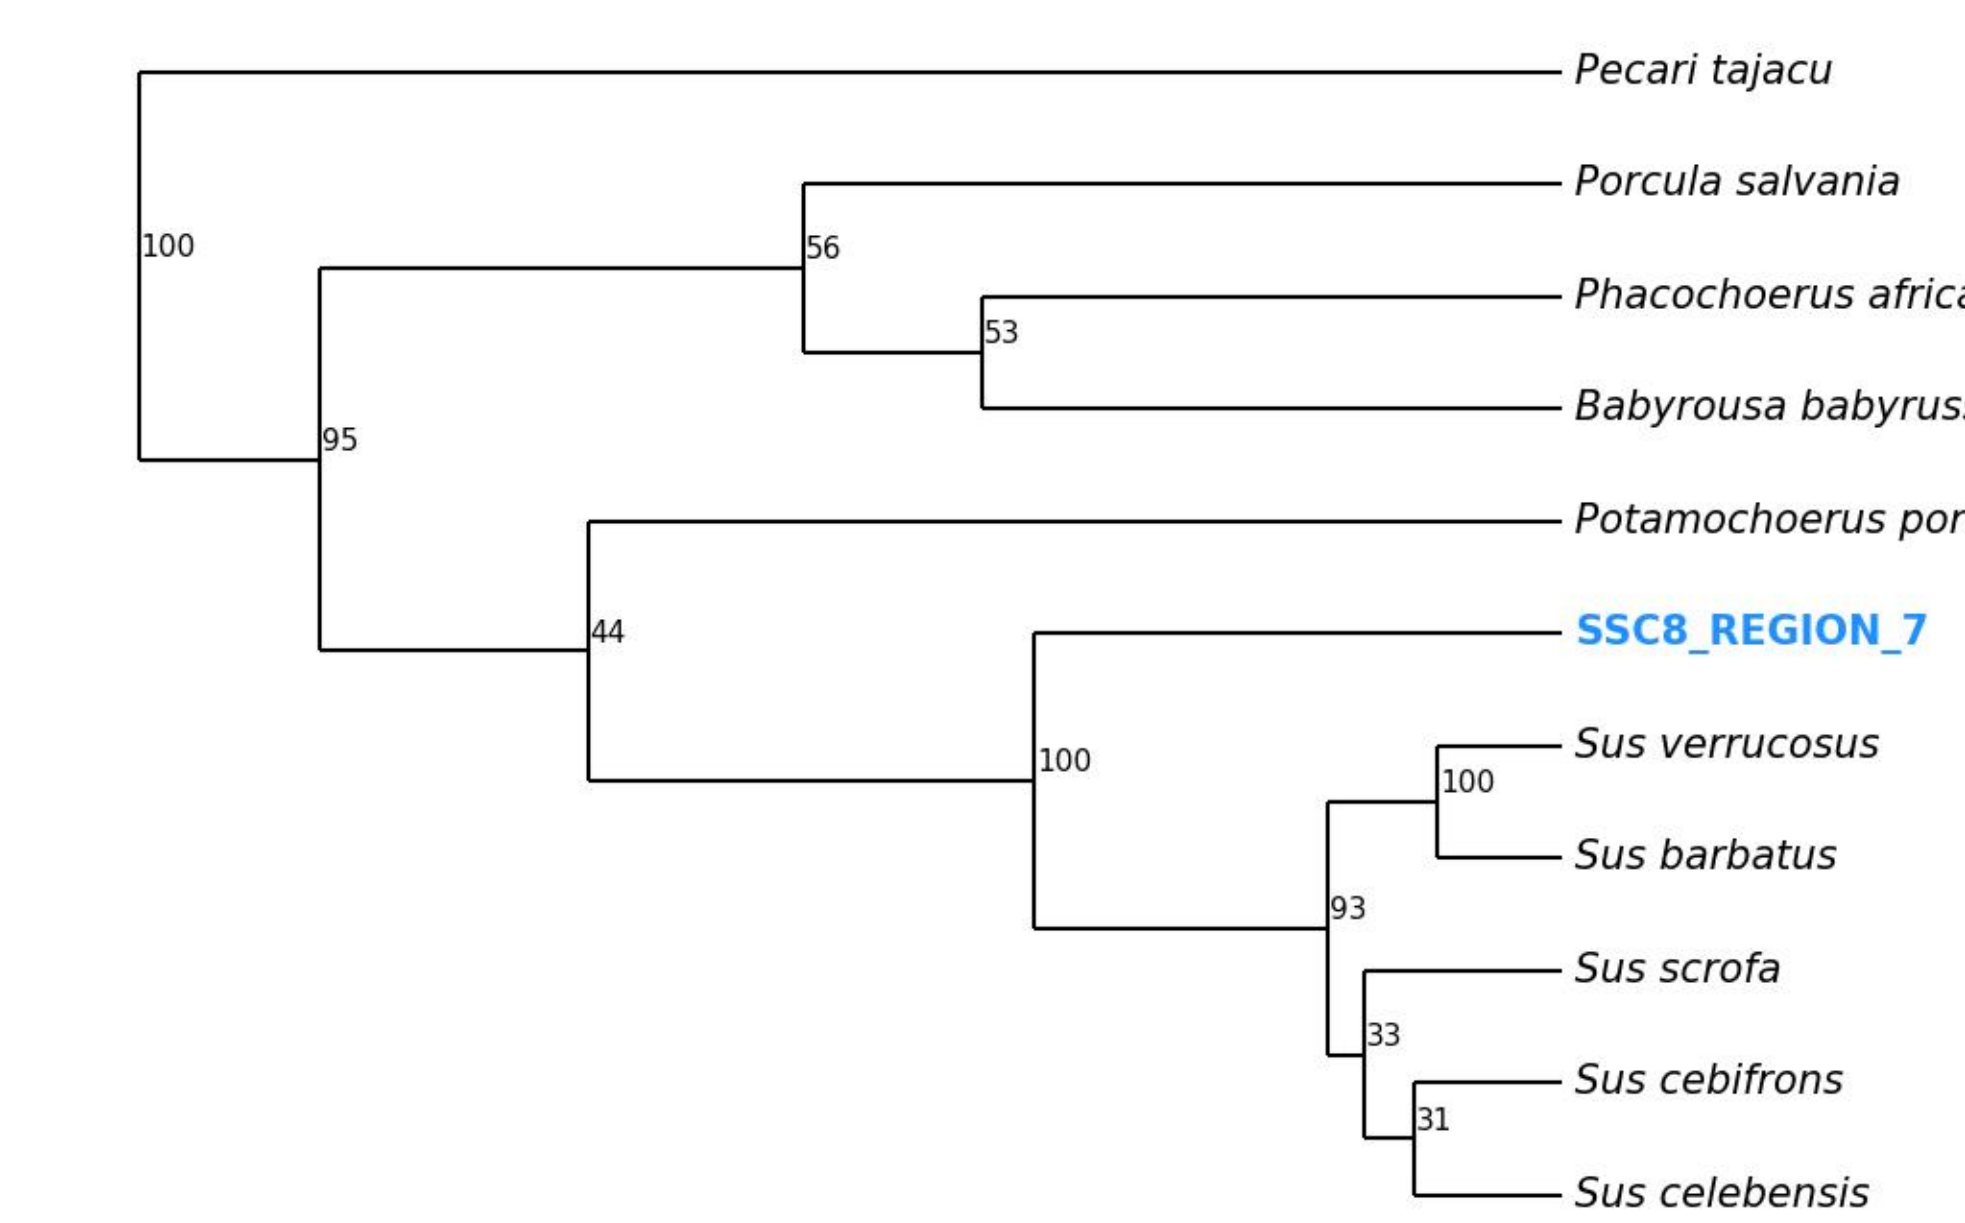

SSC8\_REGION\_9

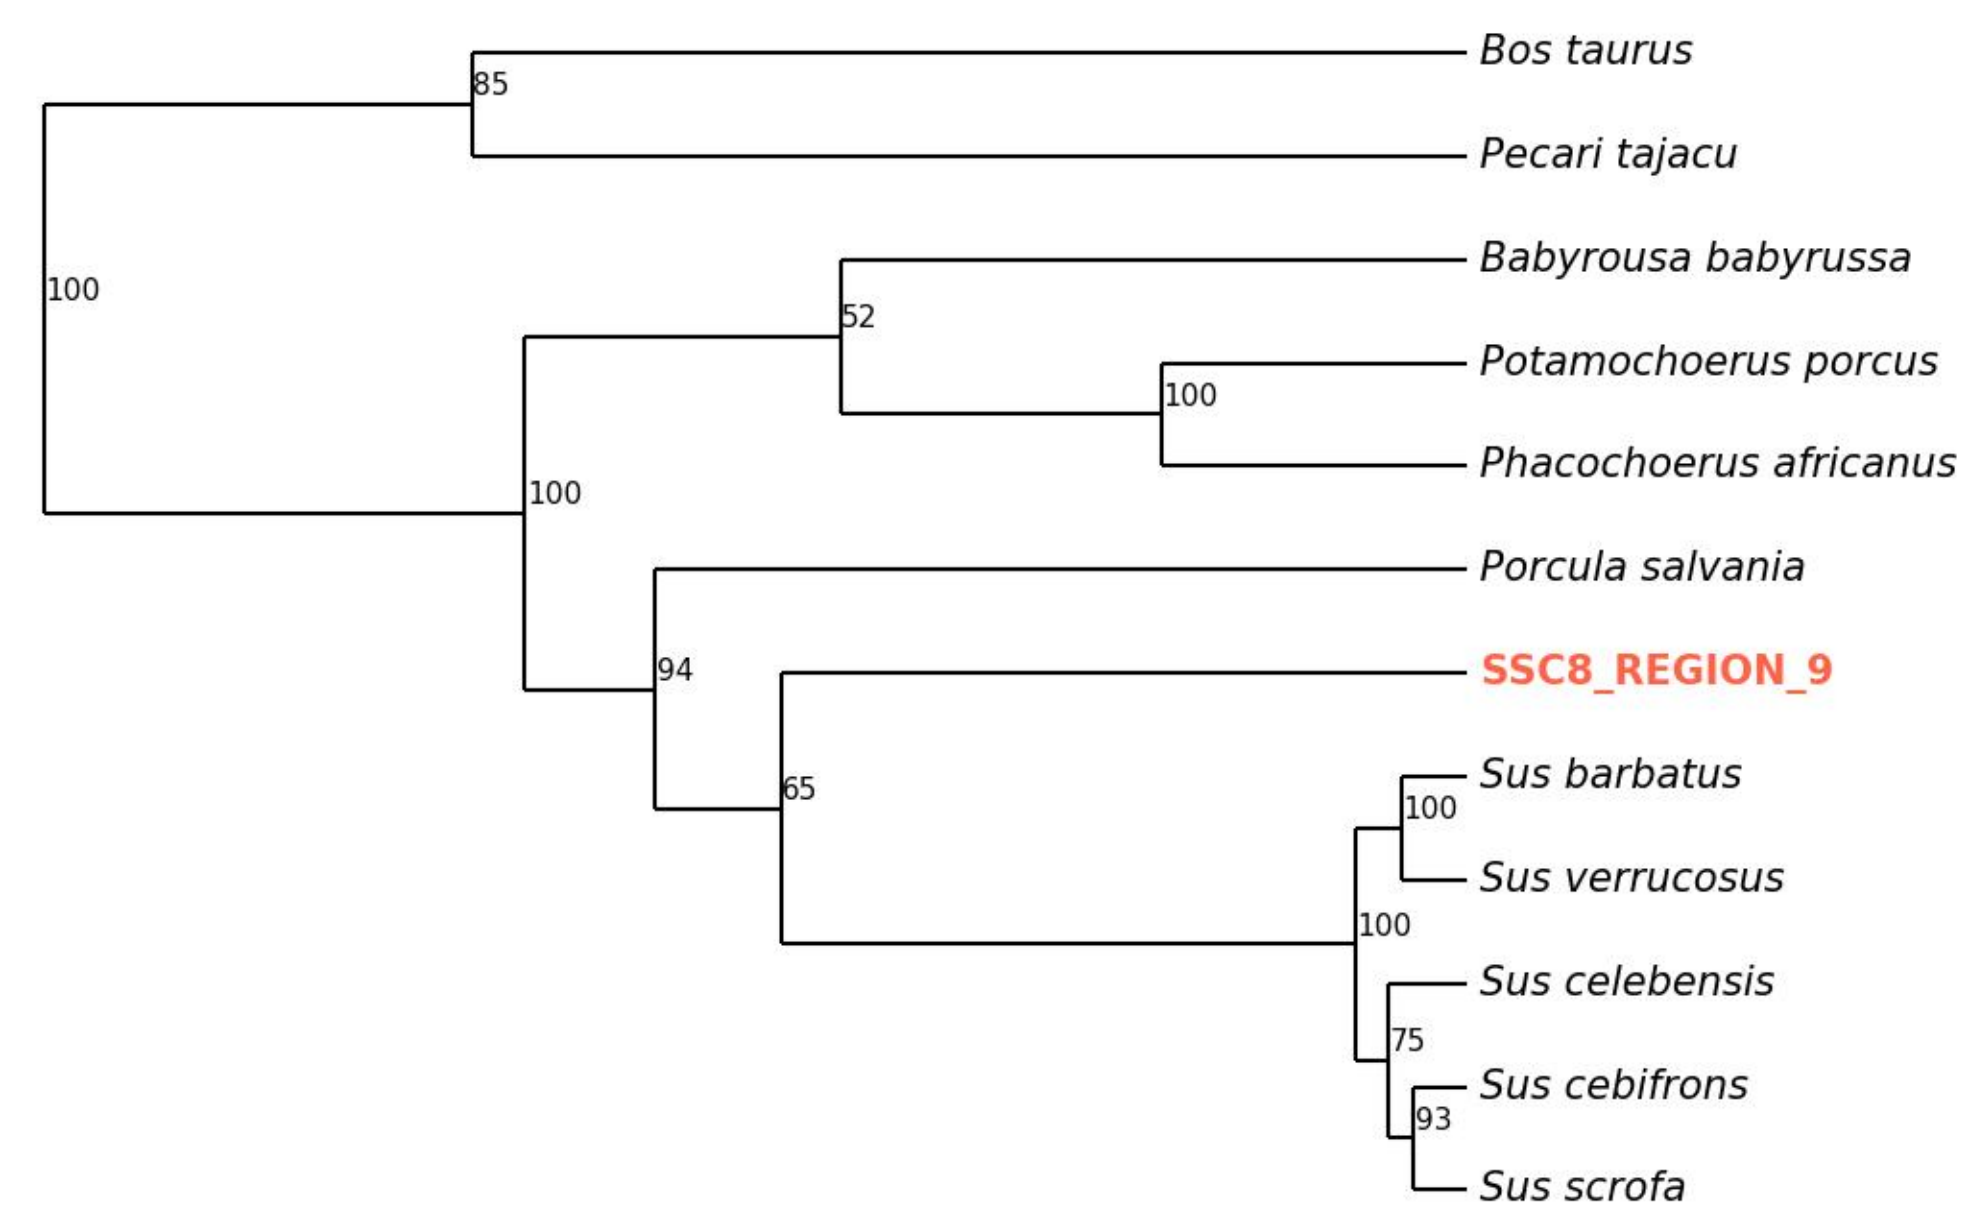

SSC8\_REGION\_11

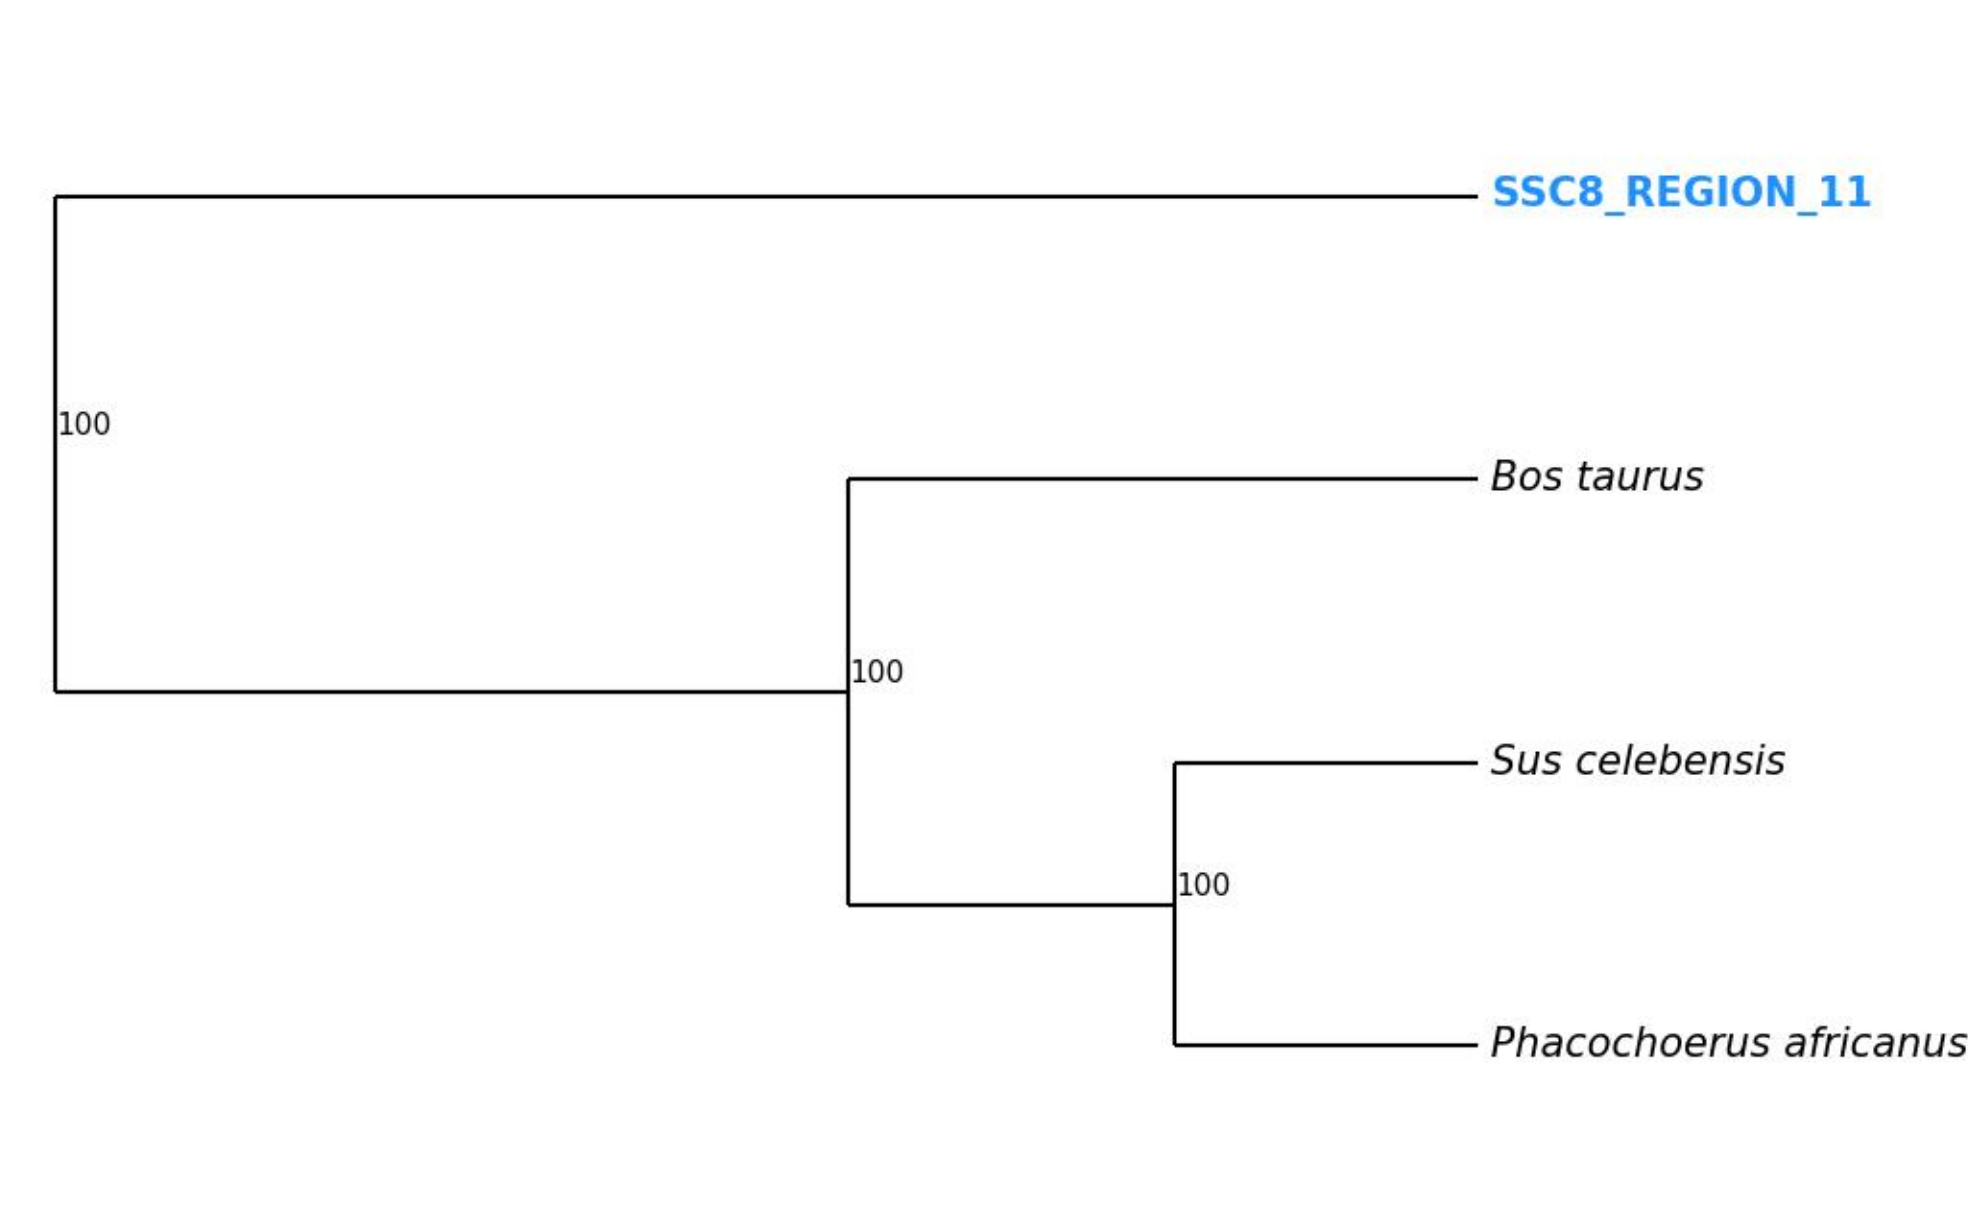

SSC8\_REGION\_13

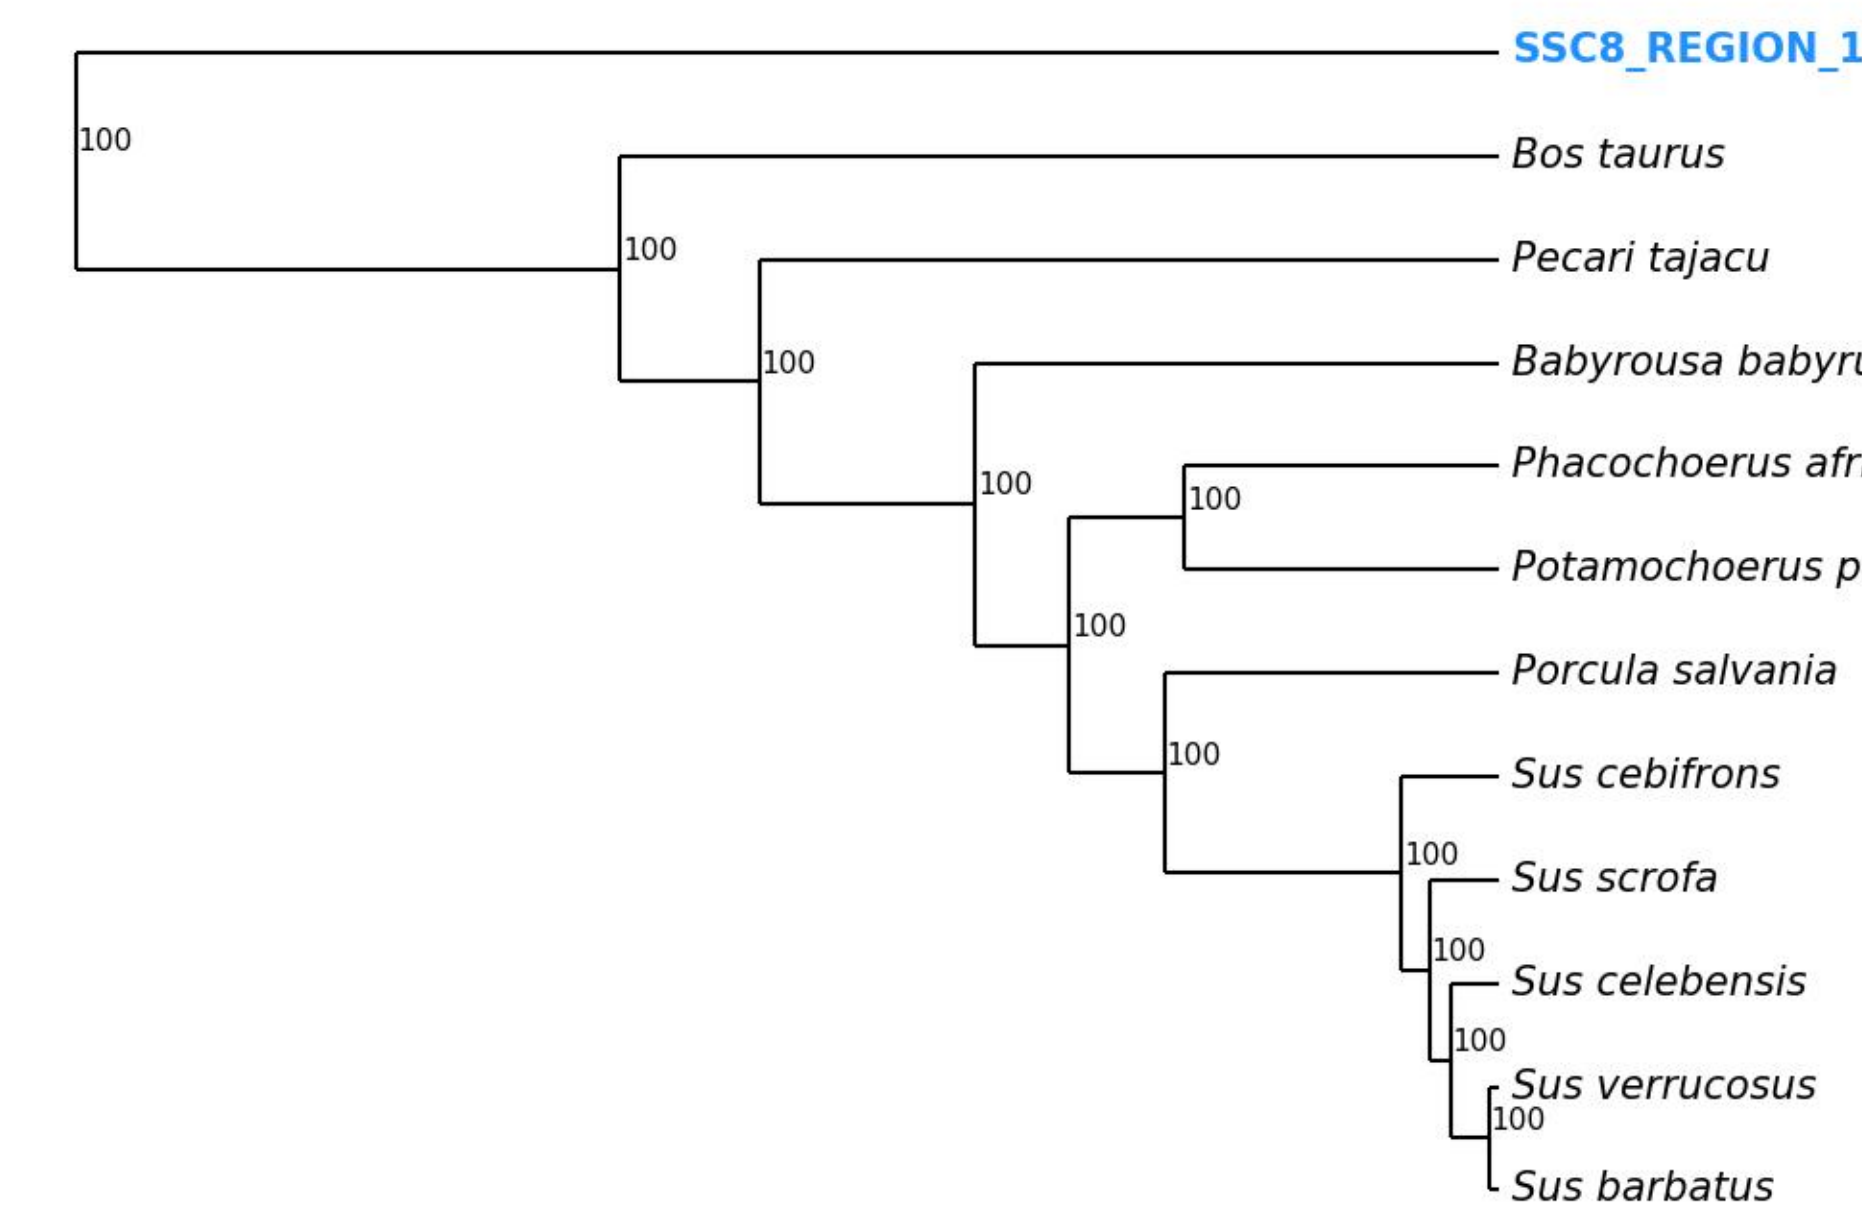

SSC8\_REGION\_15

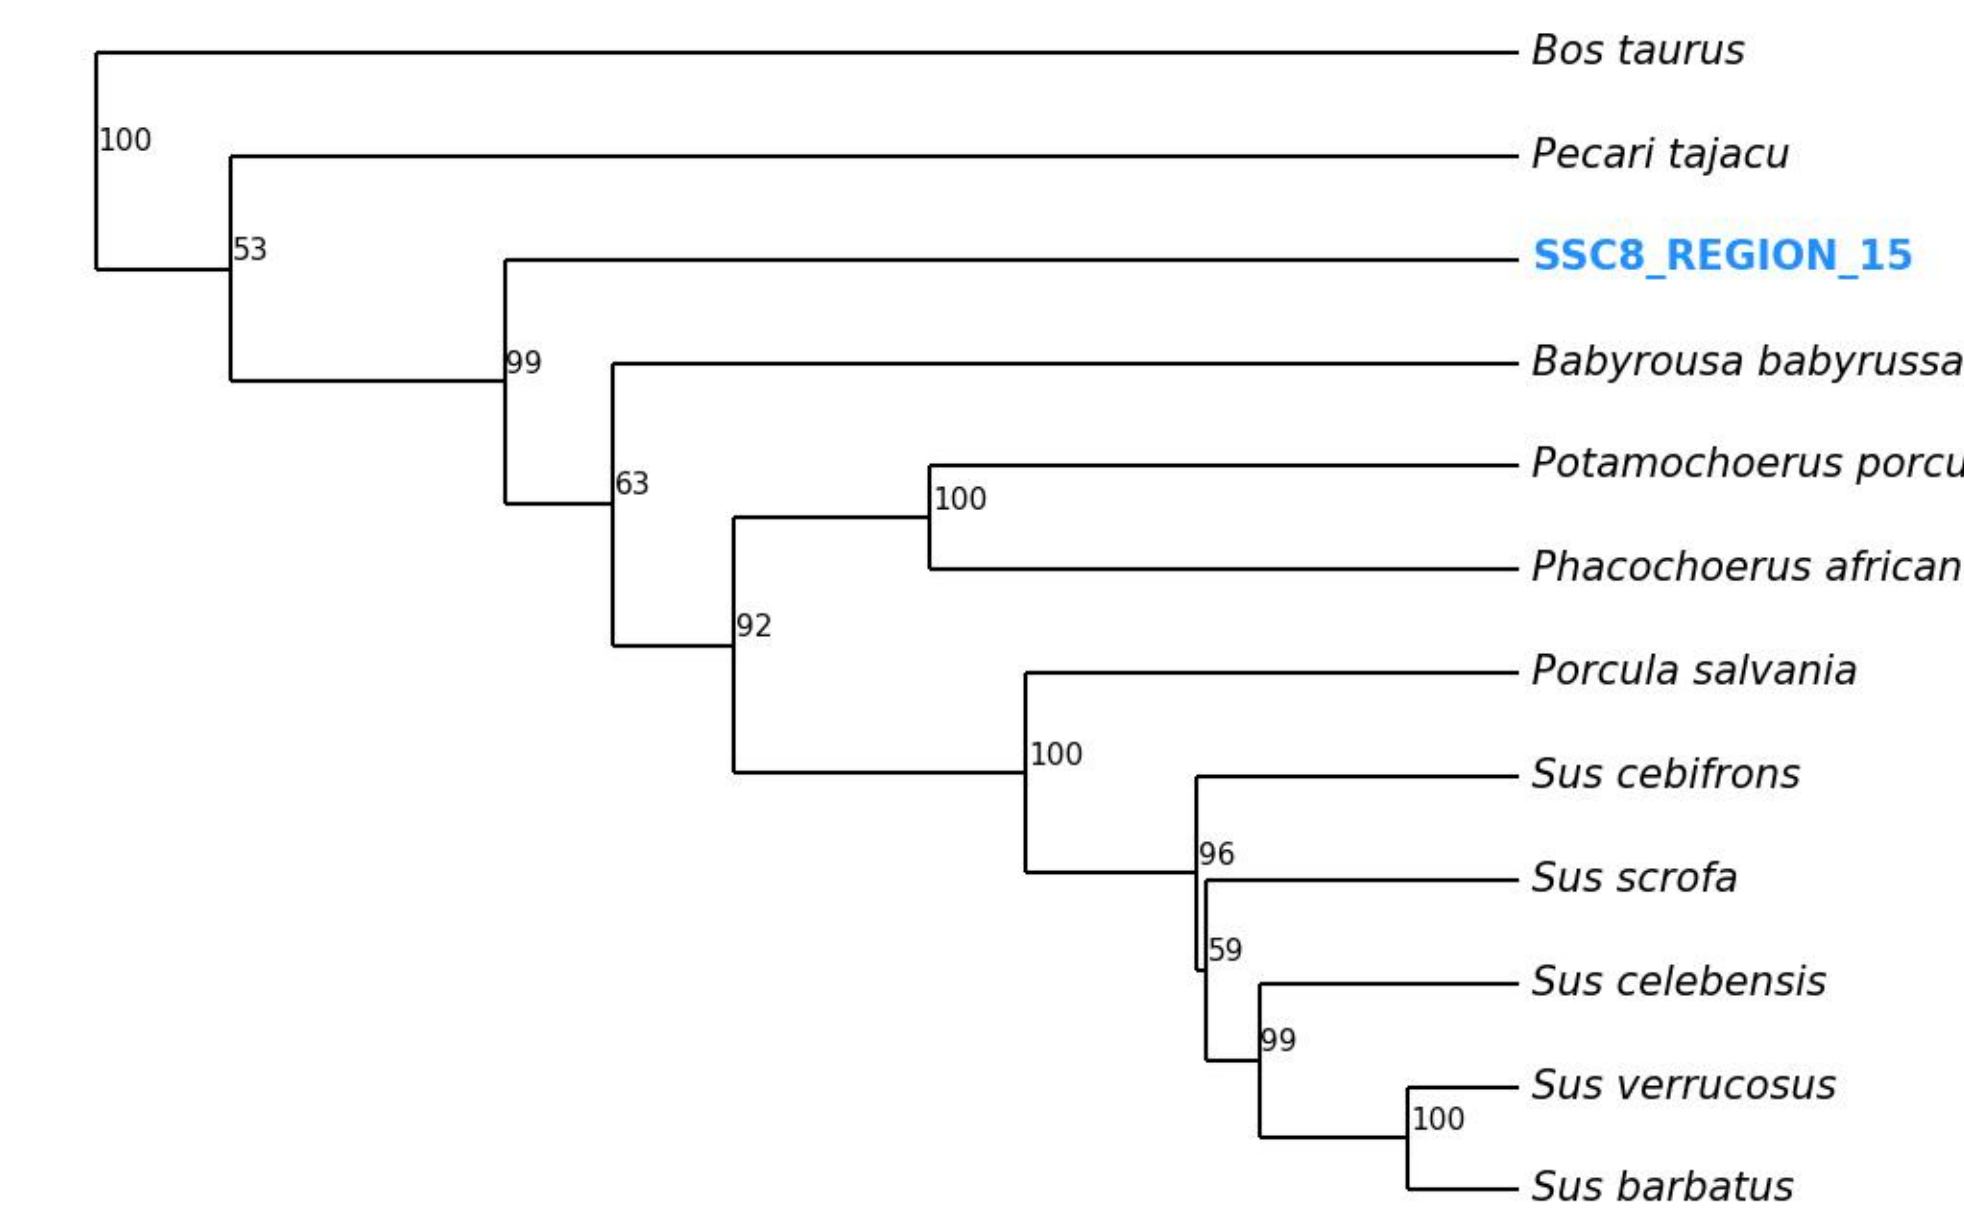

SSC8\_REGION\_17

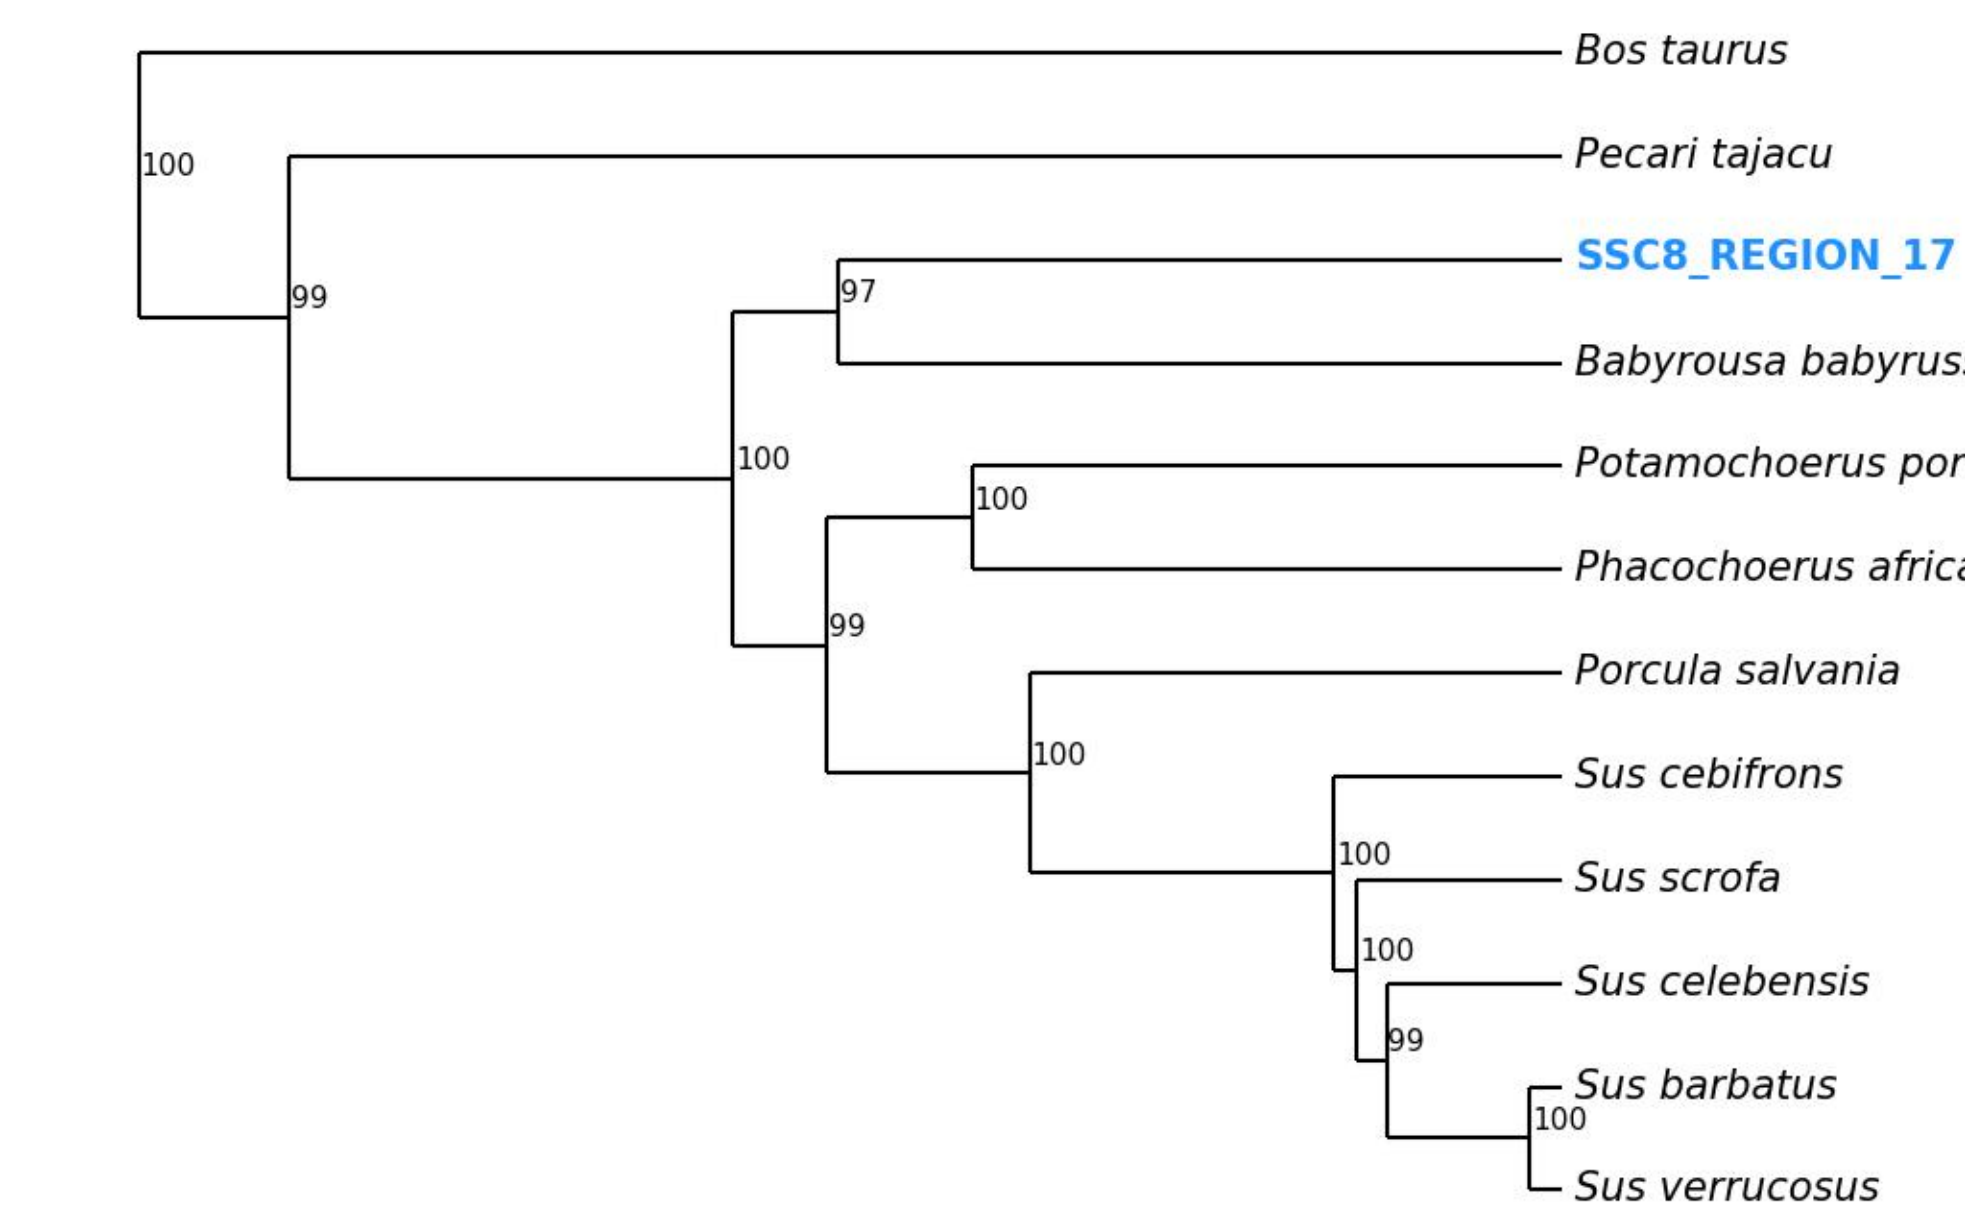

SSC9\_REGION\_5

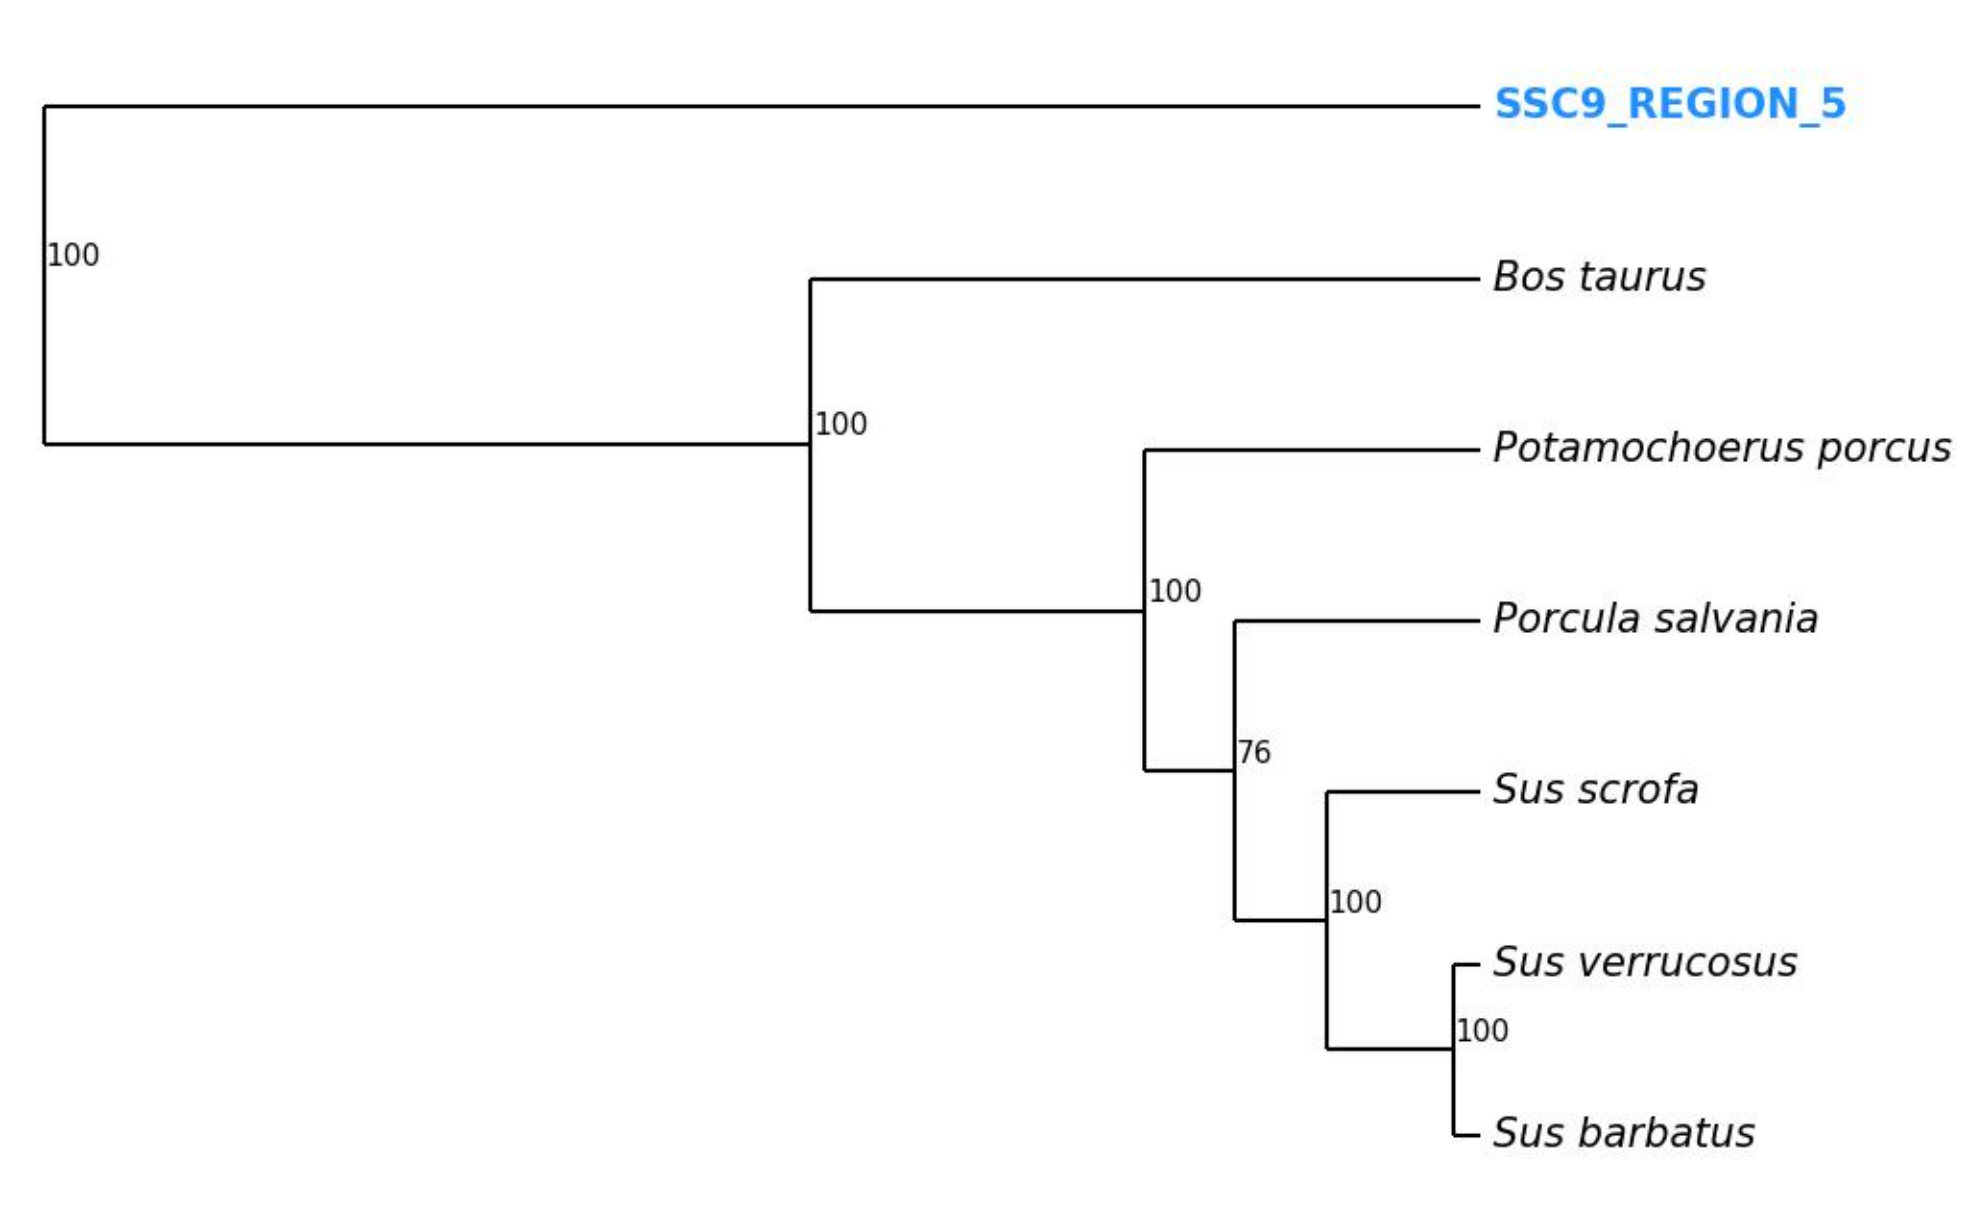

SSC9\_REGION\_7

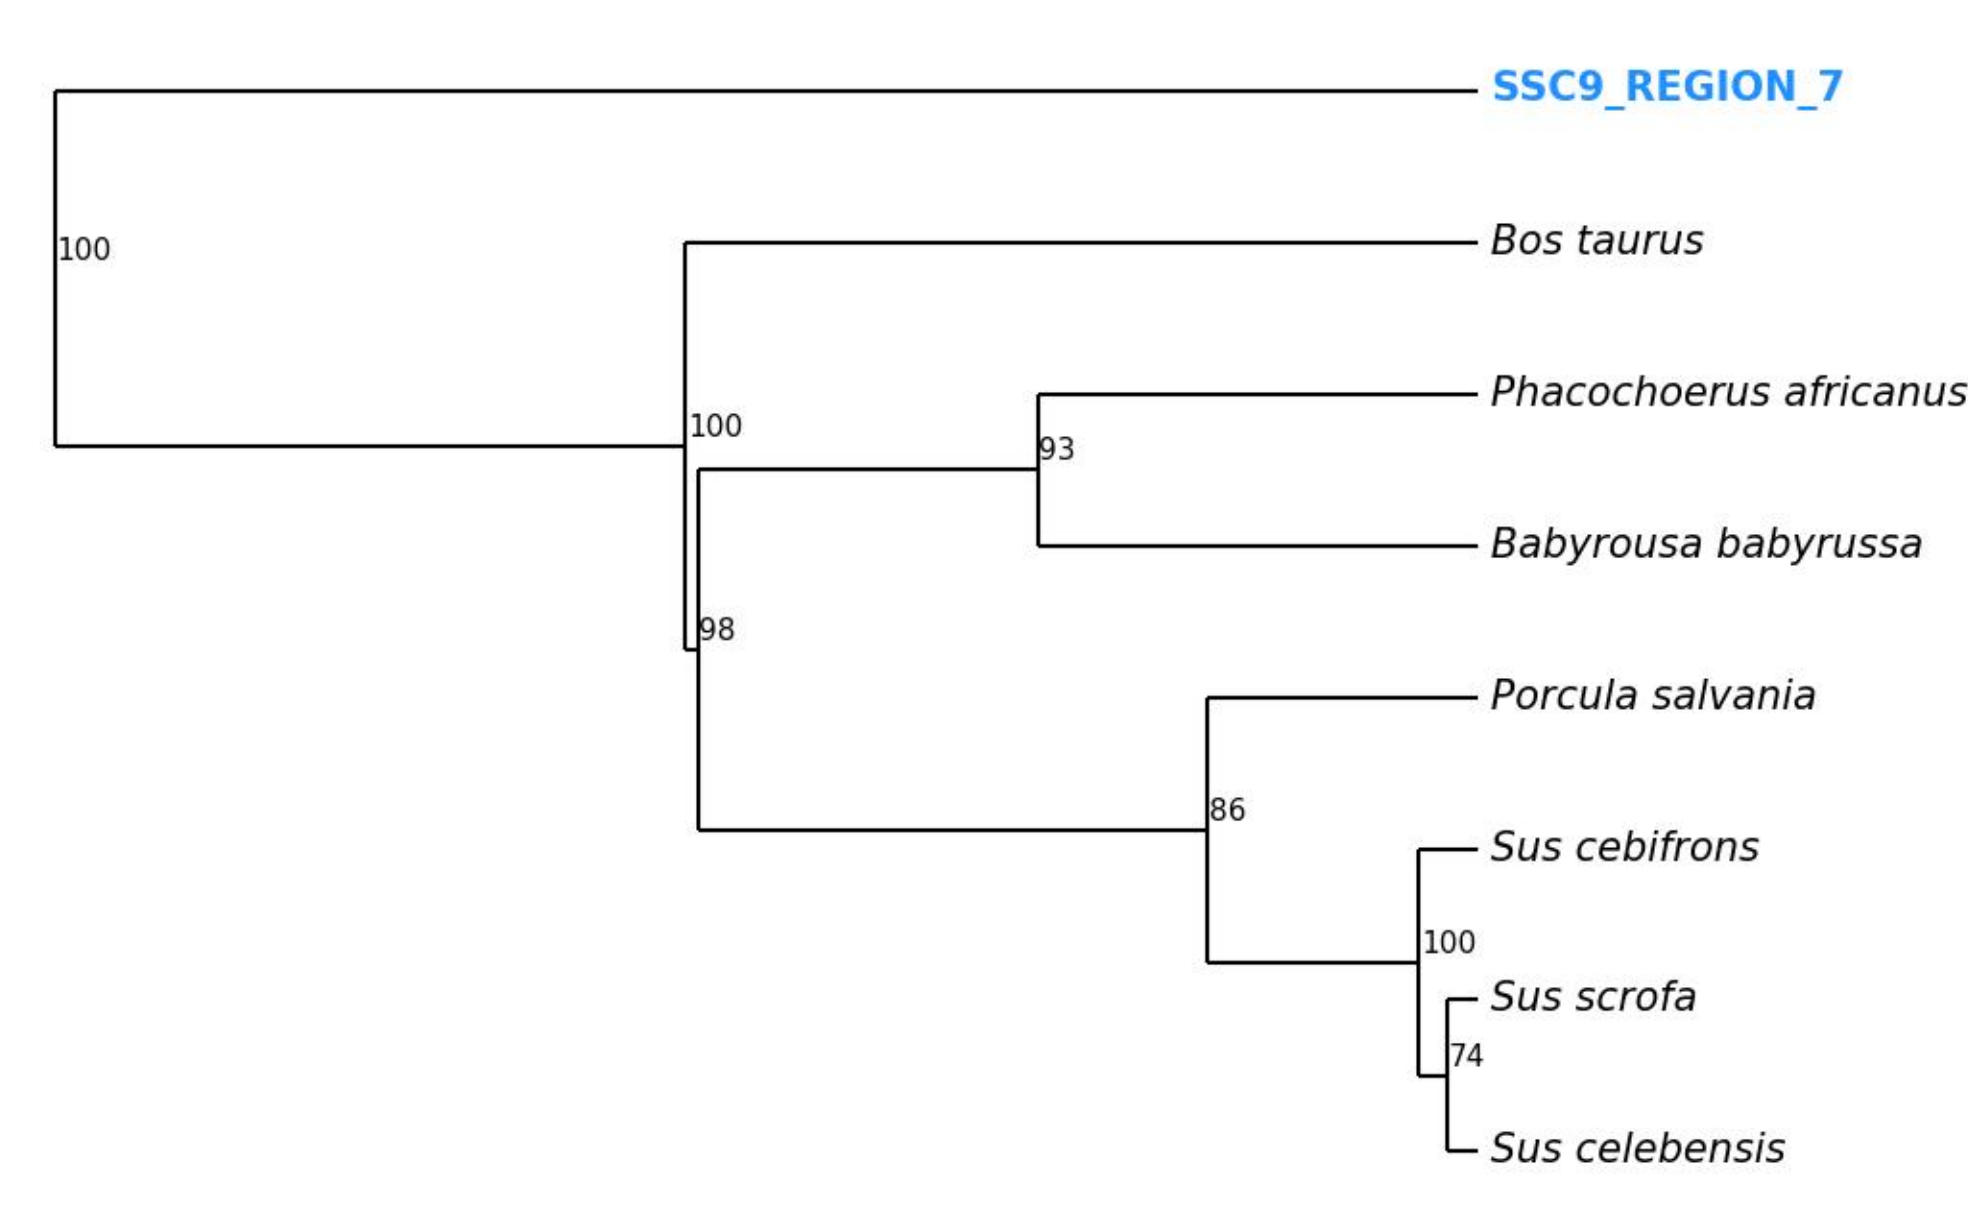

SSC9\_REGION\_10

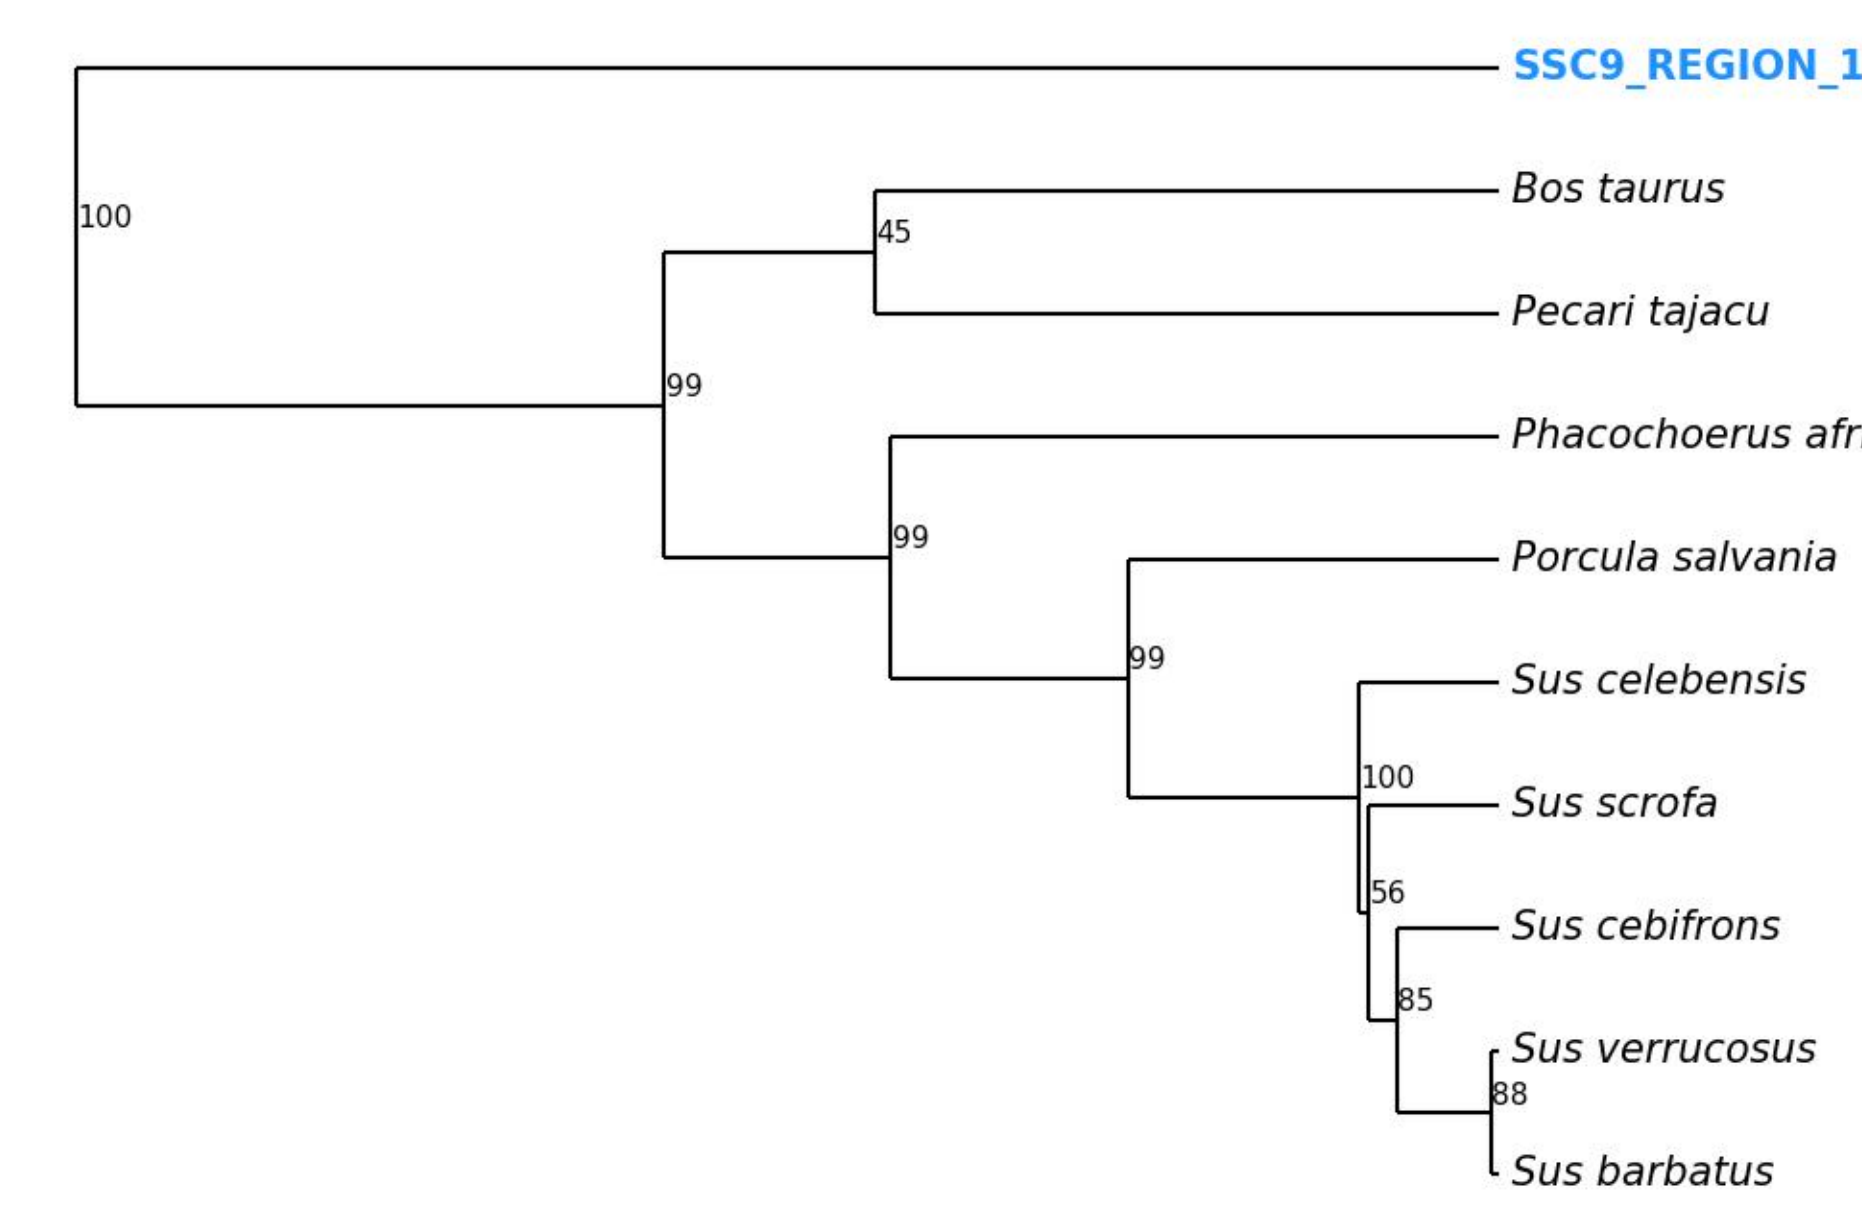

SSC9\_REGION\_11

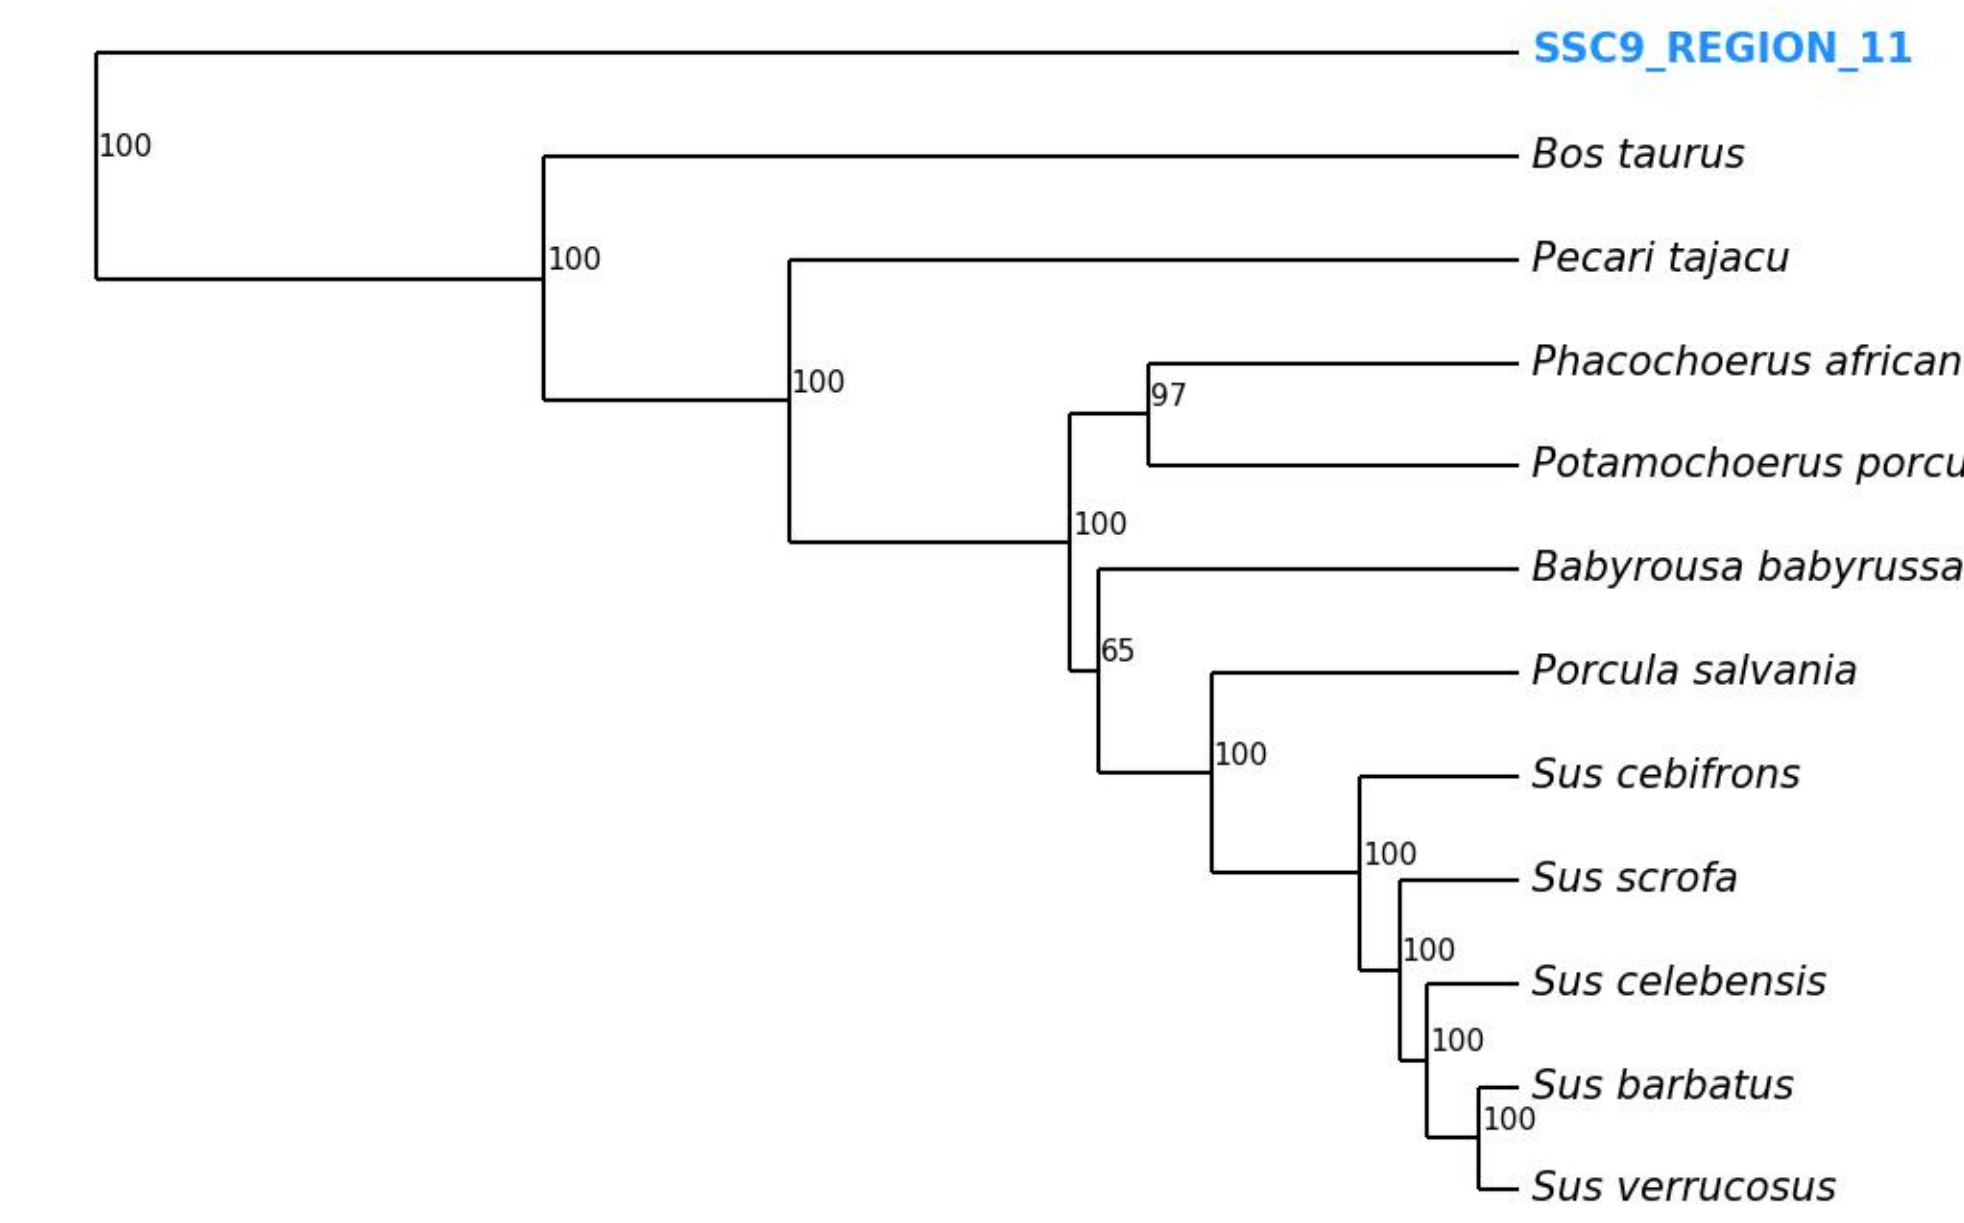

SSC9\_REGION\_12

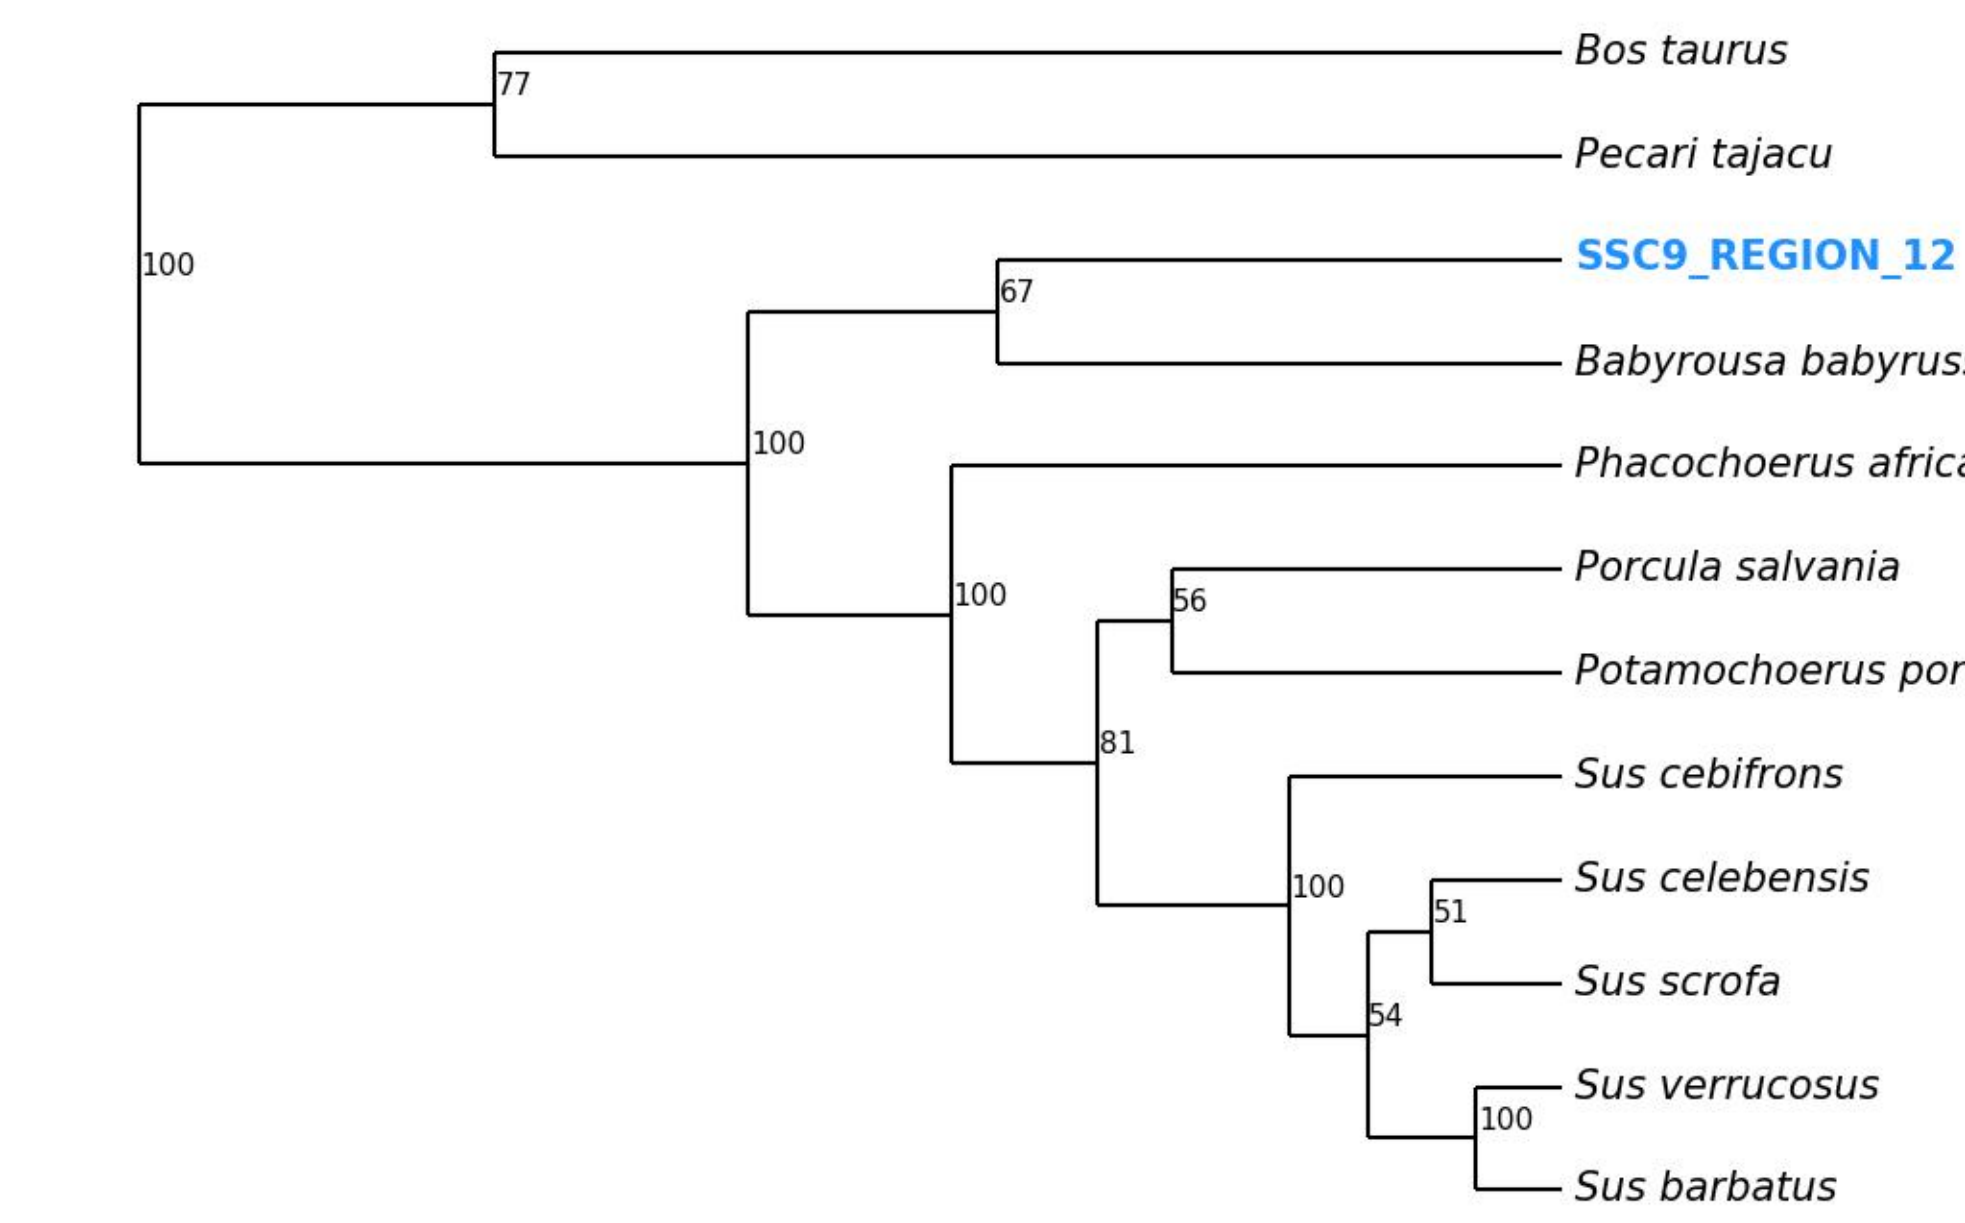

SSC9\_REGION\_13

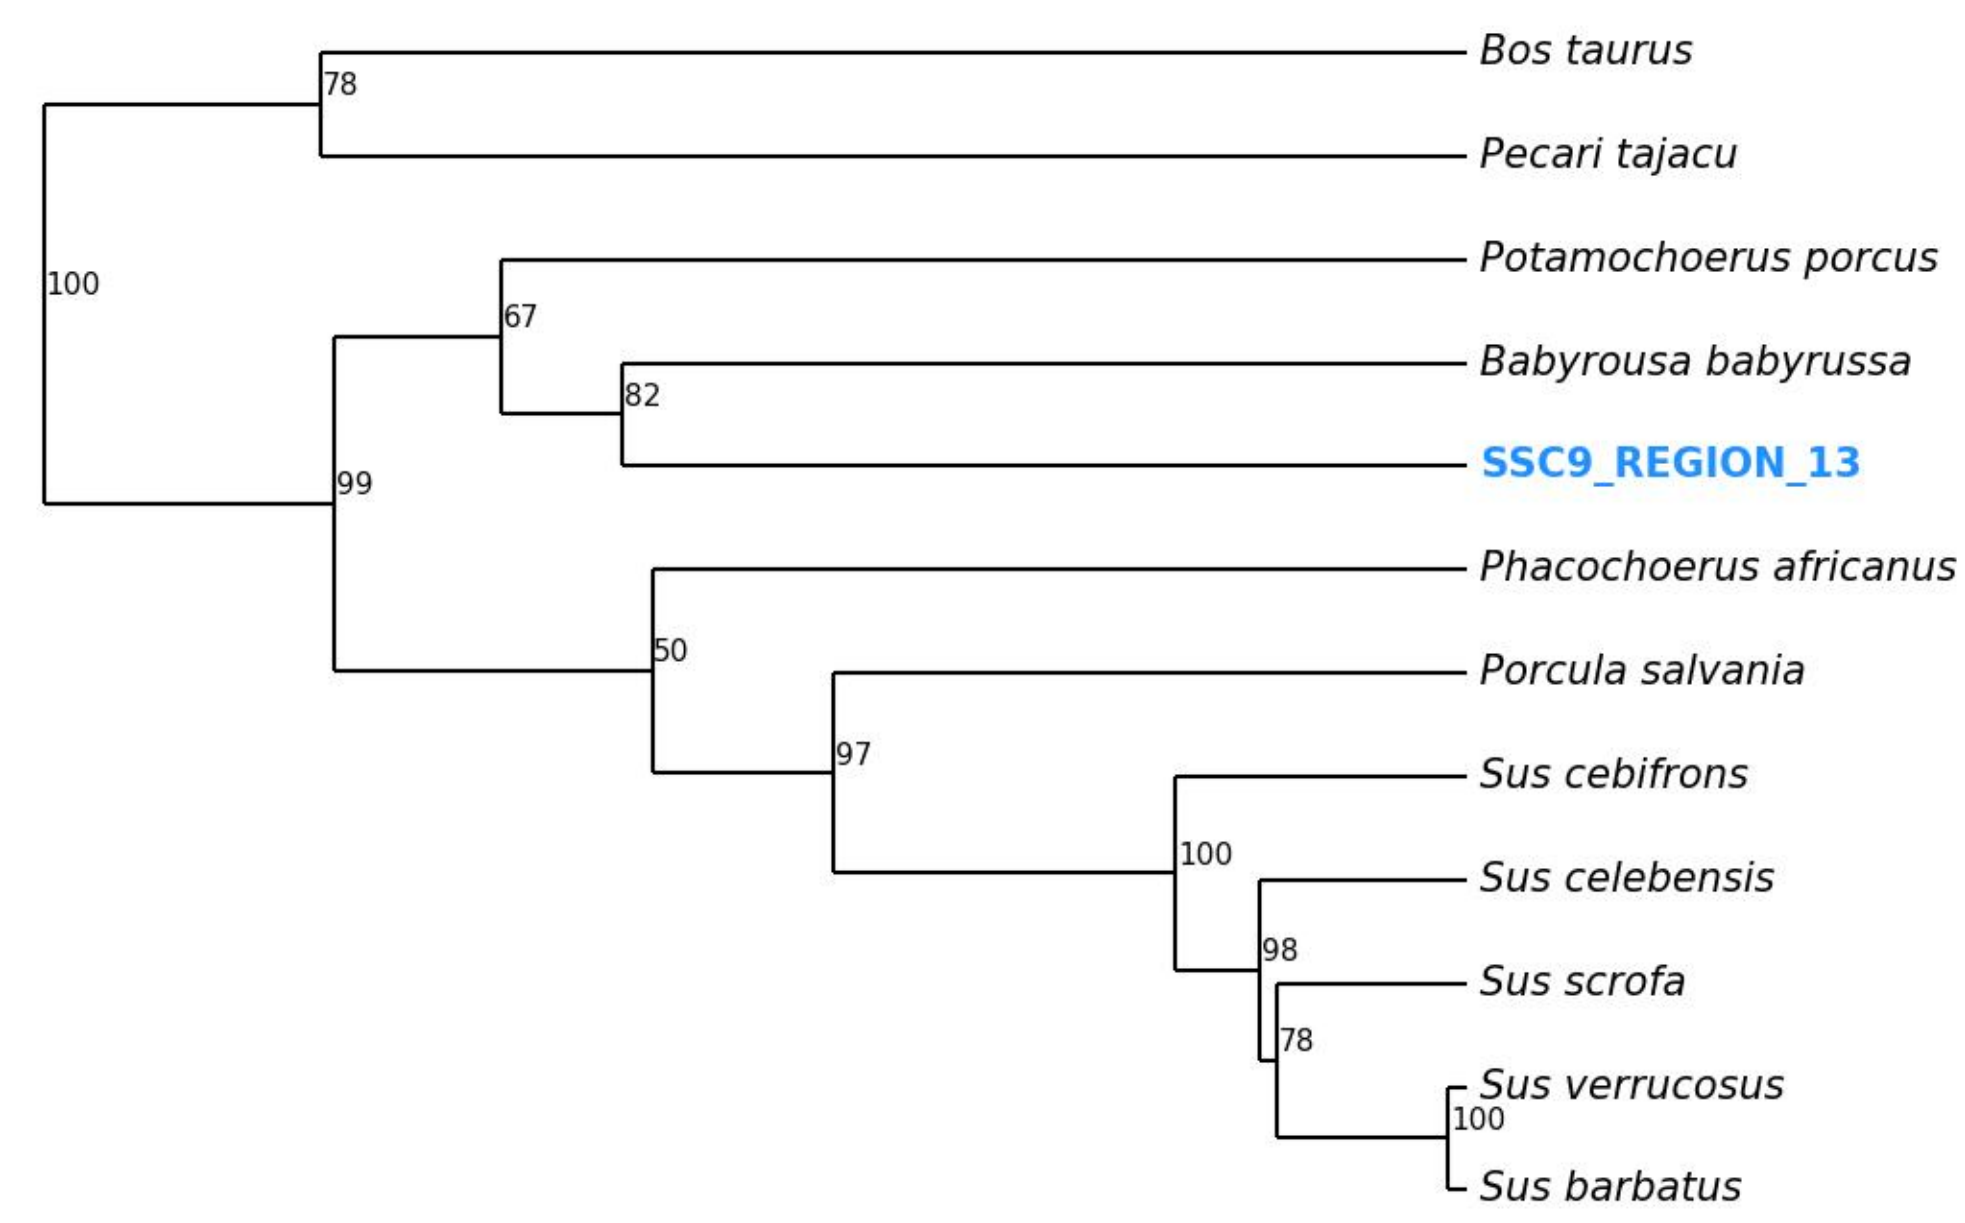

SSC9\_REGION\_15

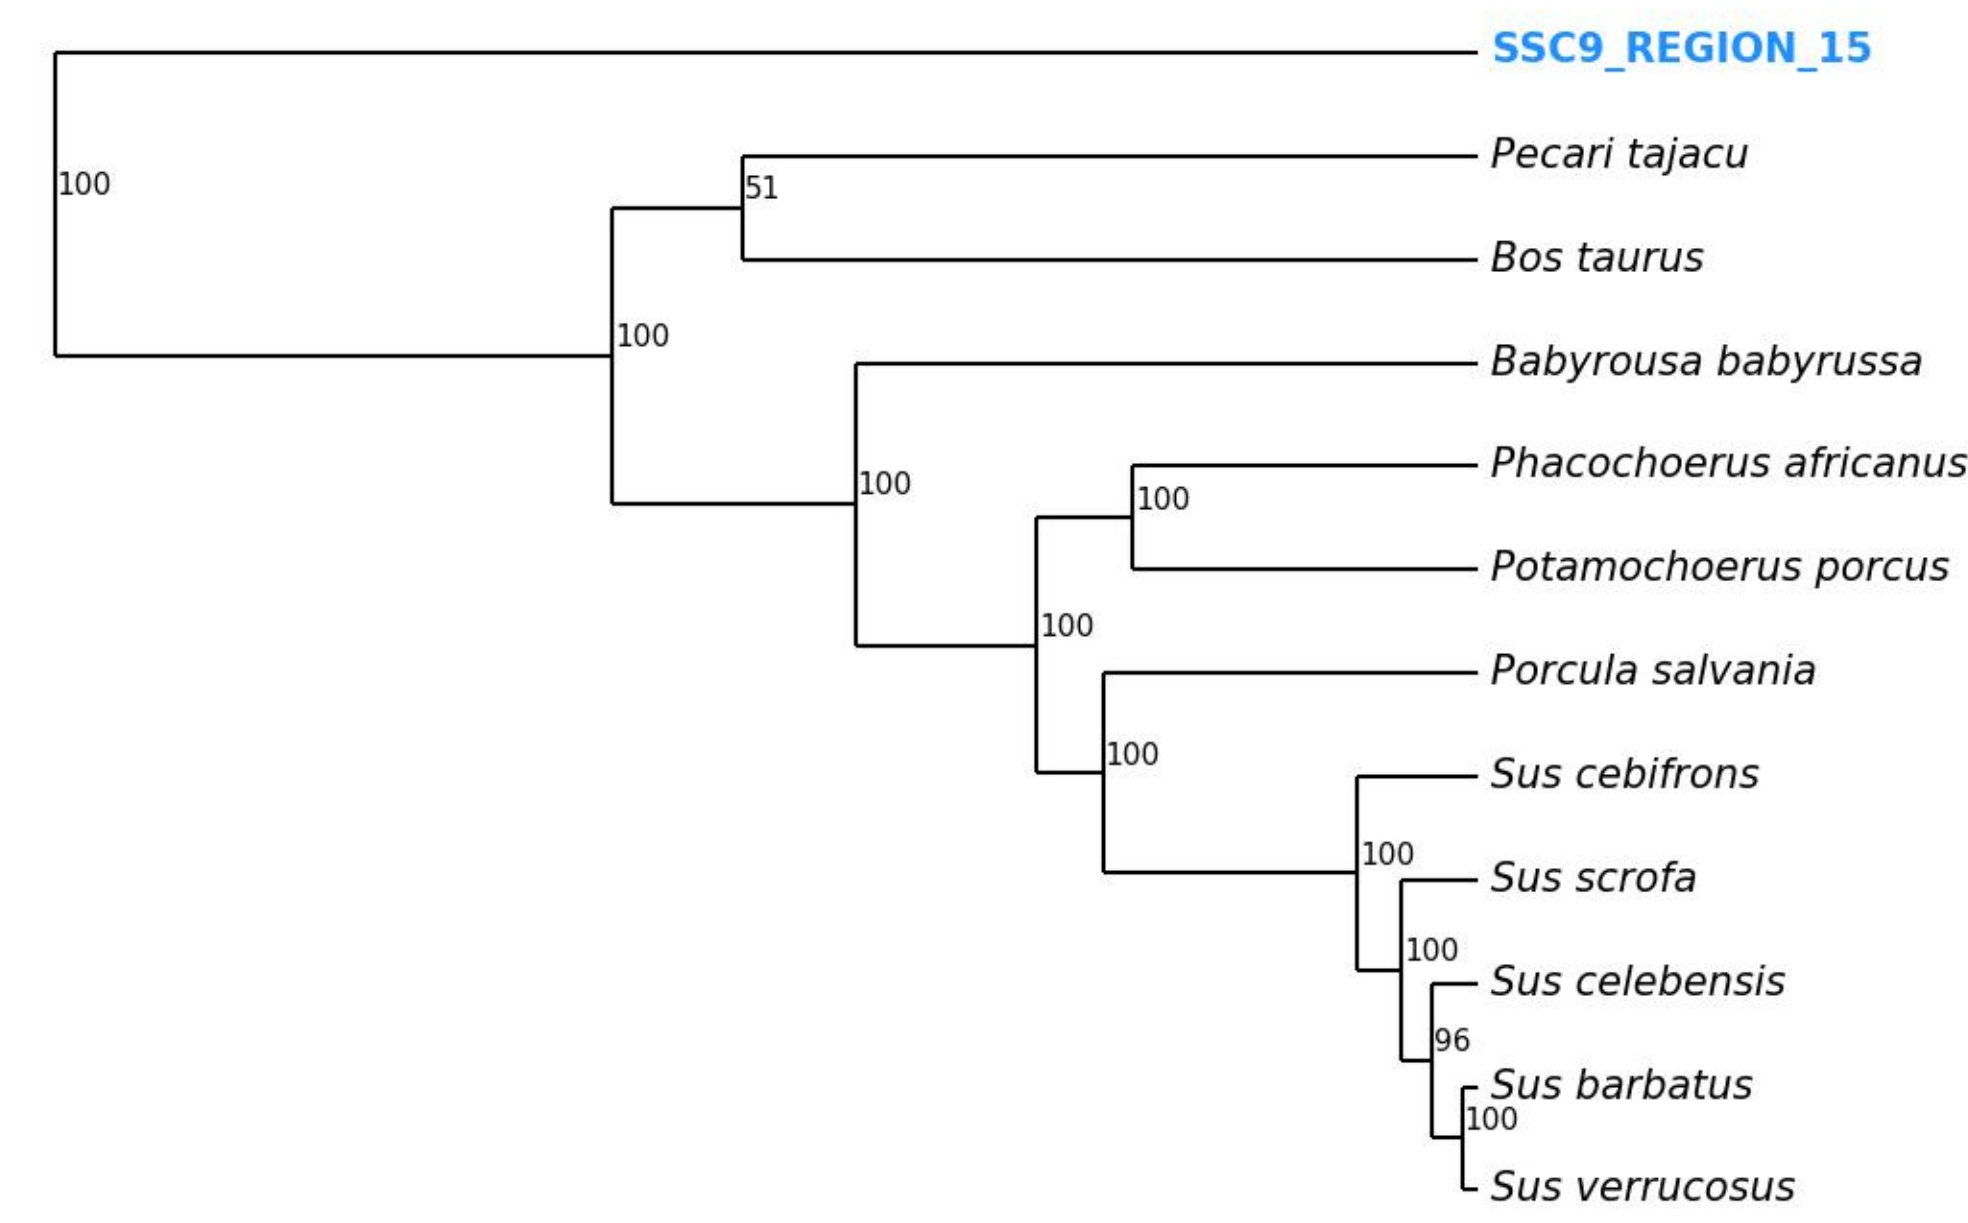

SSC9\_REGION\_18

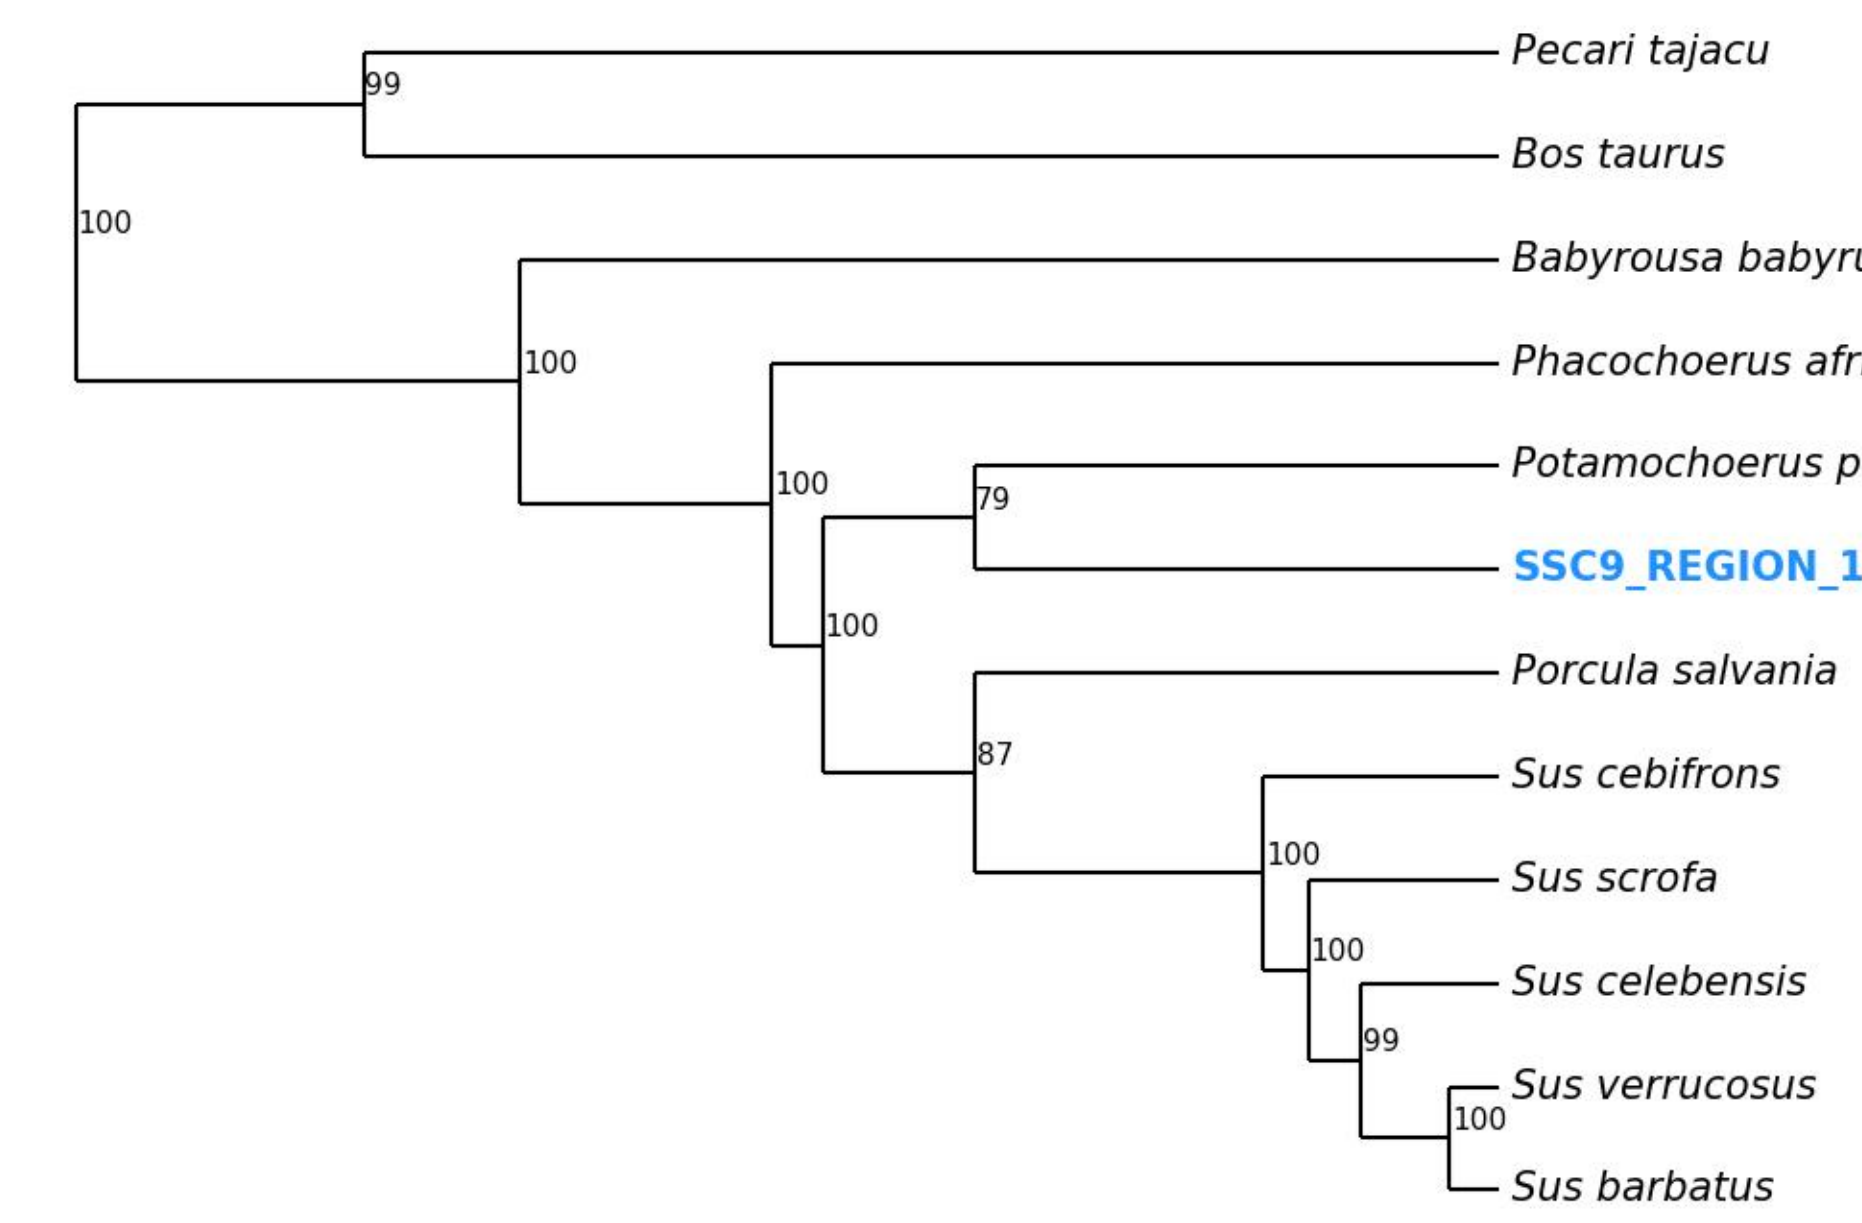

SSC9\_REGION\_21

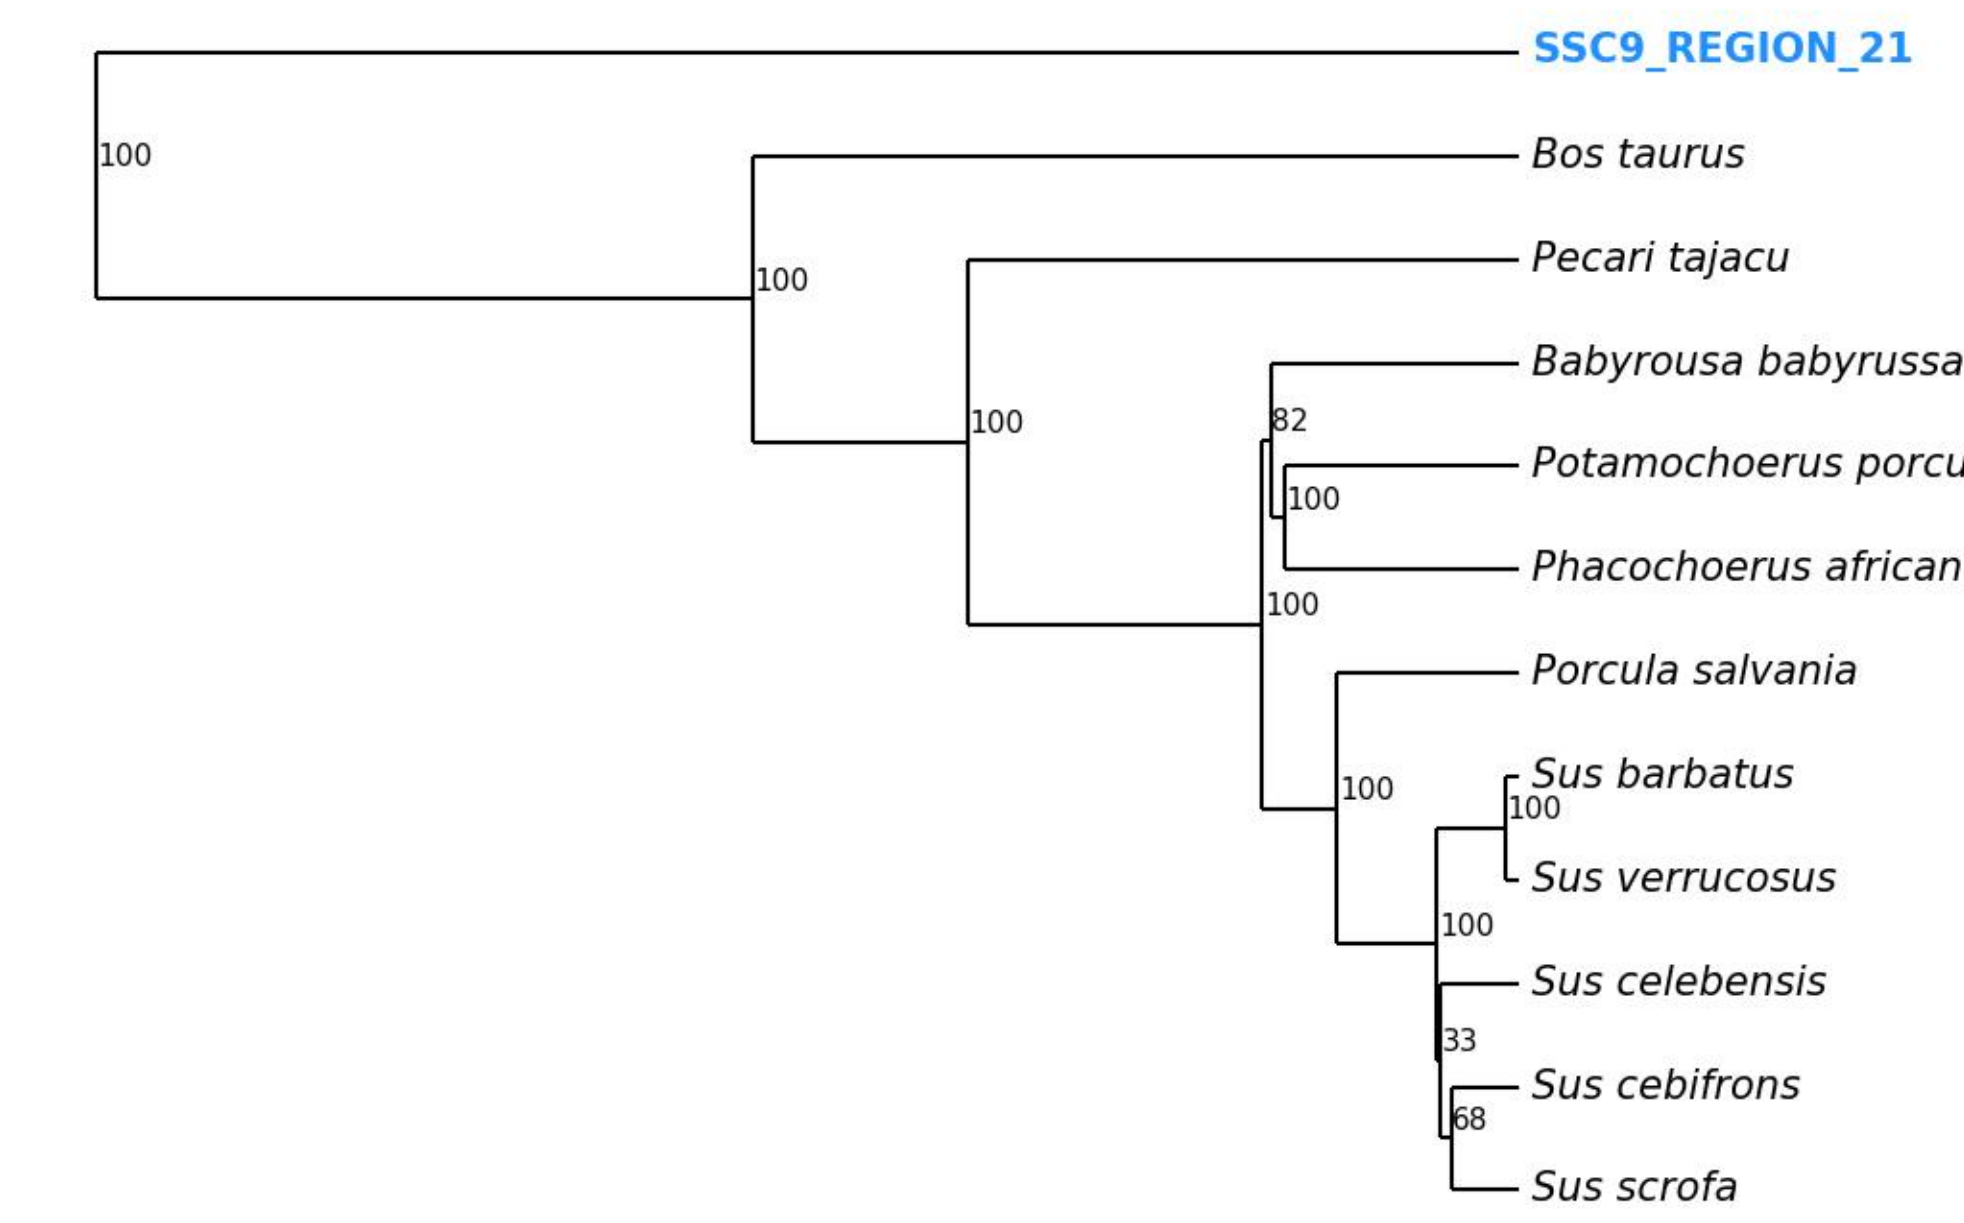

SSC9\_REGION\_22

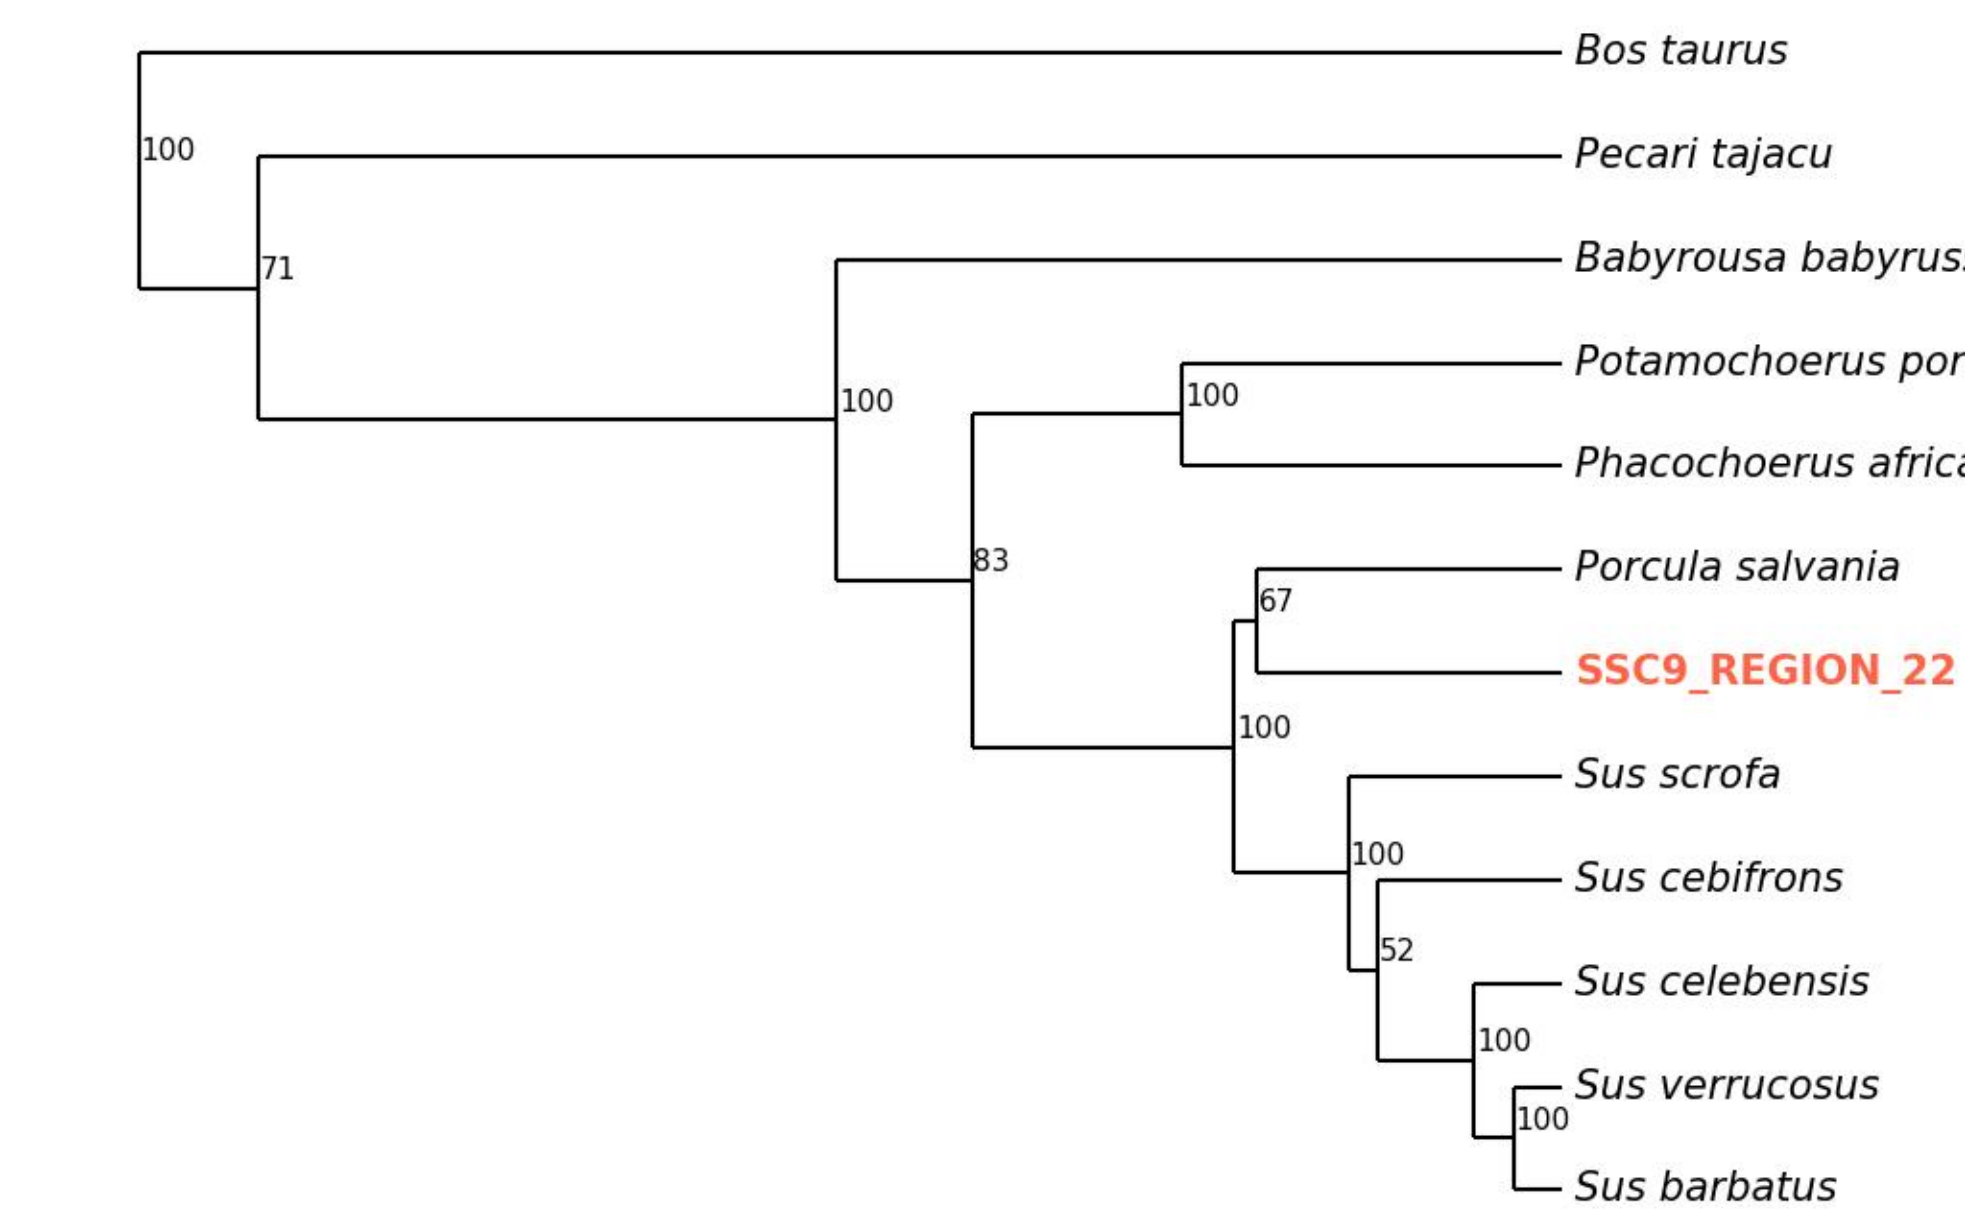







SSC14\_REGION\_15

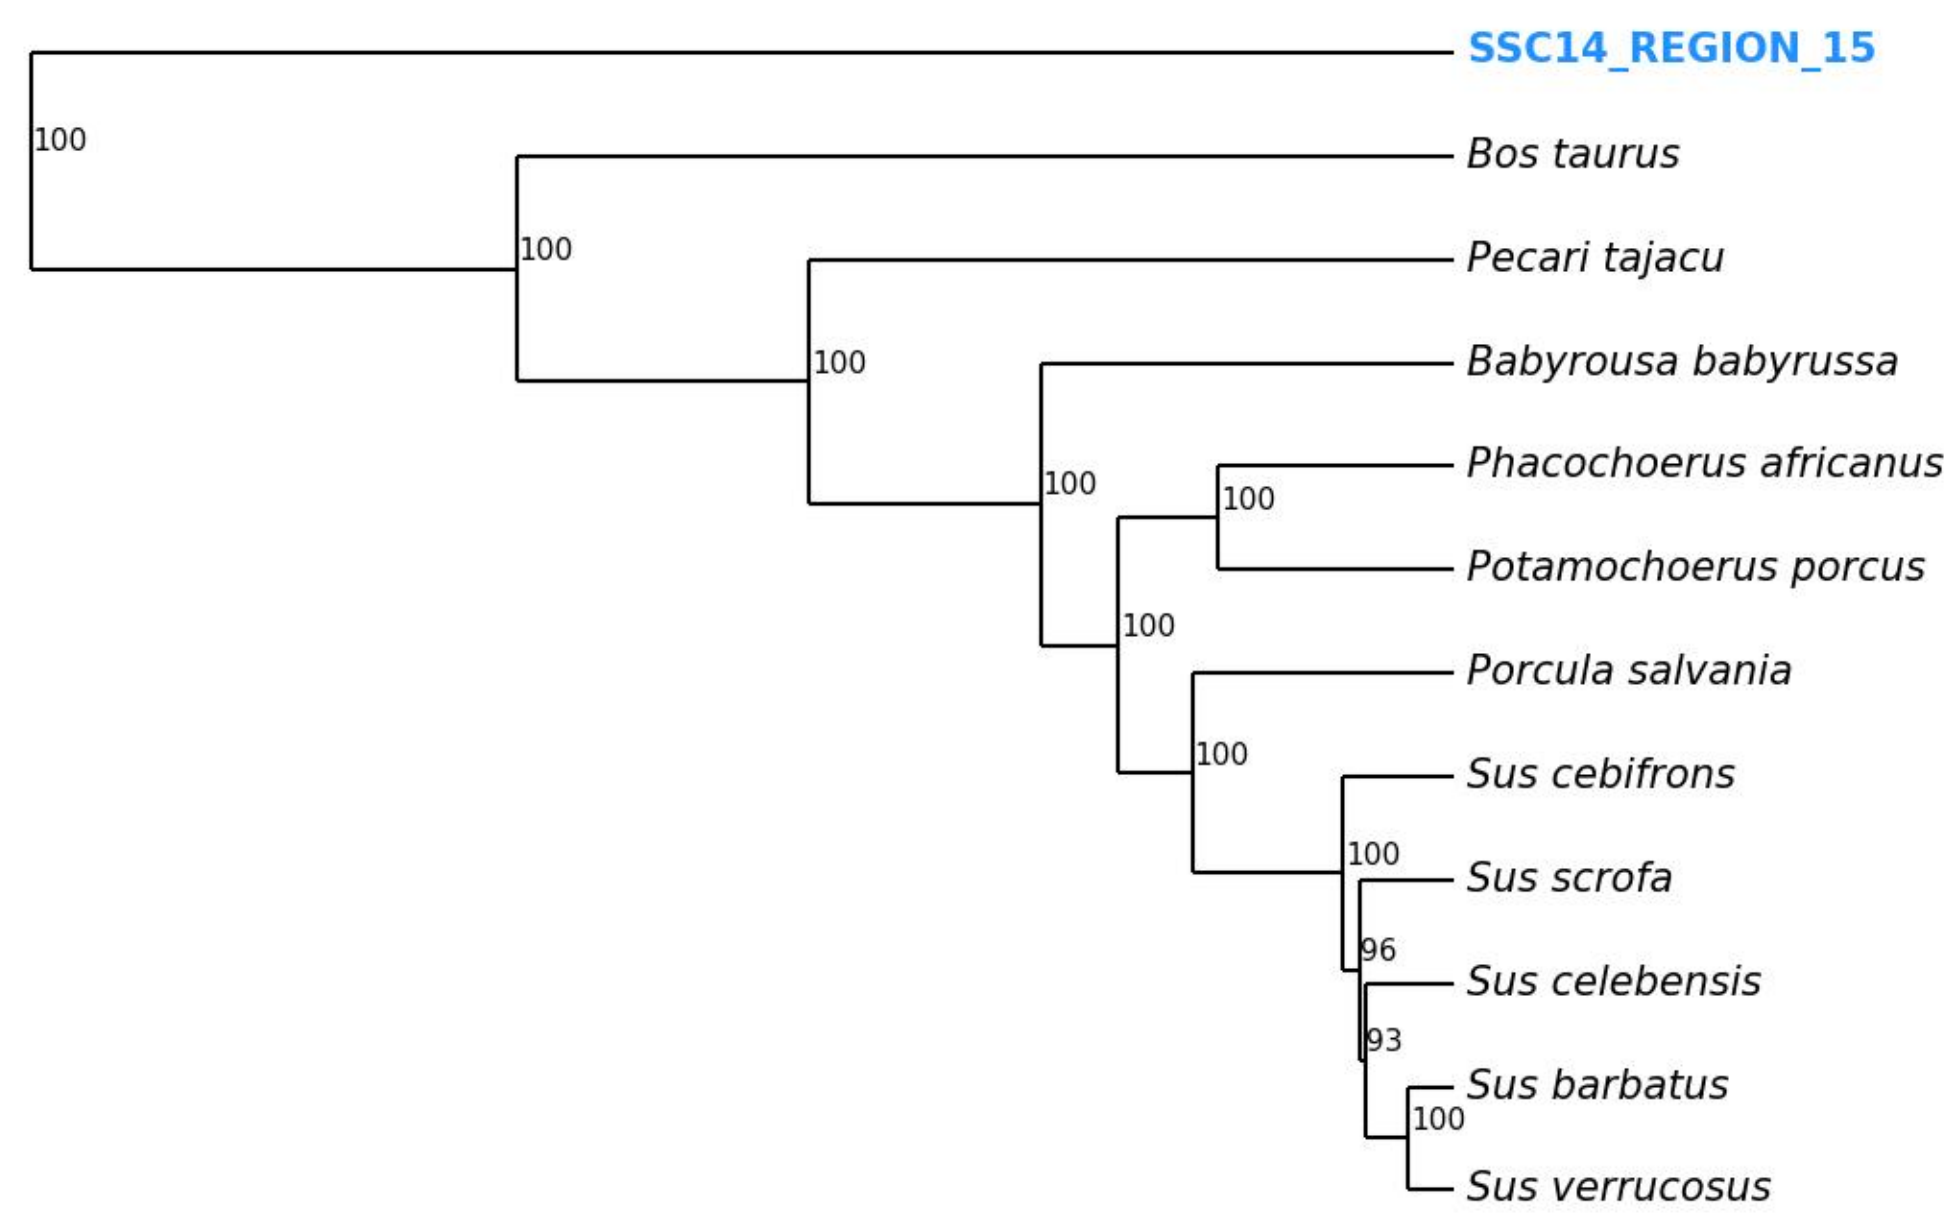

SSC14\_REGION\_23

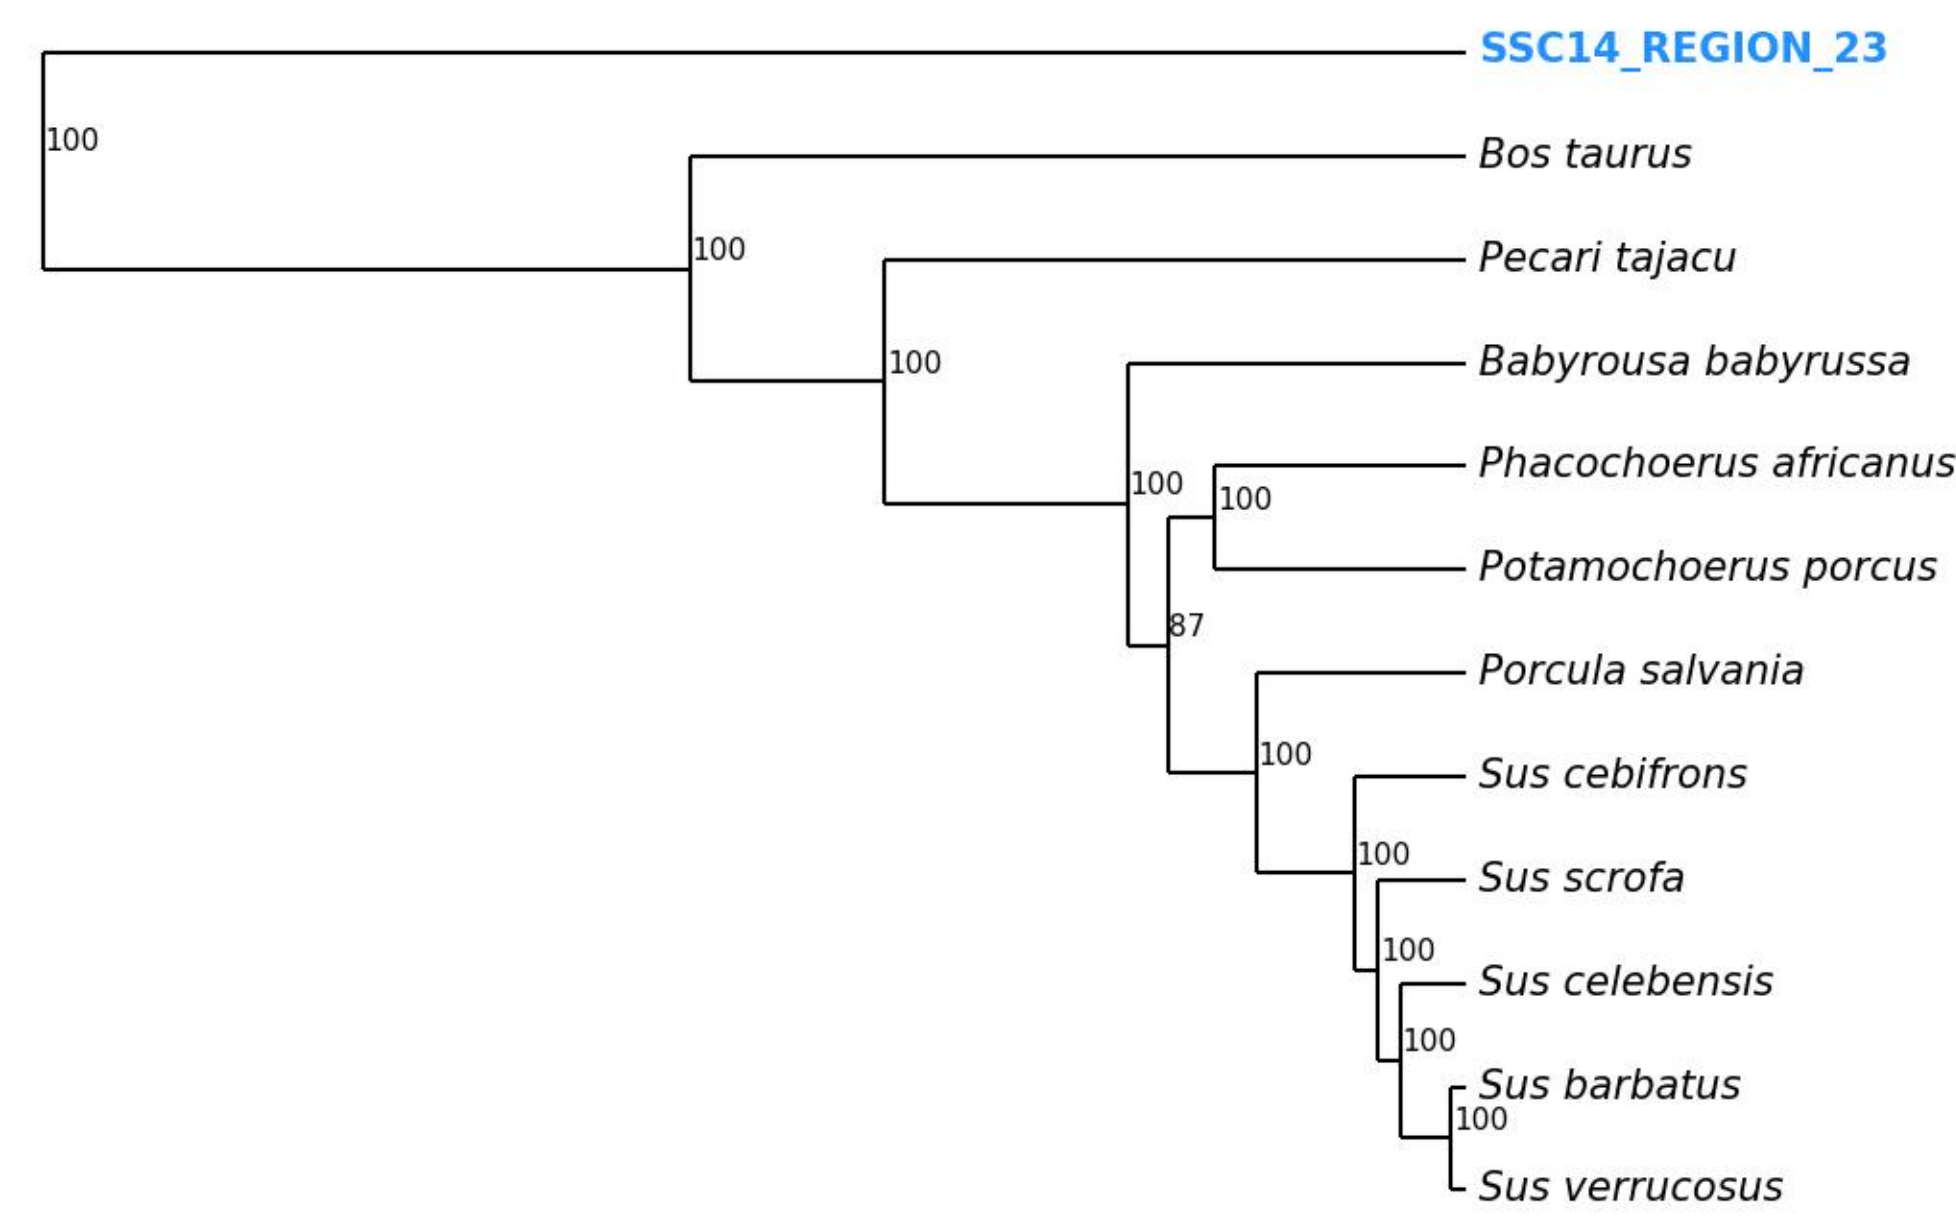

SSC14\_REGION\_24

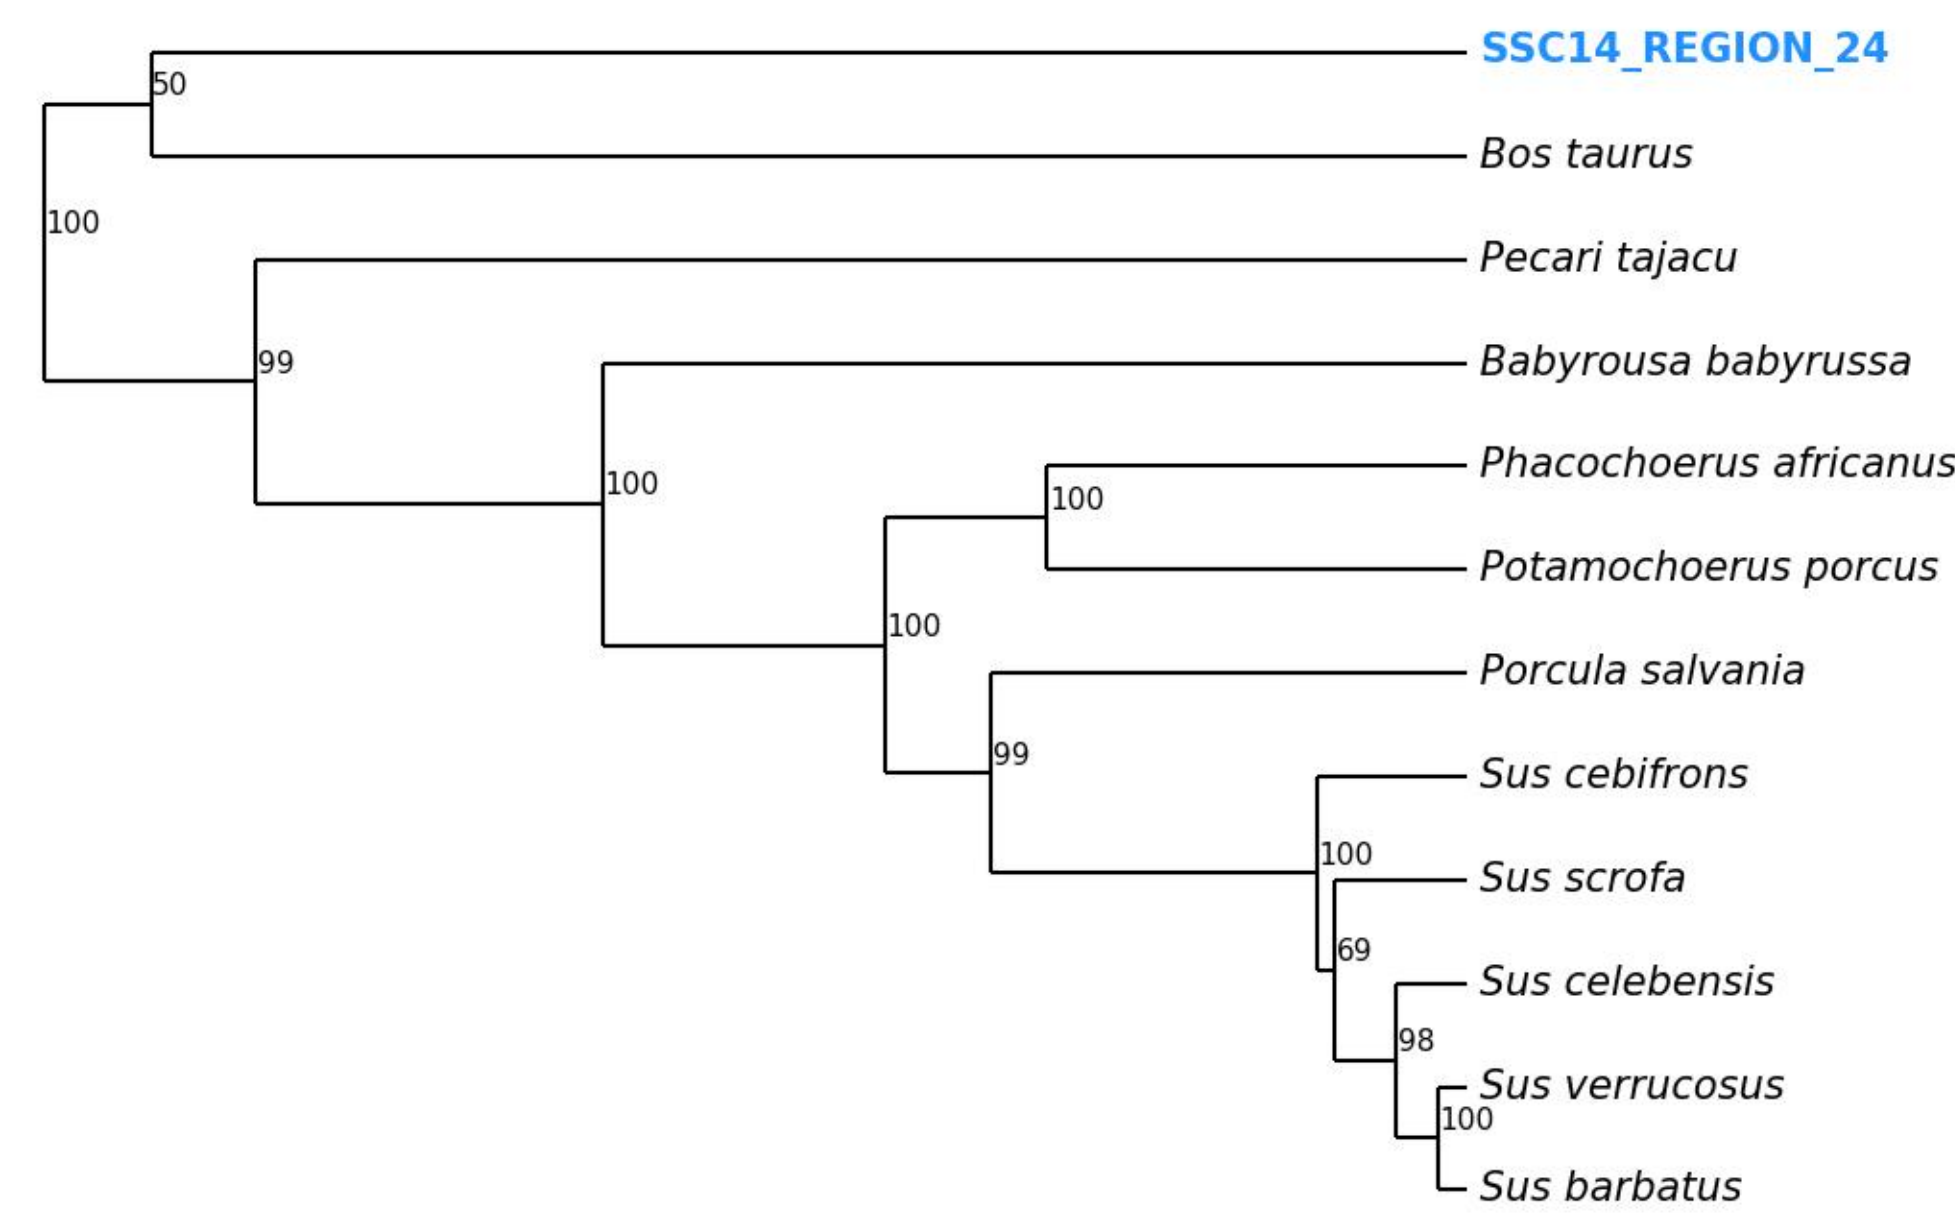

SSC14\_REGION\_27

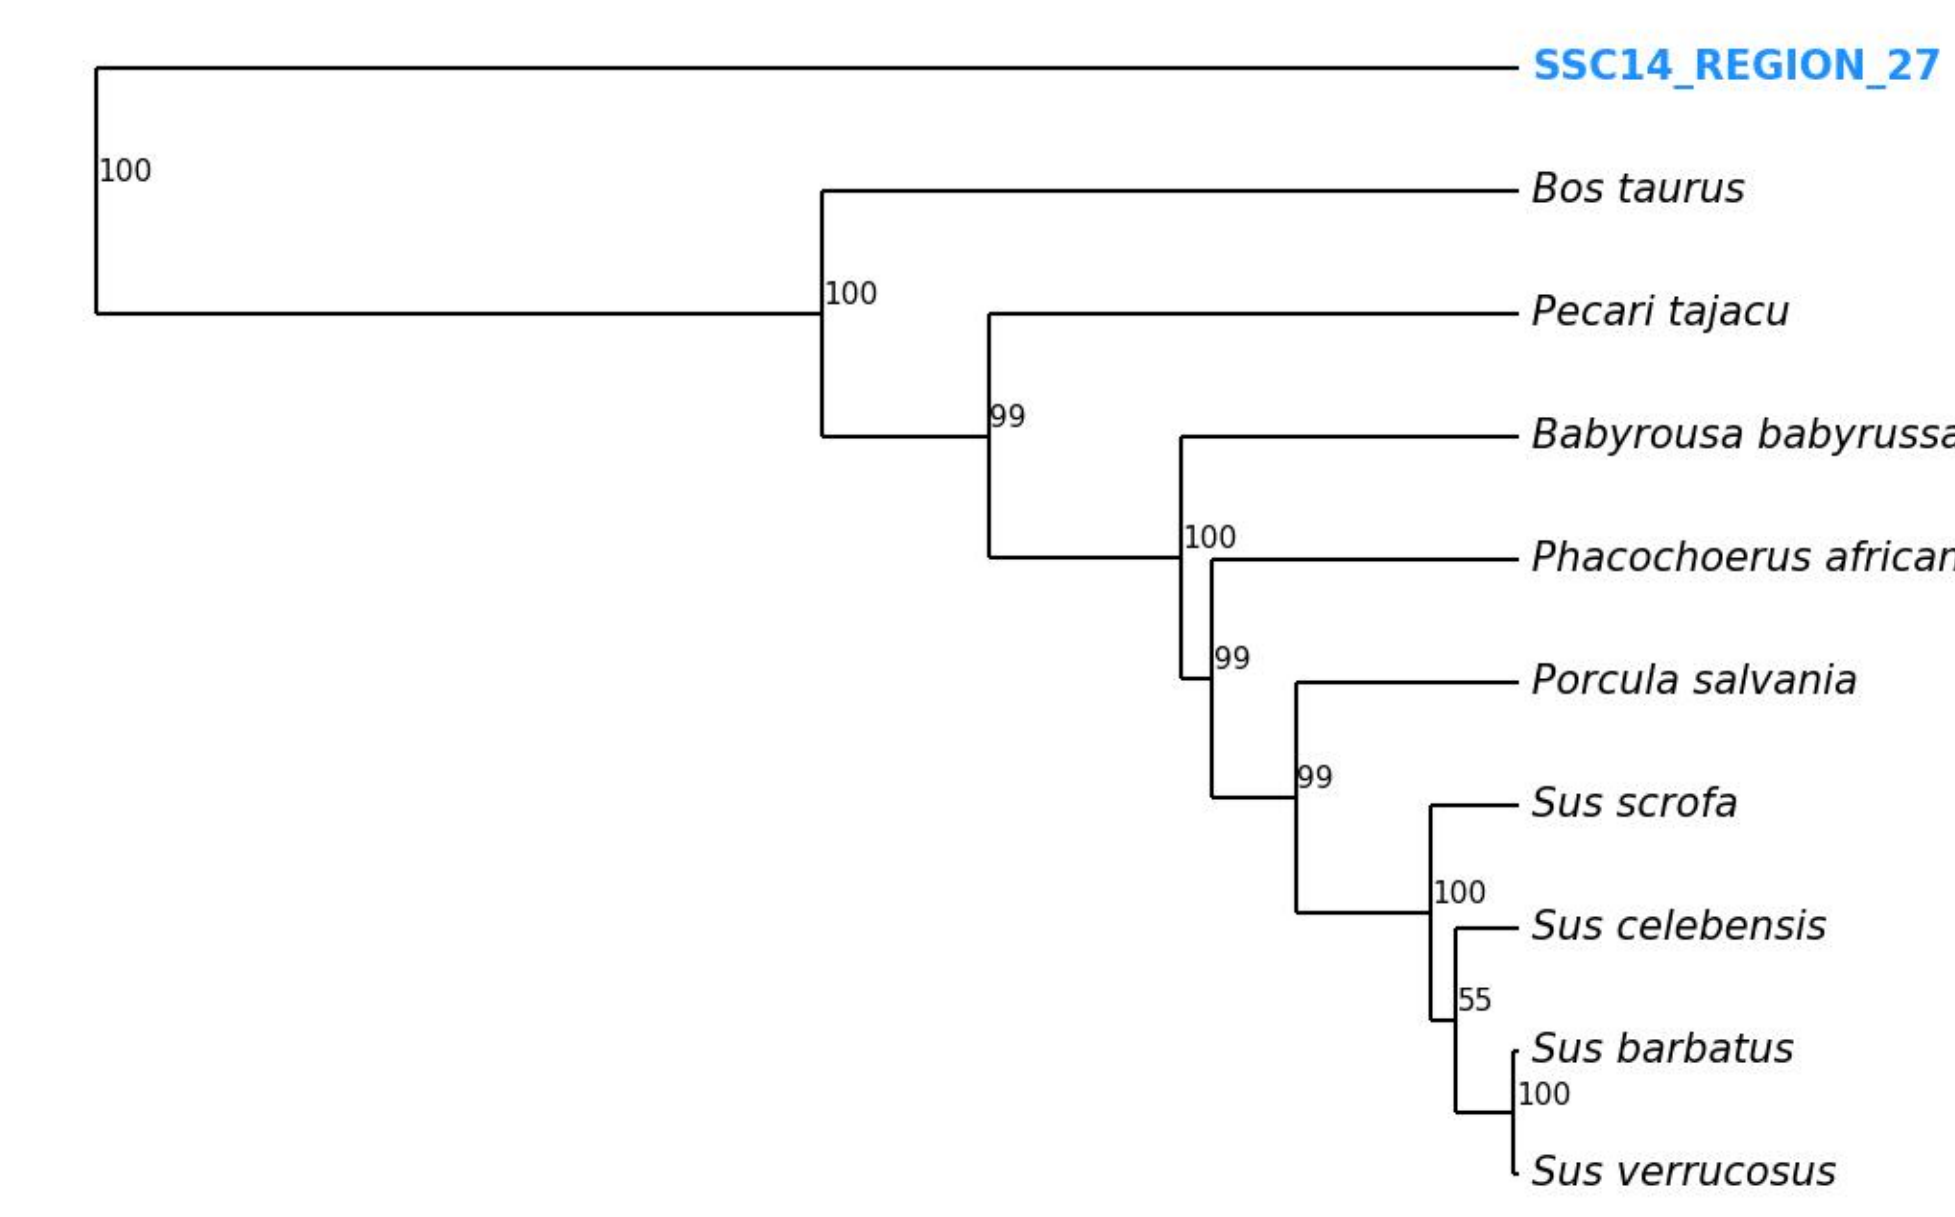

SSC15\_REGION\_1

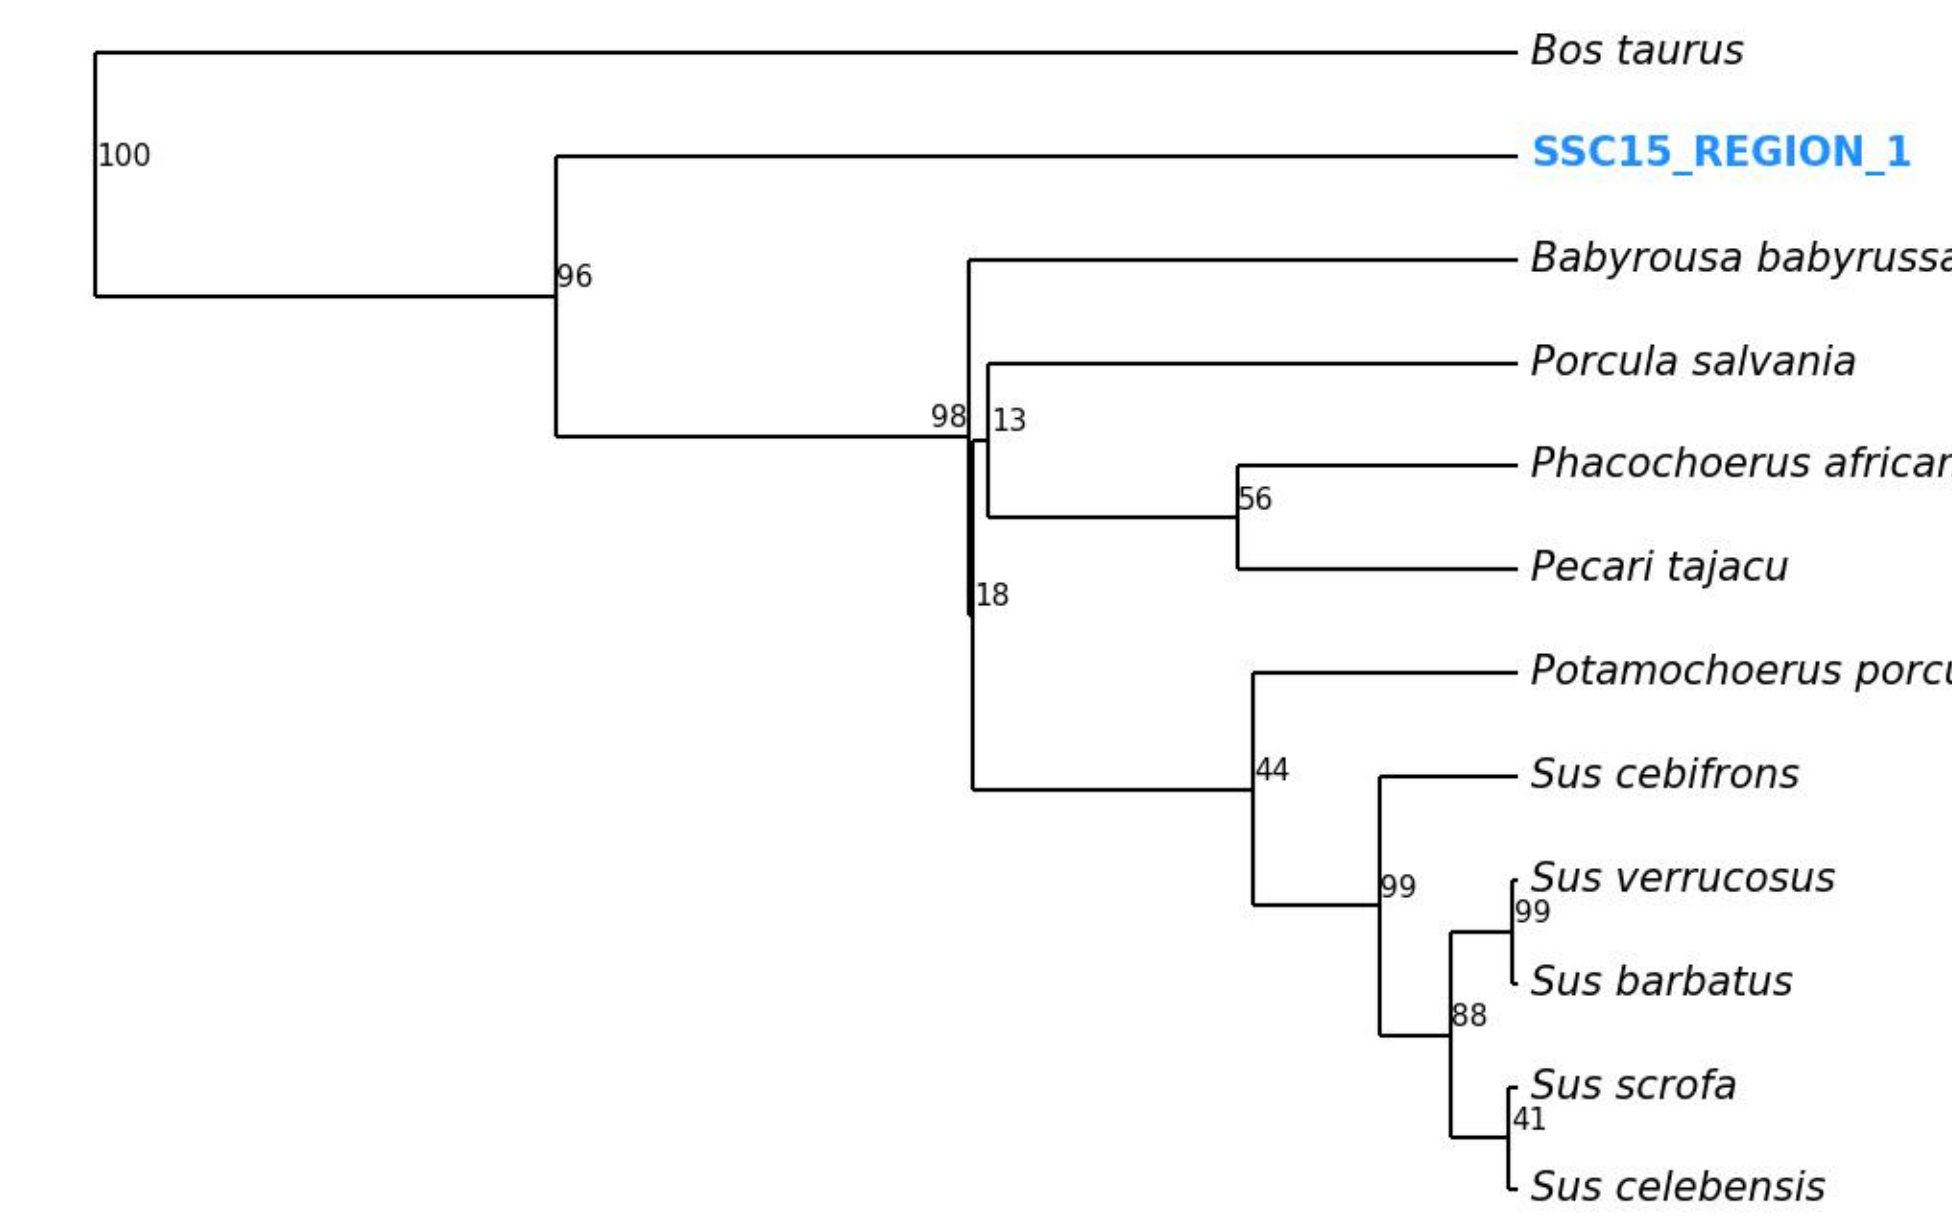

SSC15\_REGION\_5

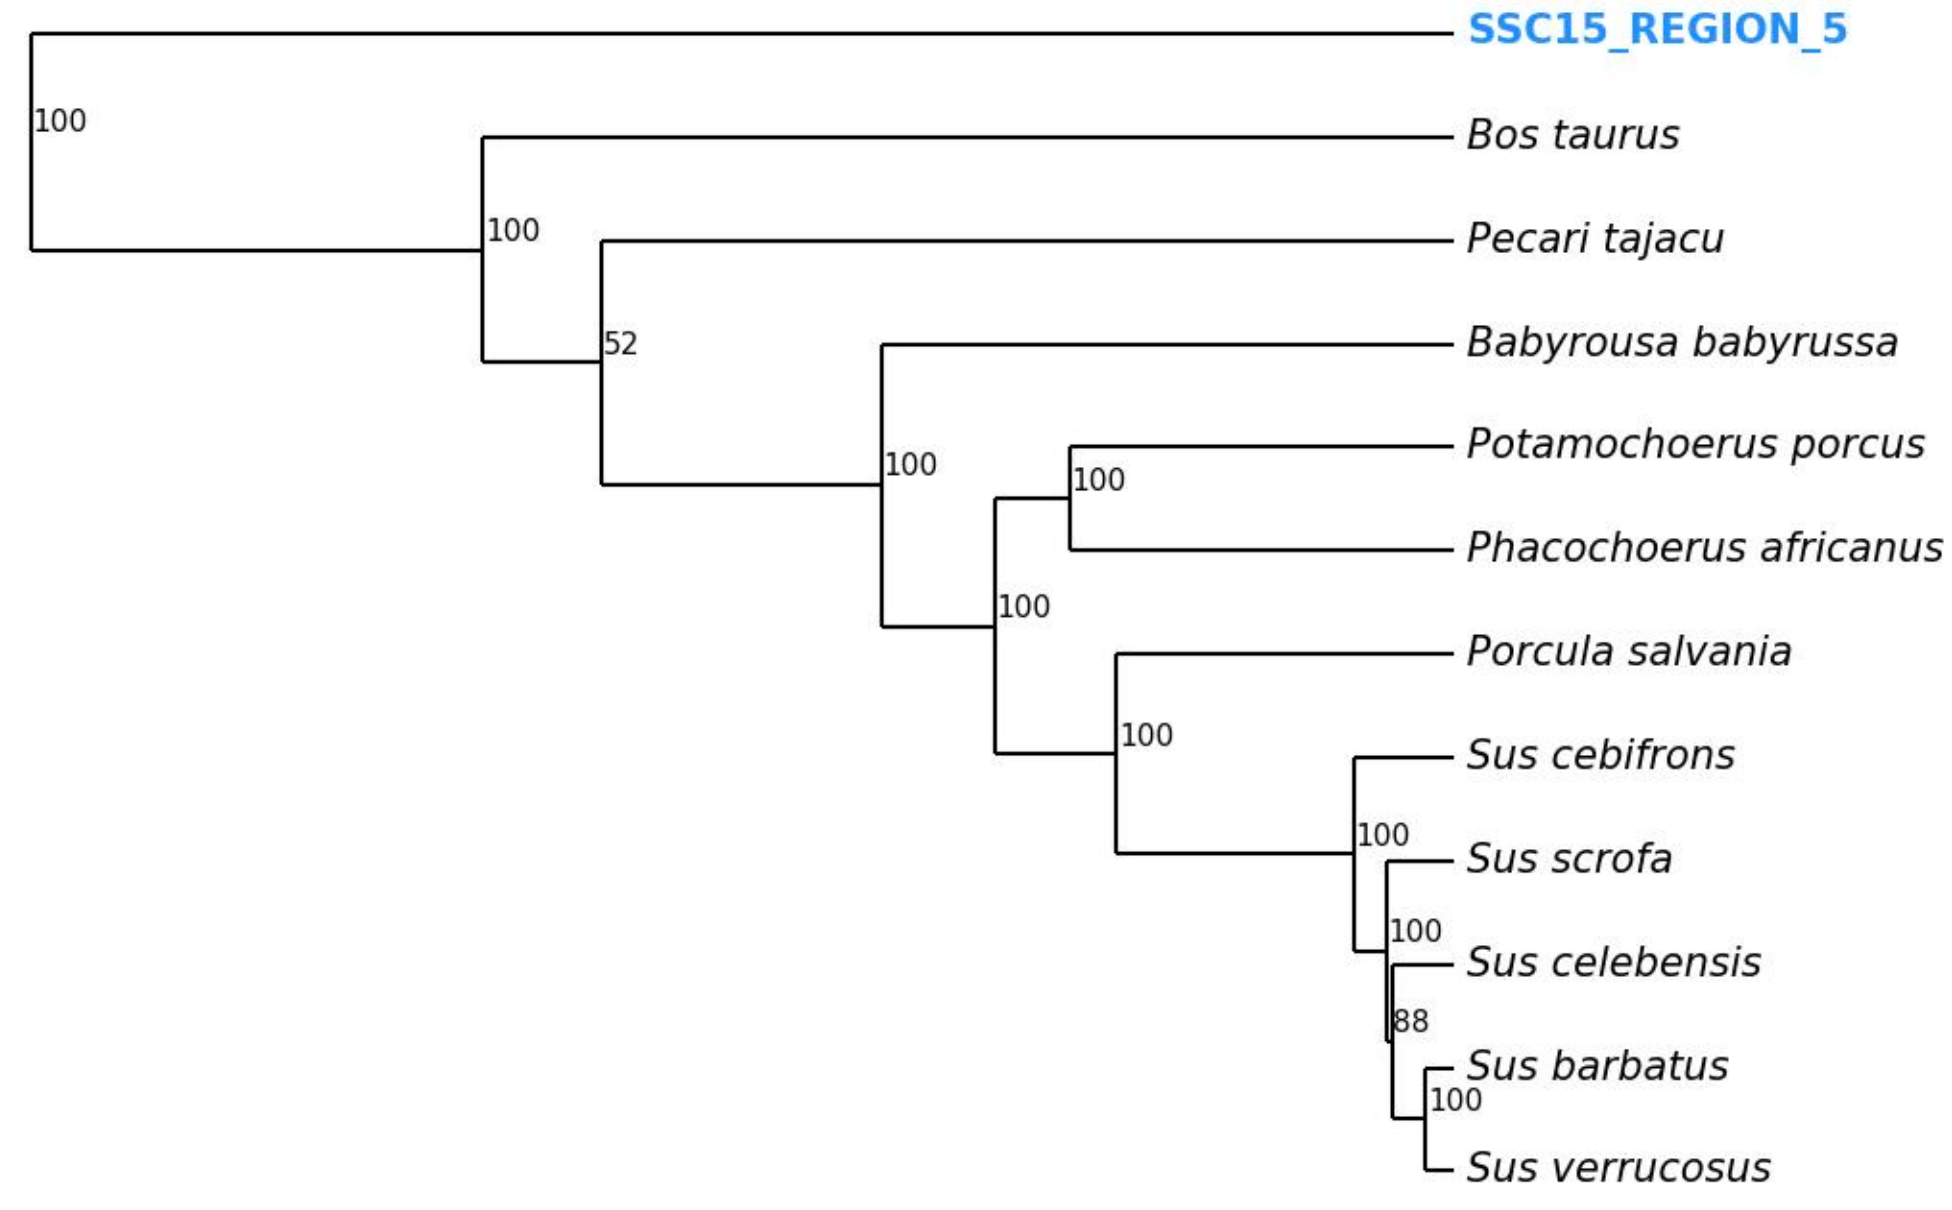

SSC15\_REGION\_7

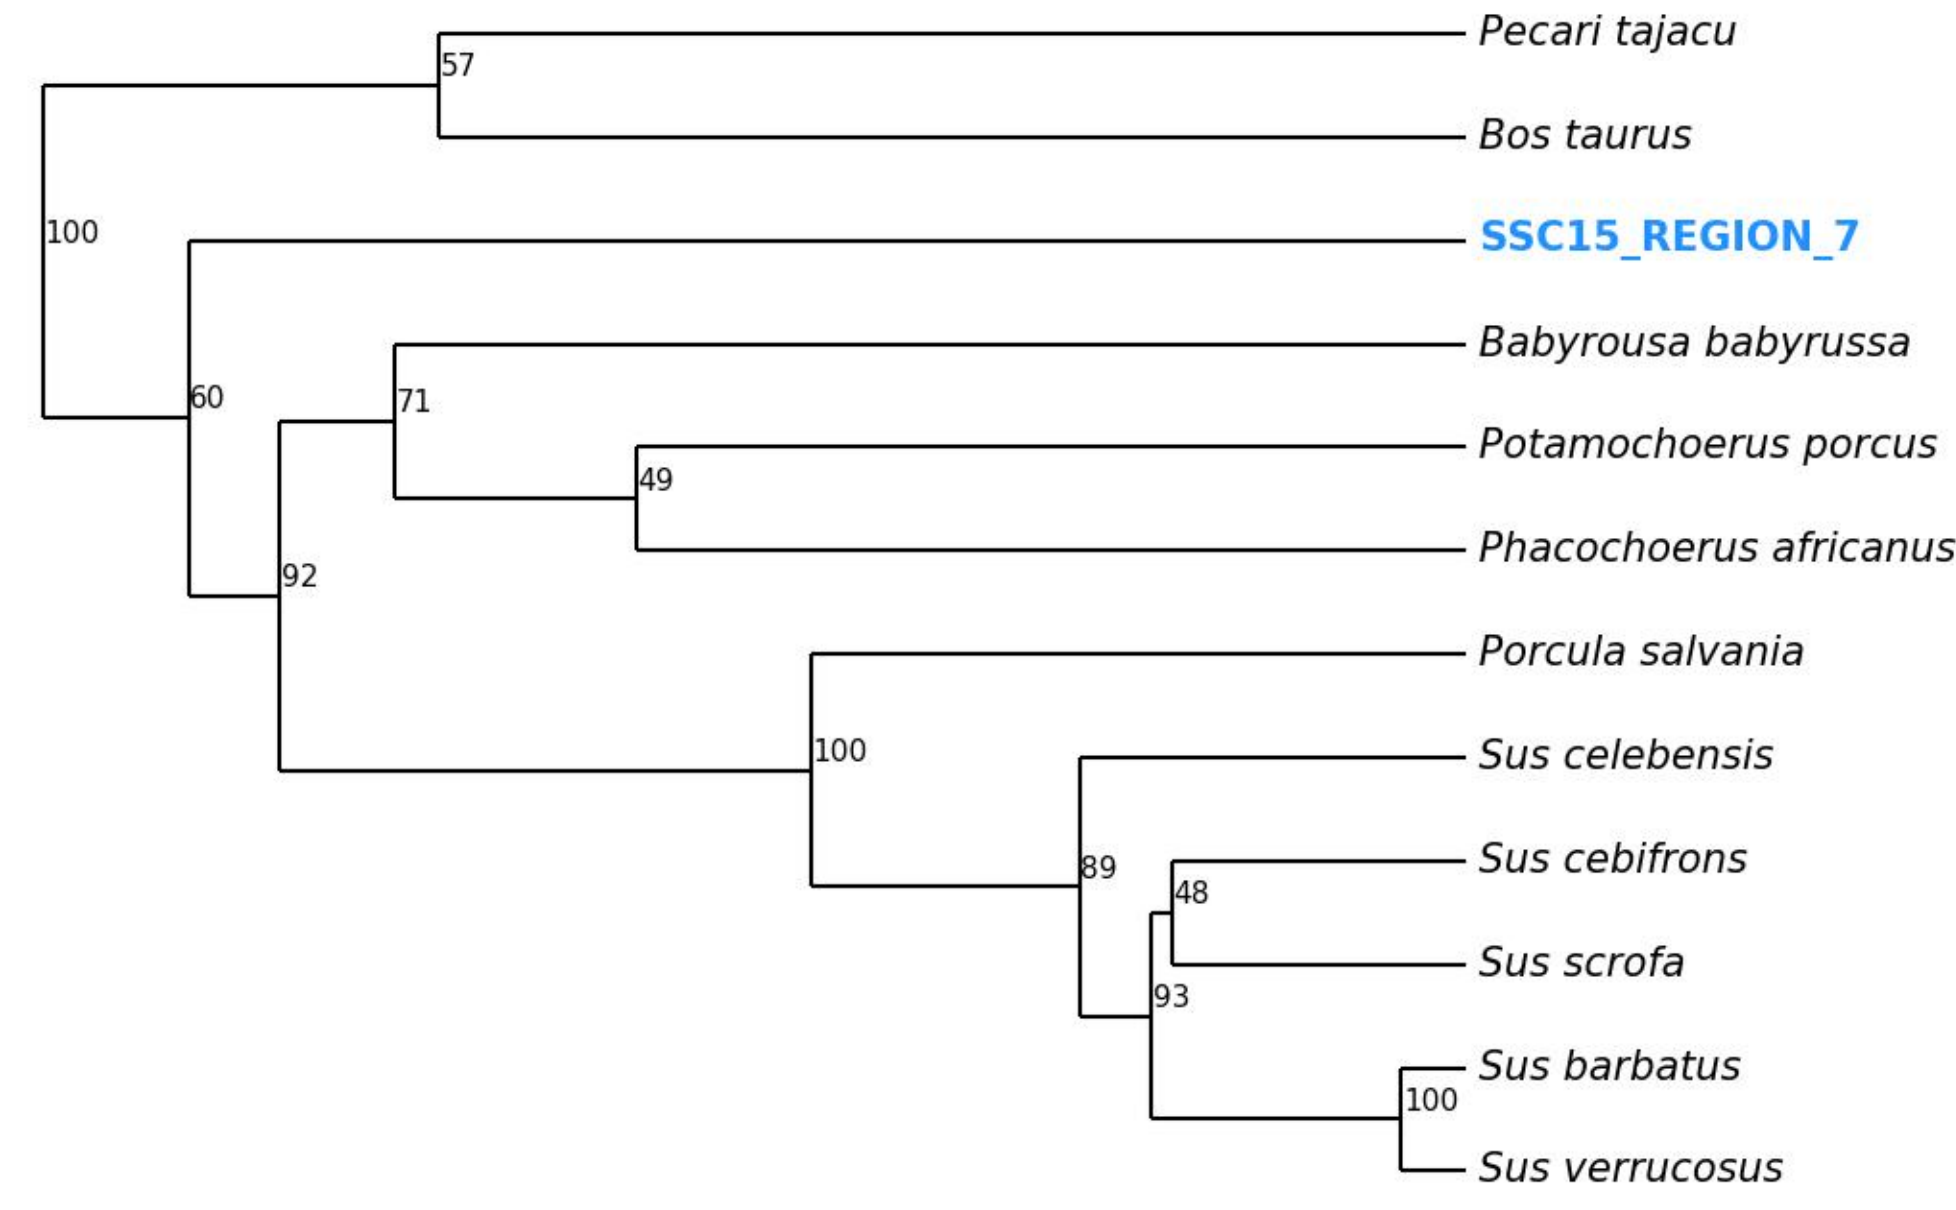

SSC15\_REGION\_9

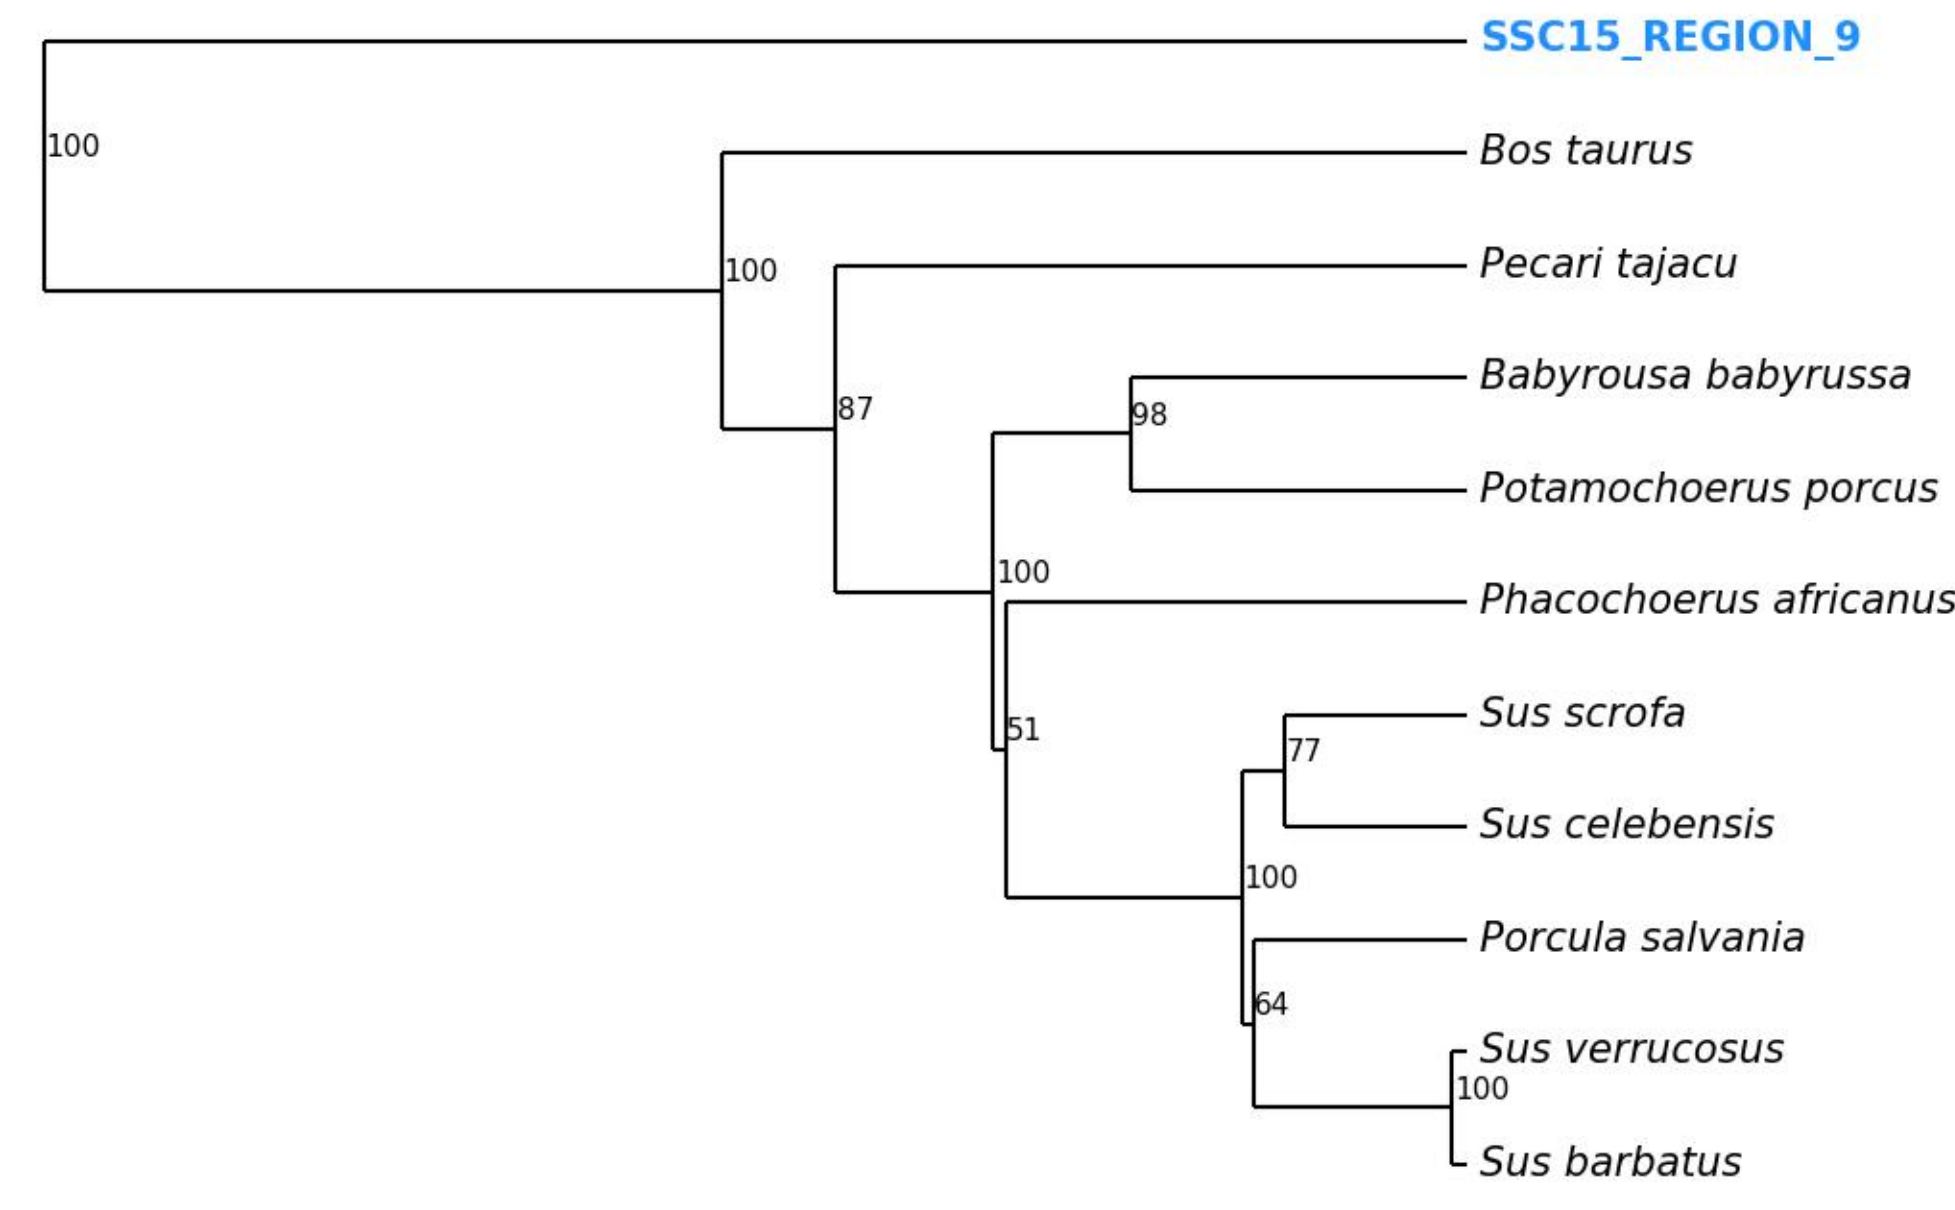

SSC15\_REGION\_10

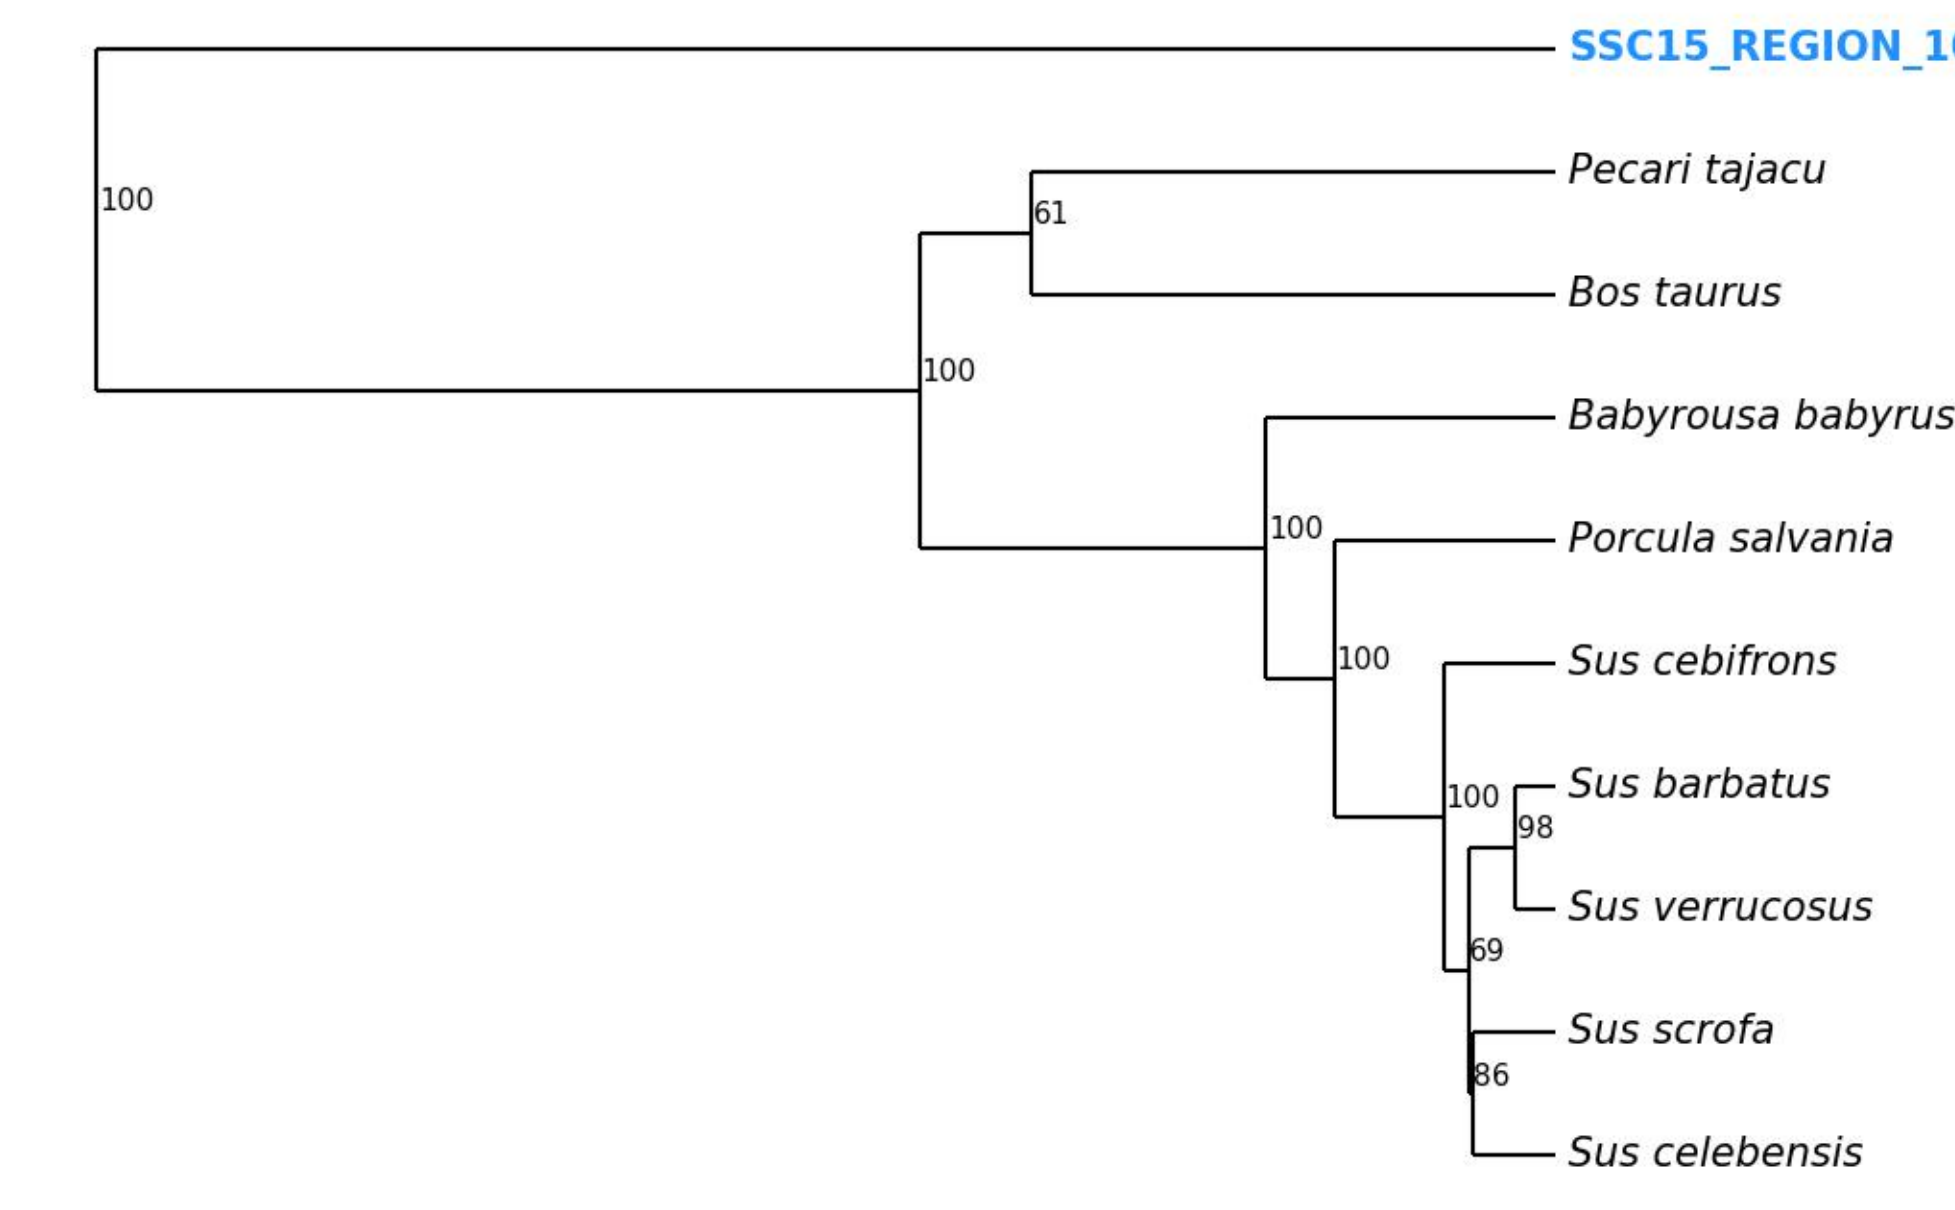

SSC15\_REGION\_11

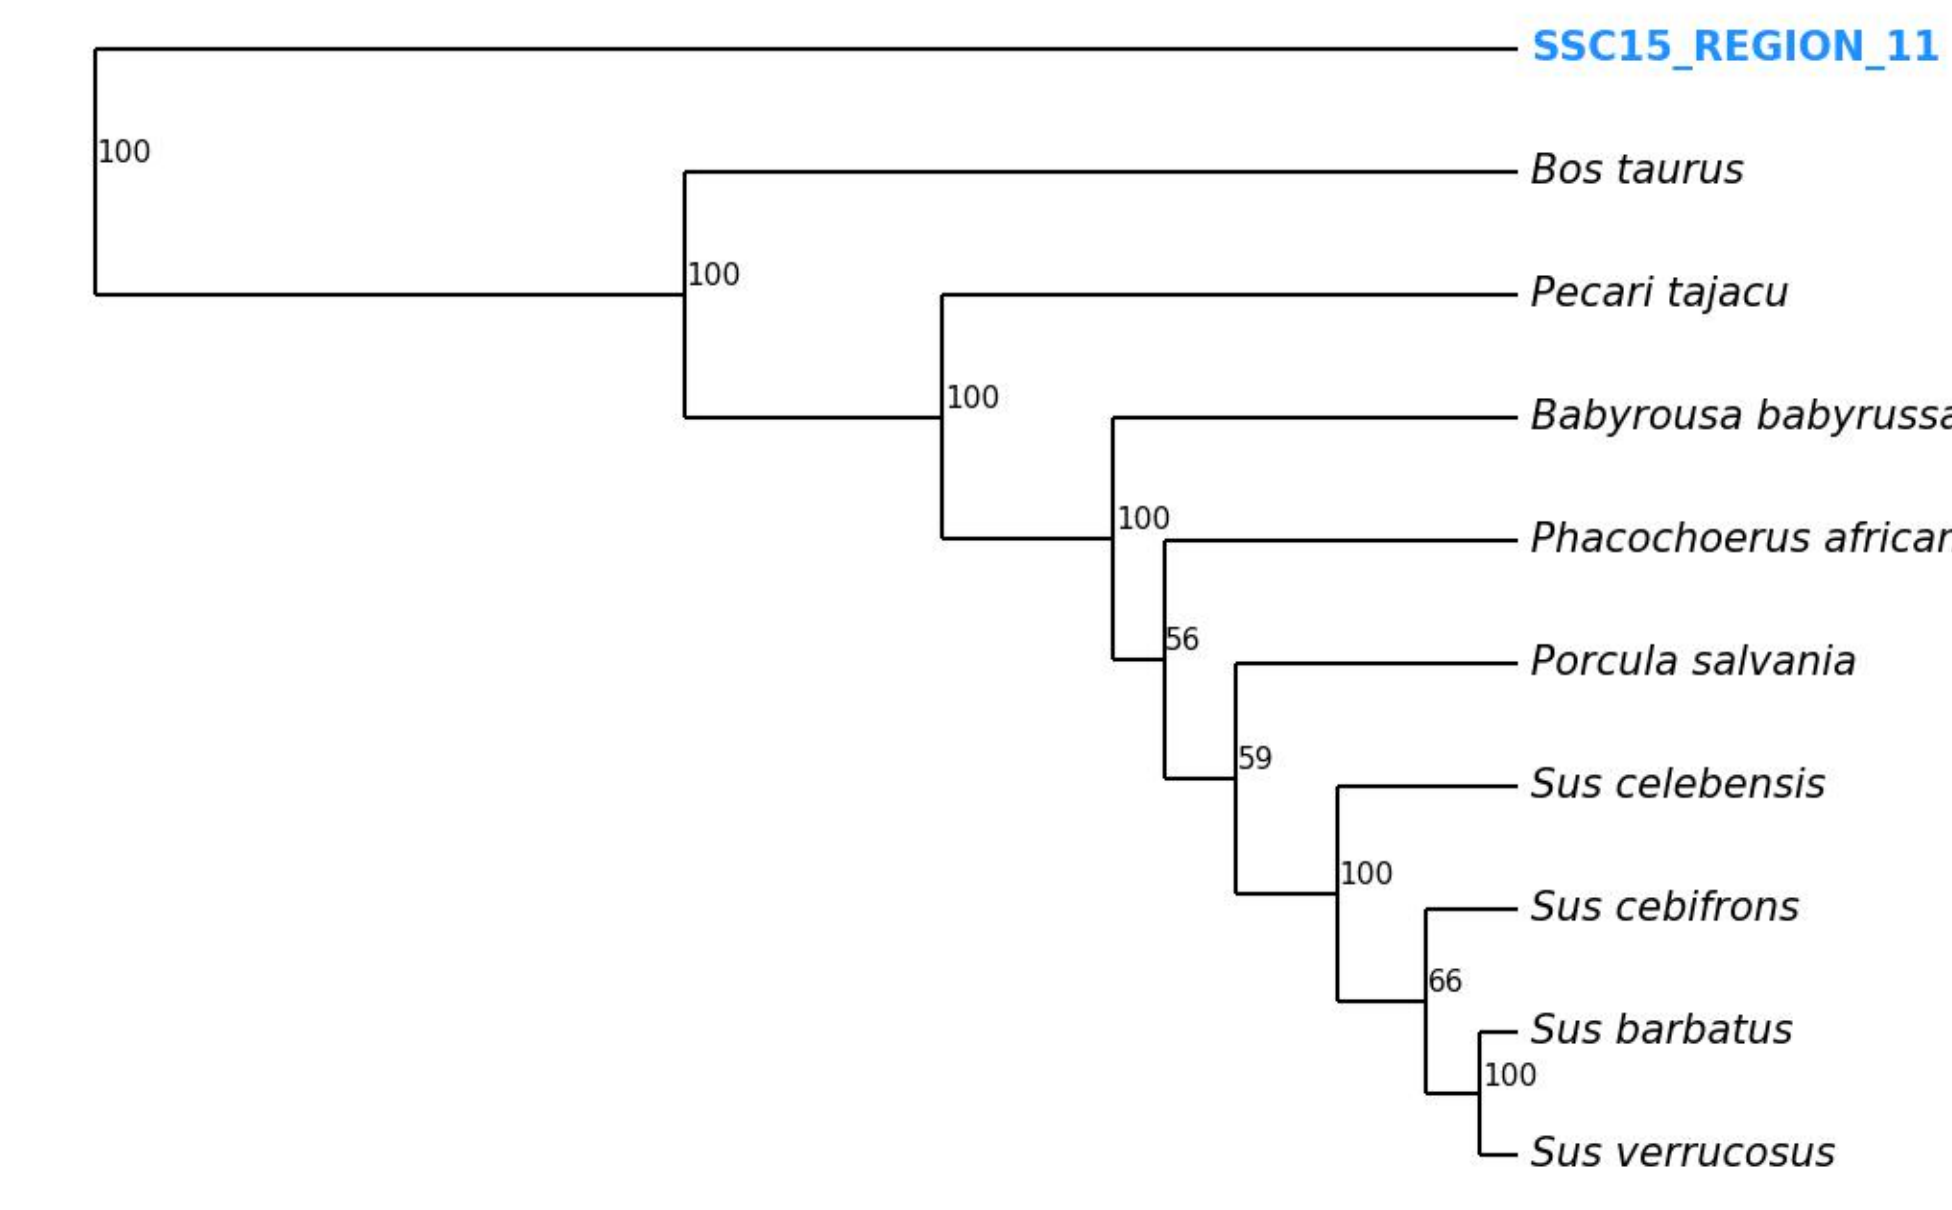

SSC15\_REGION\_12

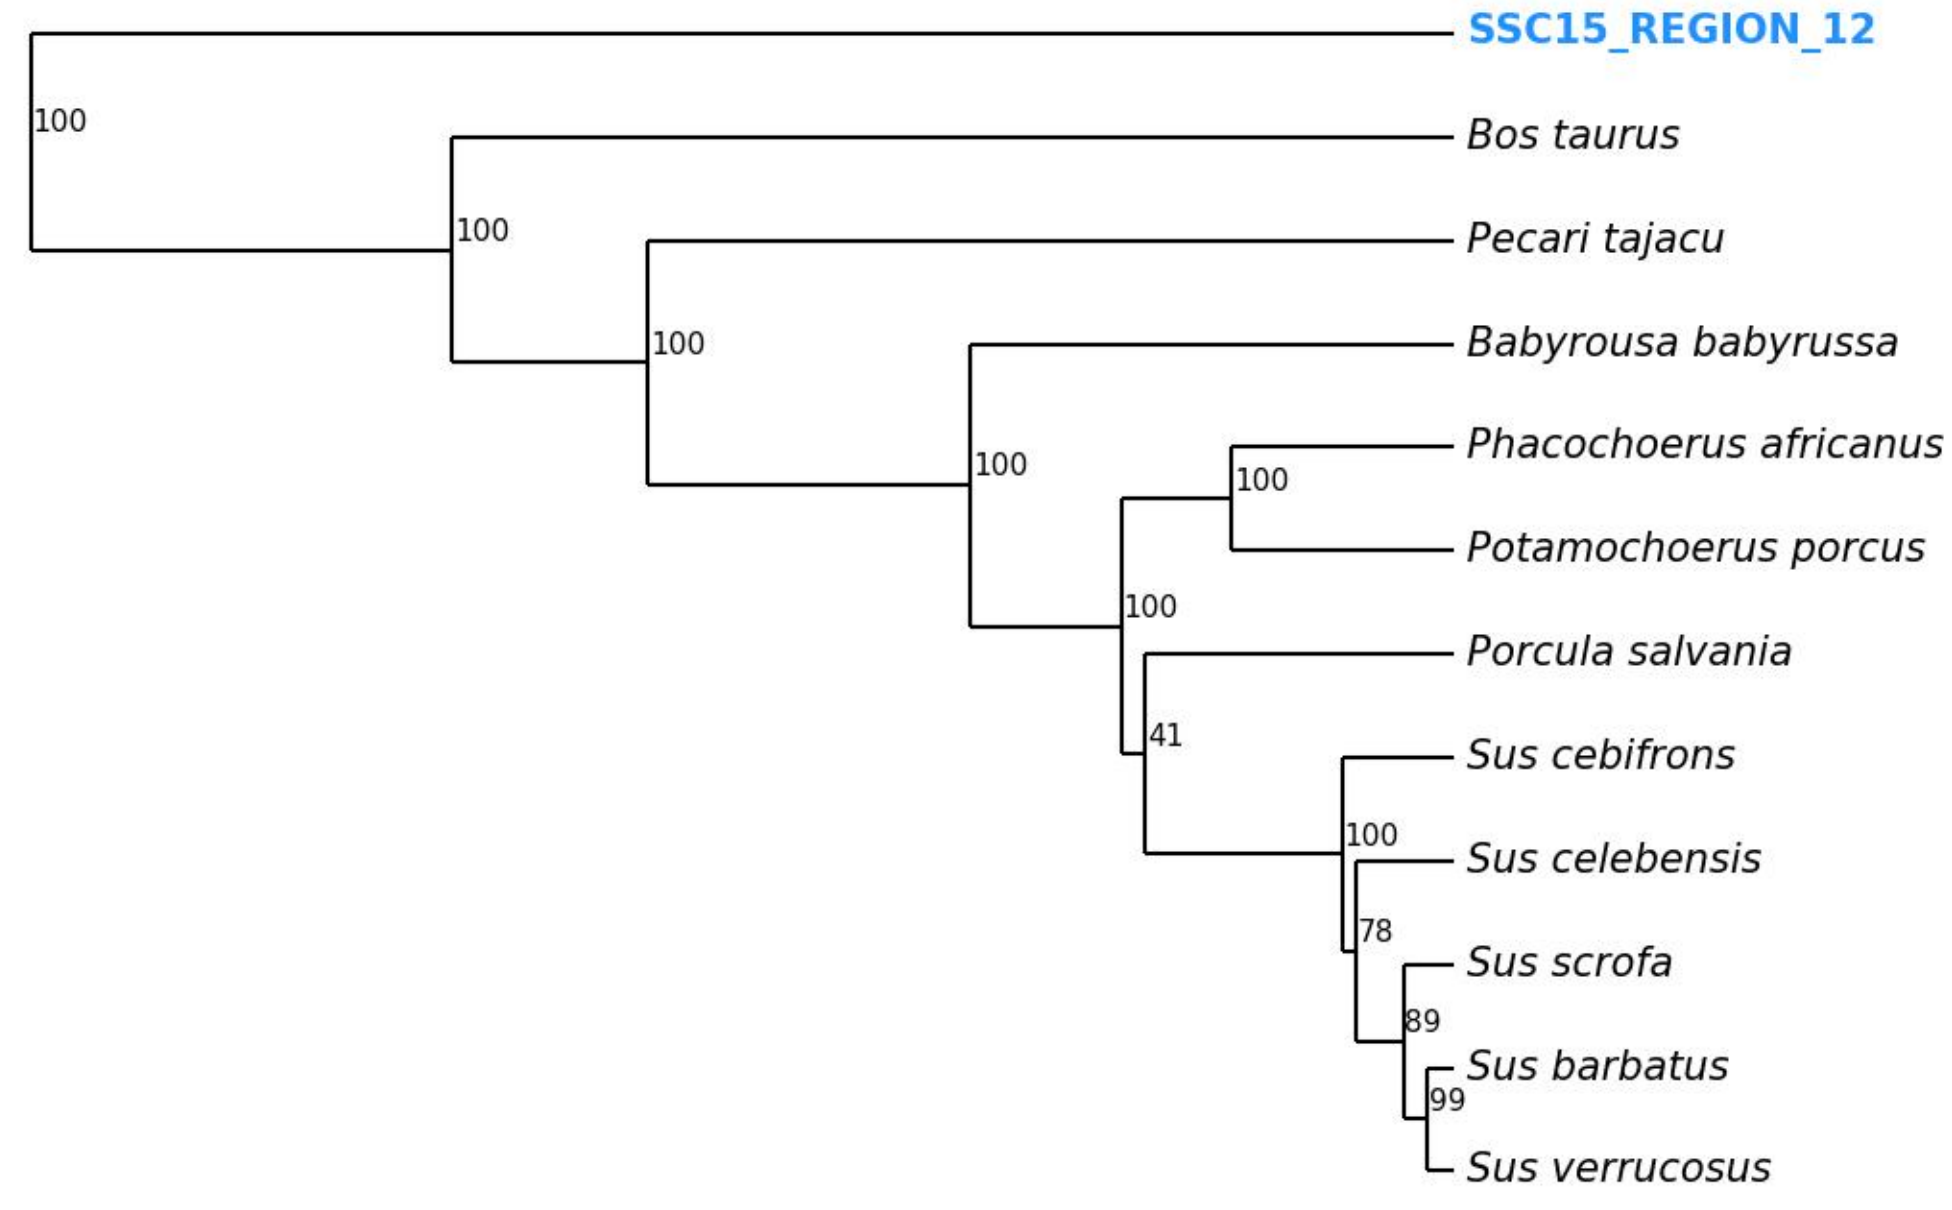

SSC15\_REGION\_14

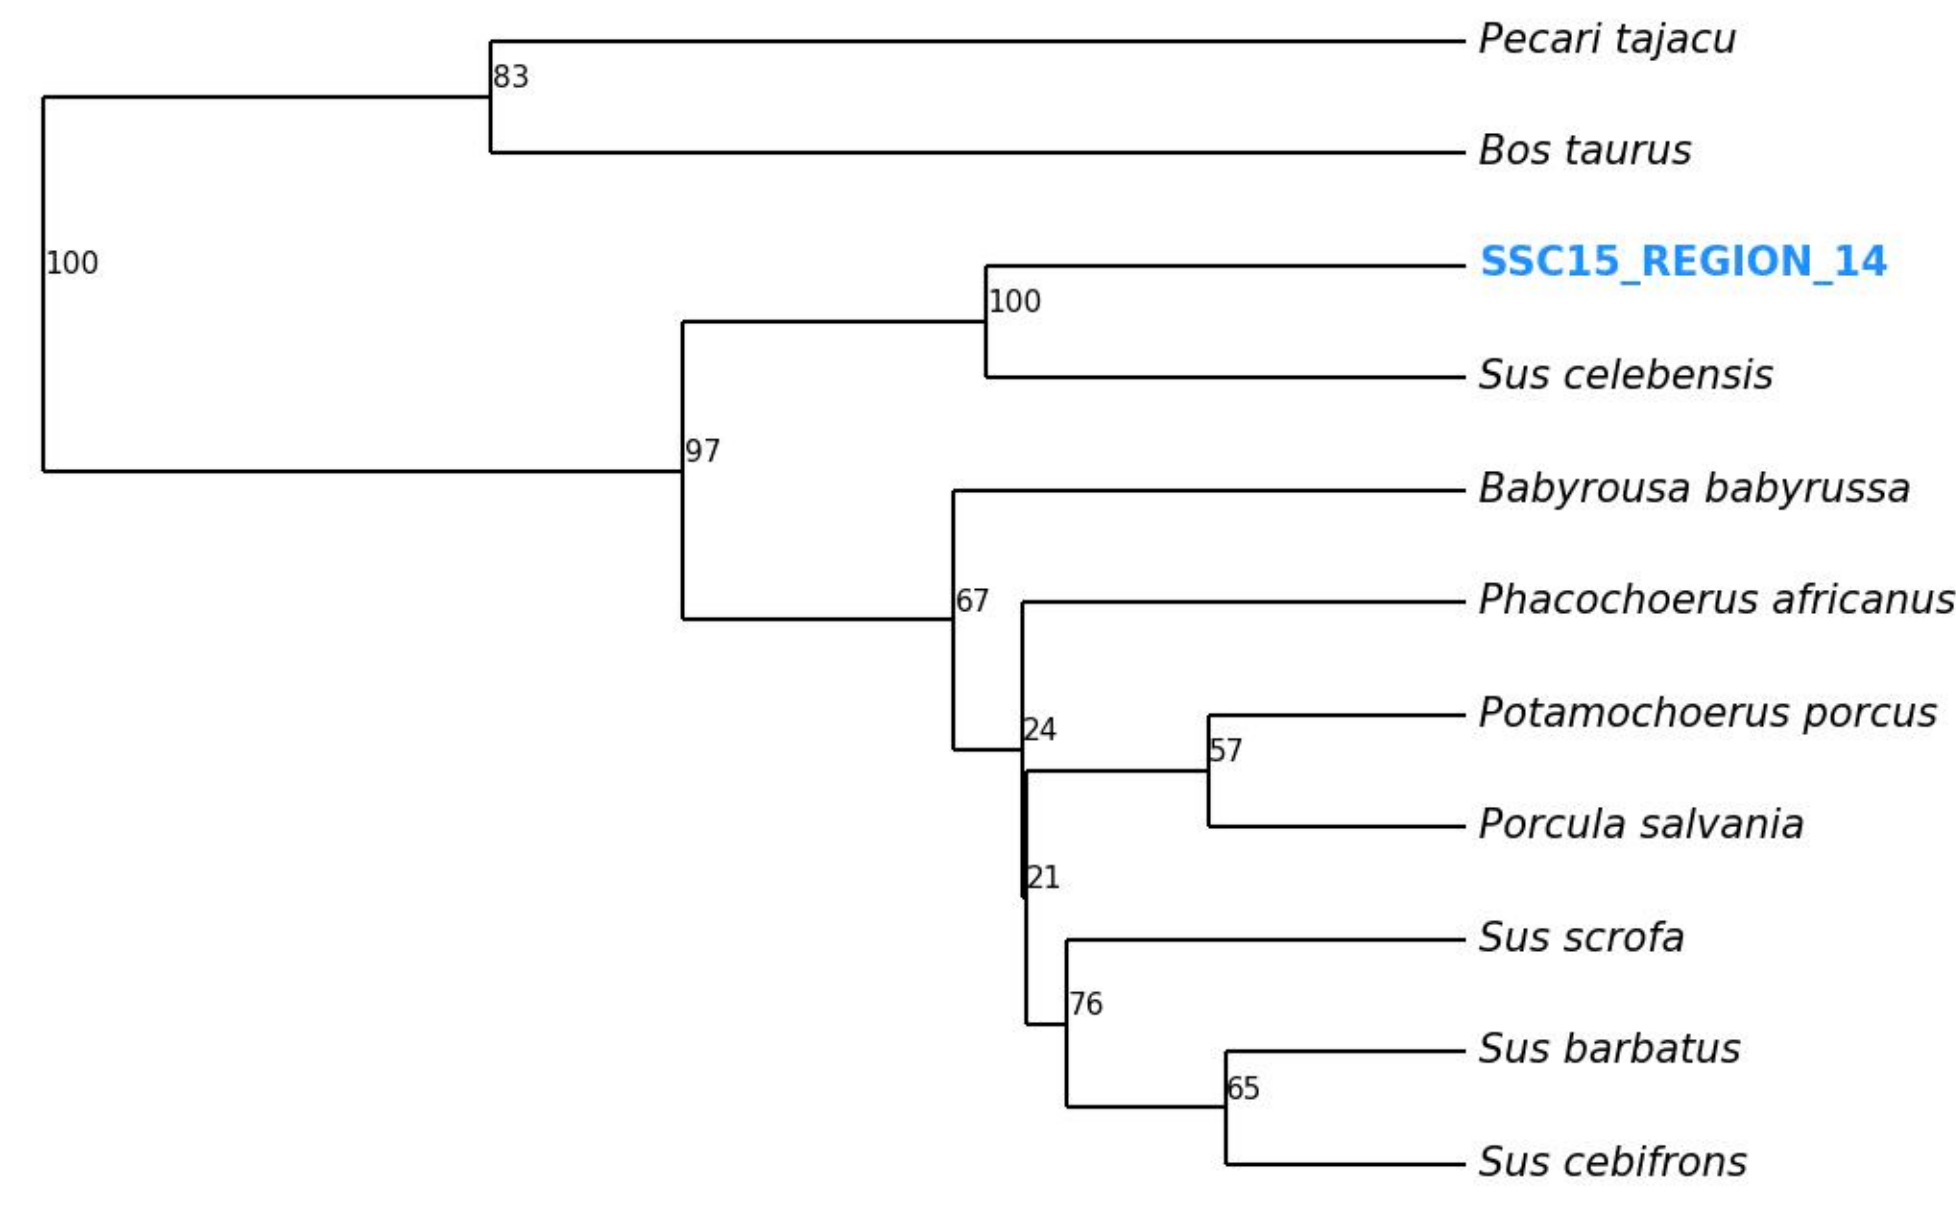

SSC15\_REGION\_15

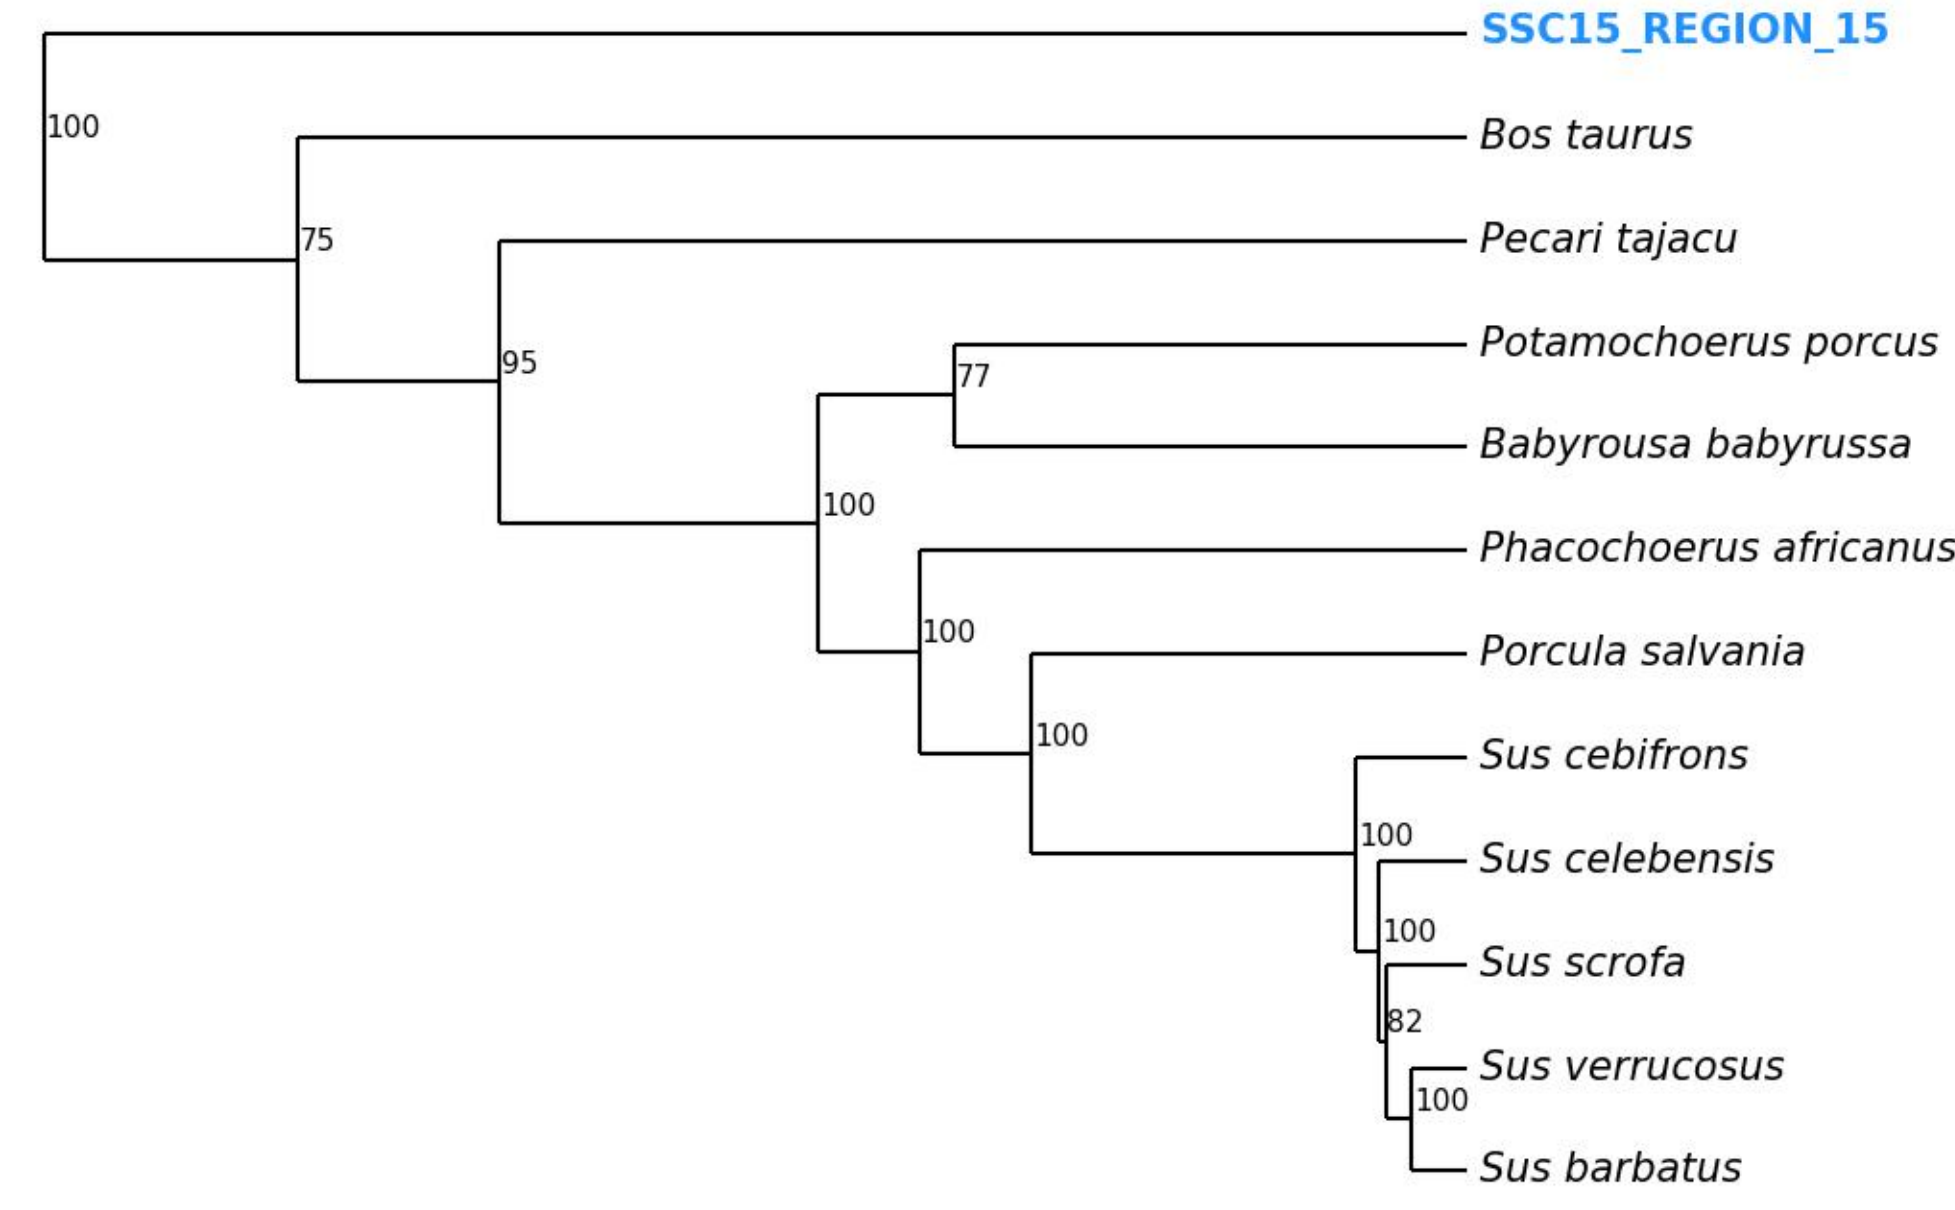

SSC15\_REGION\_16

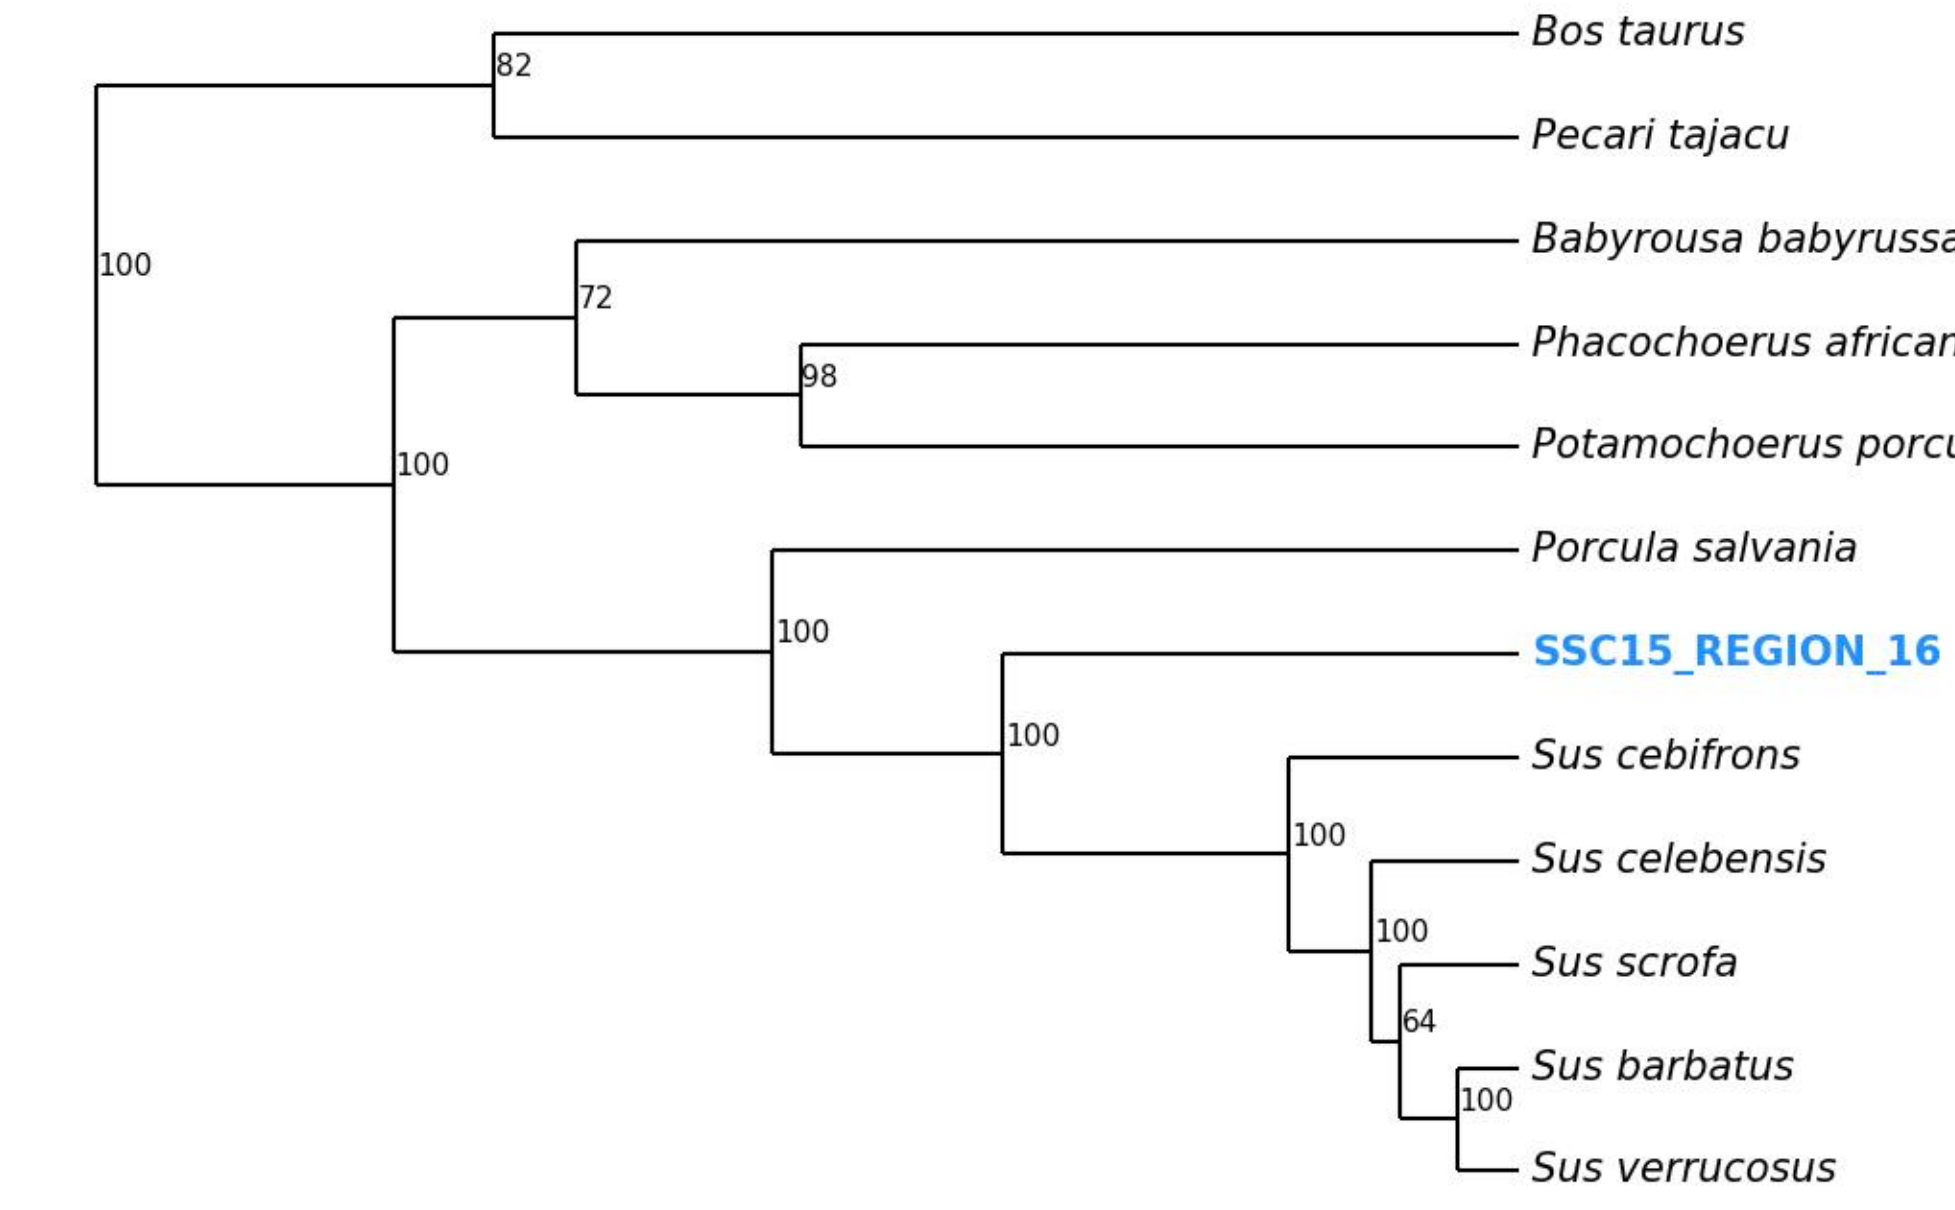

SSC15\_REGION\_17

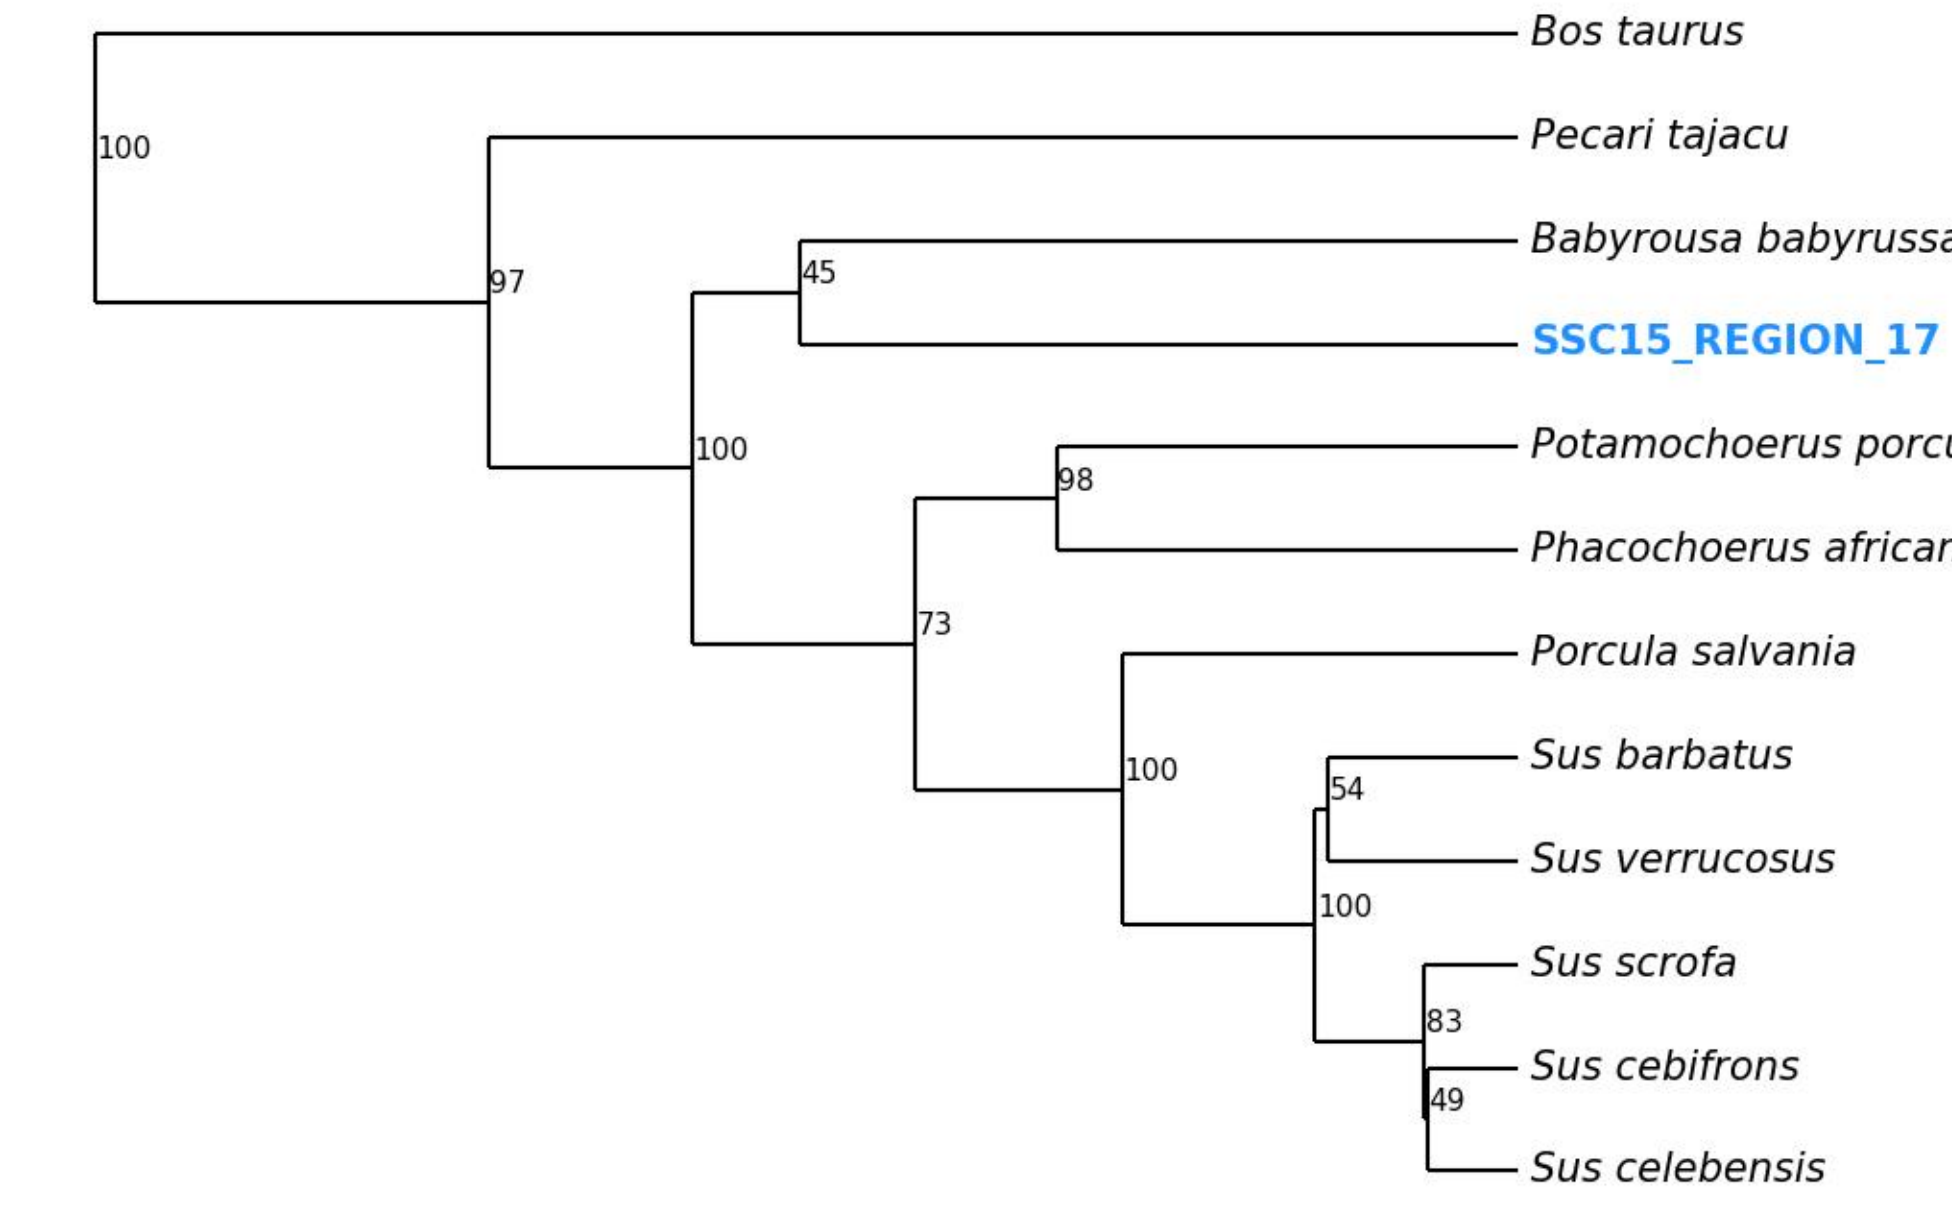

SSC15\_REGION\_21

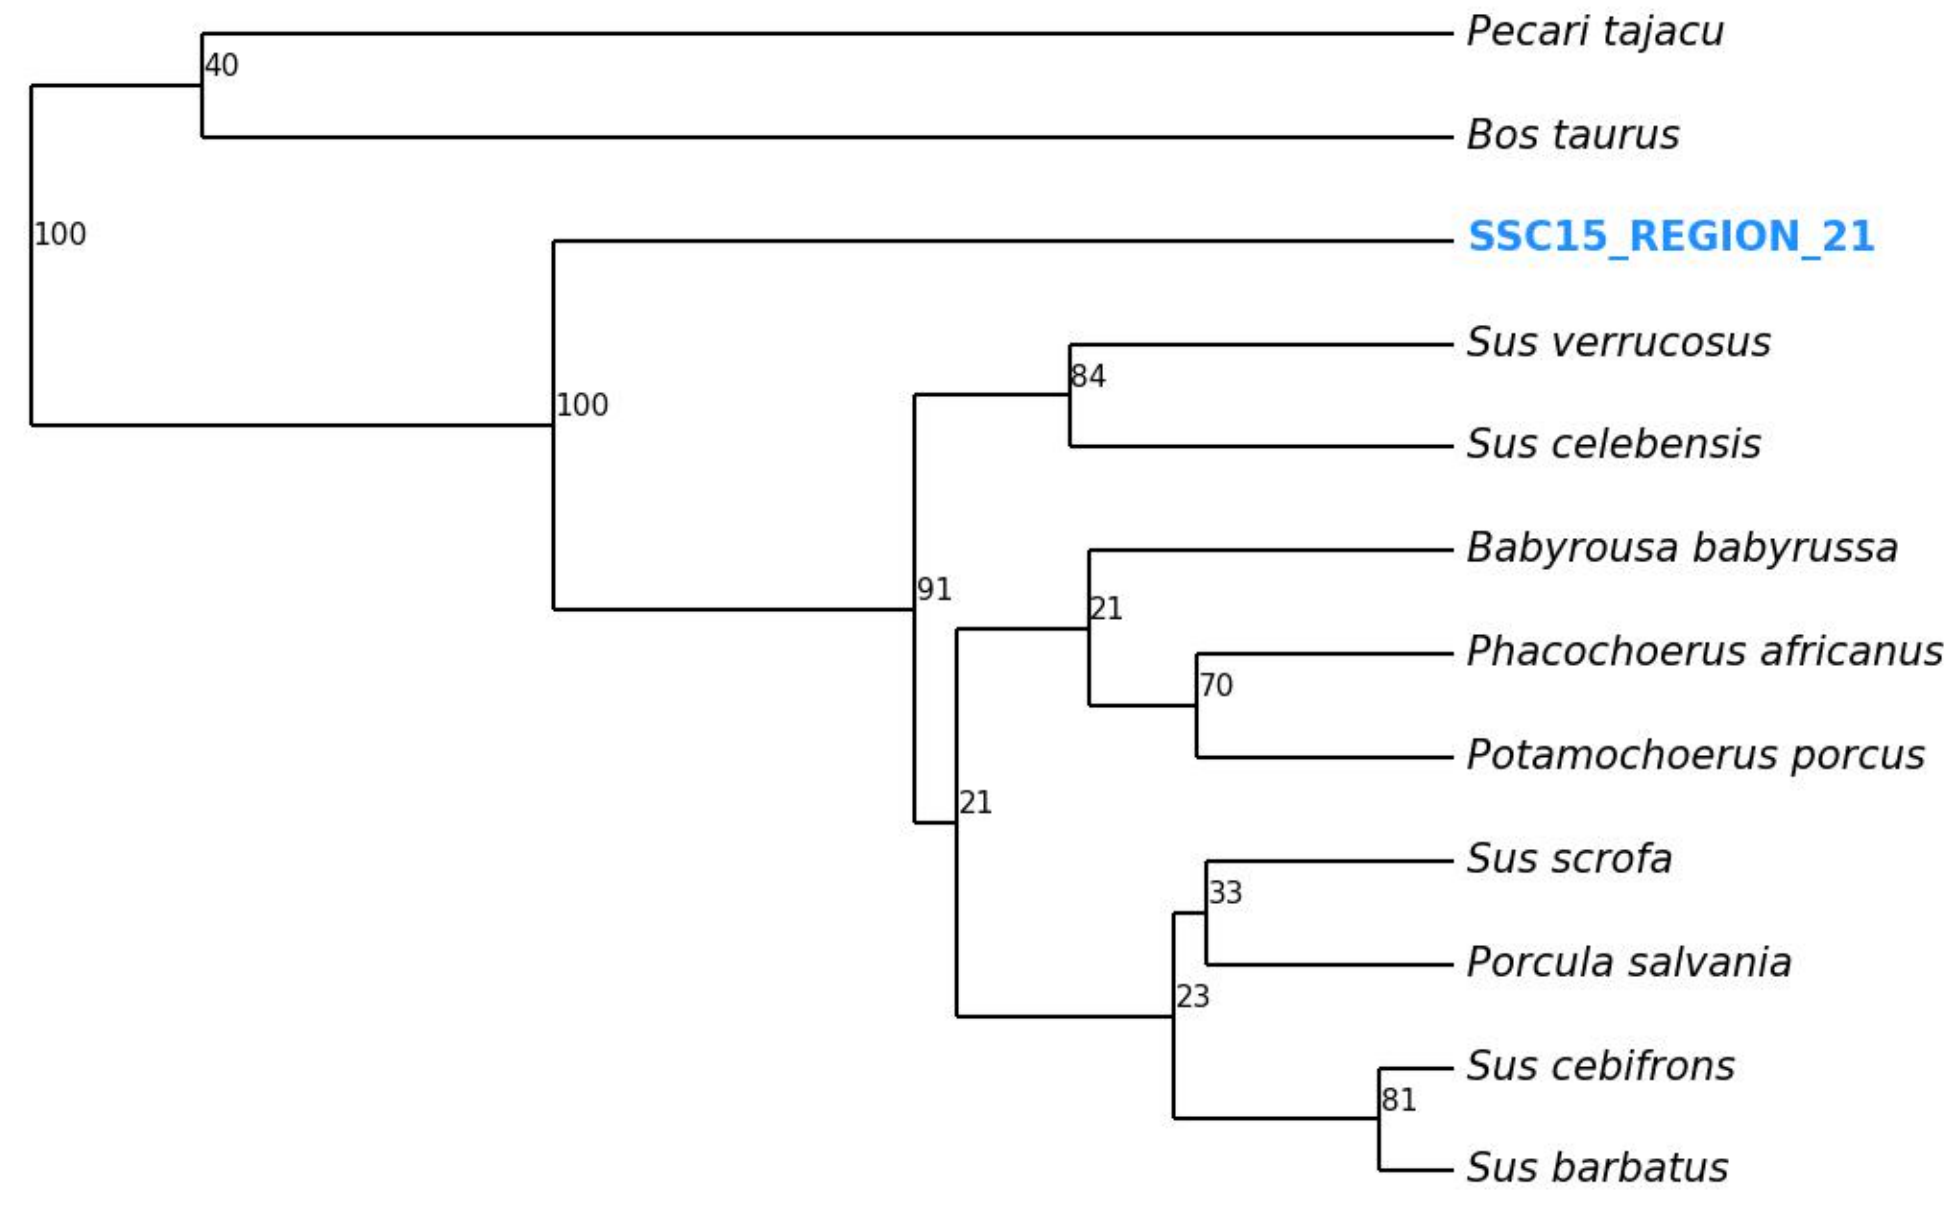

SSC15\_REGION\_22

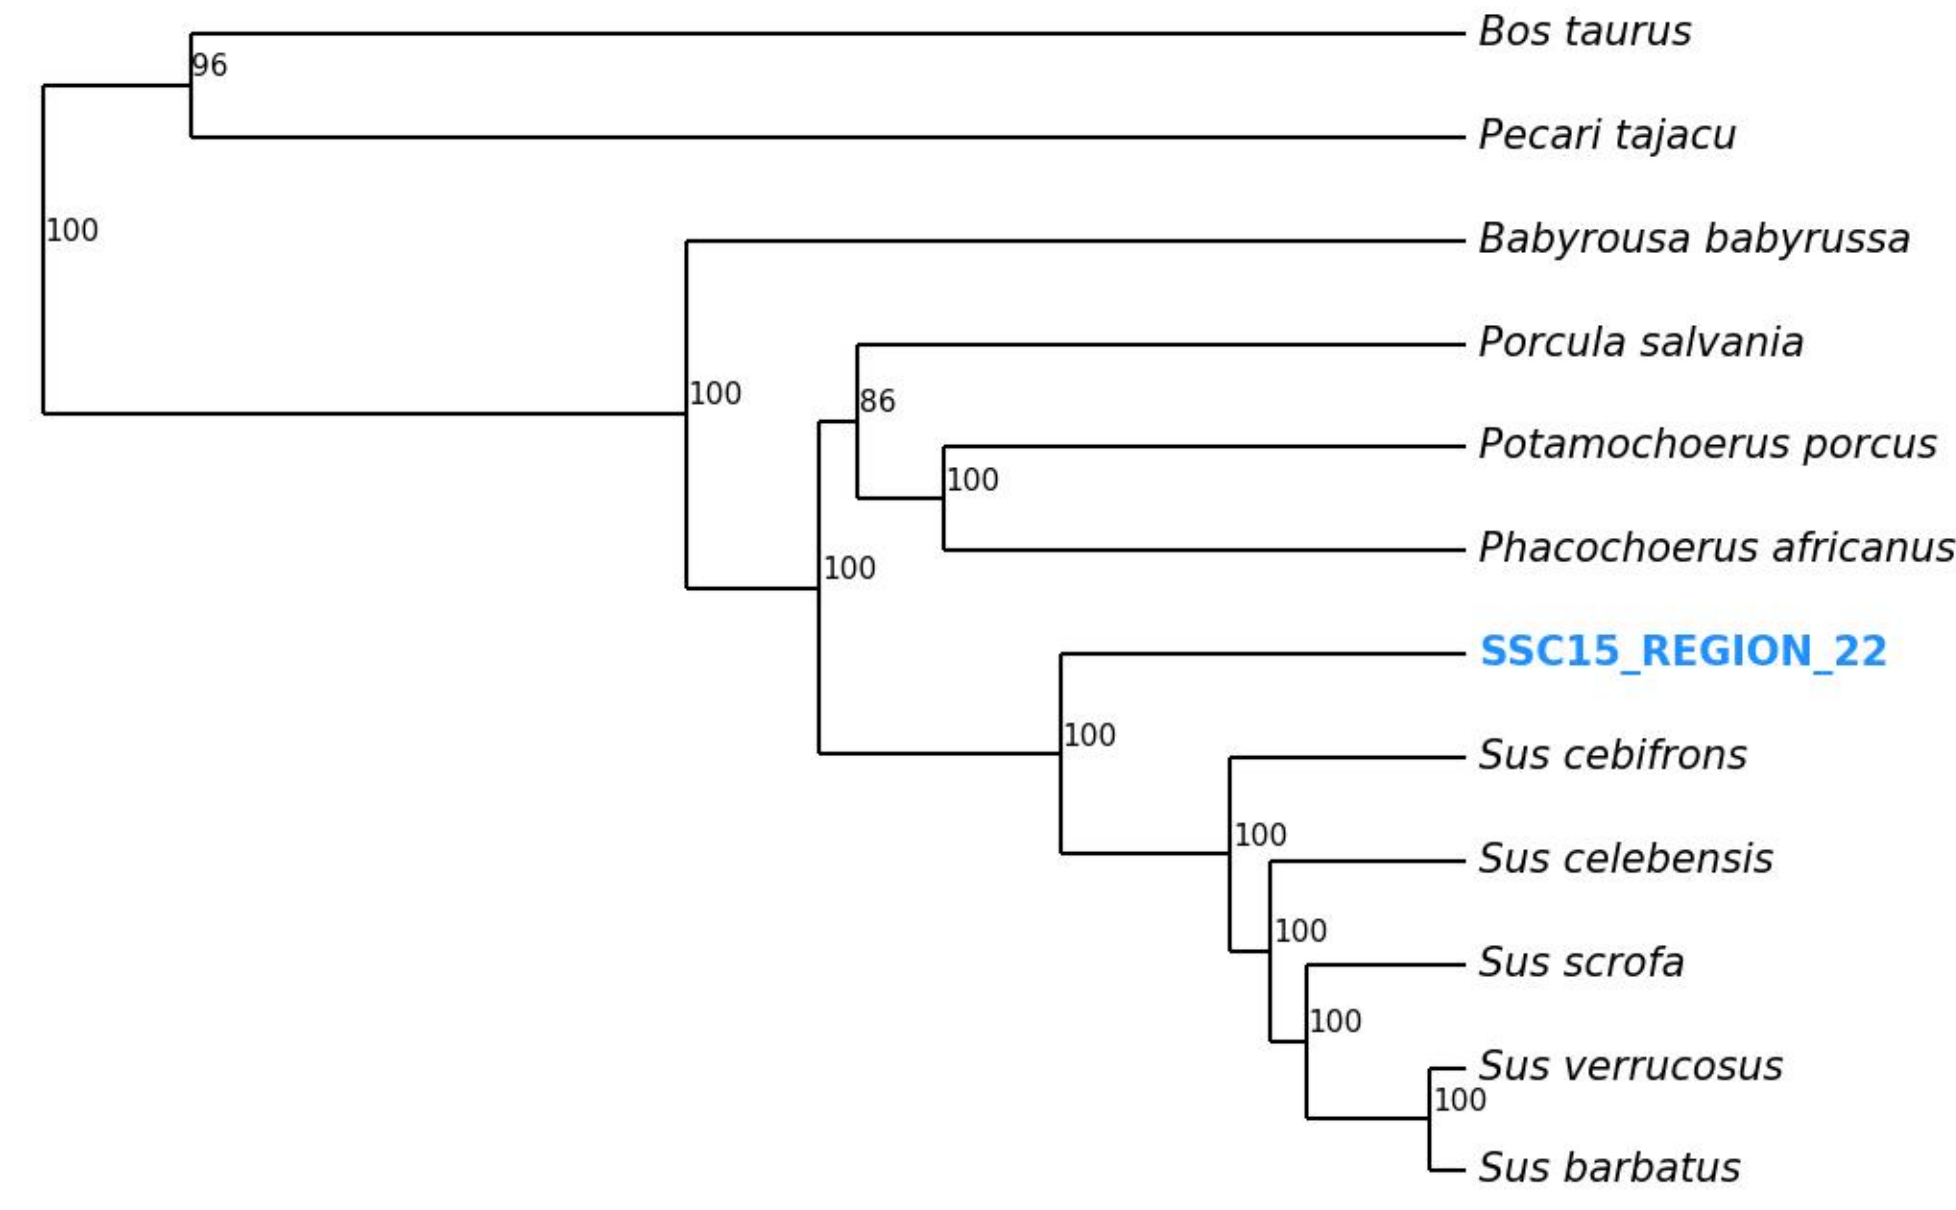

SSC15\_REGION\_24

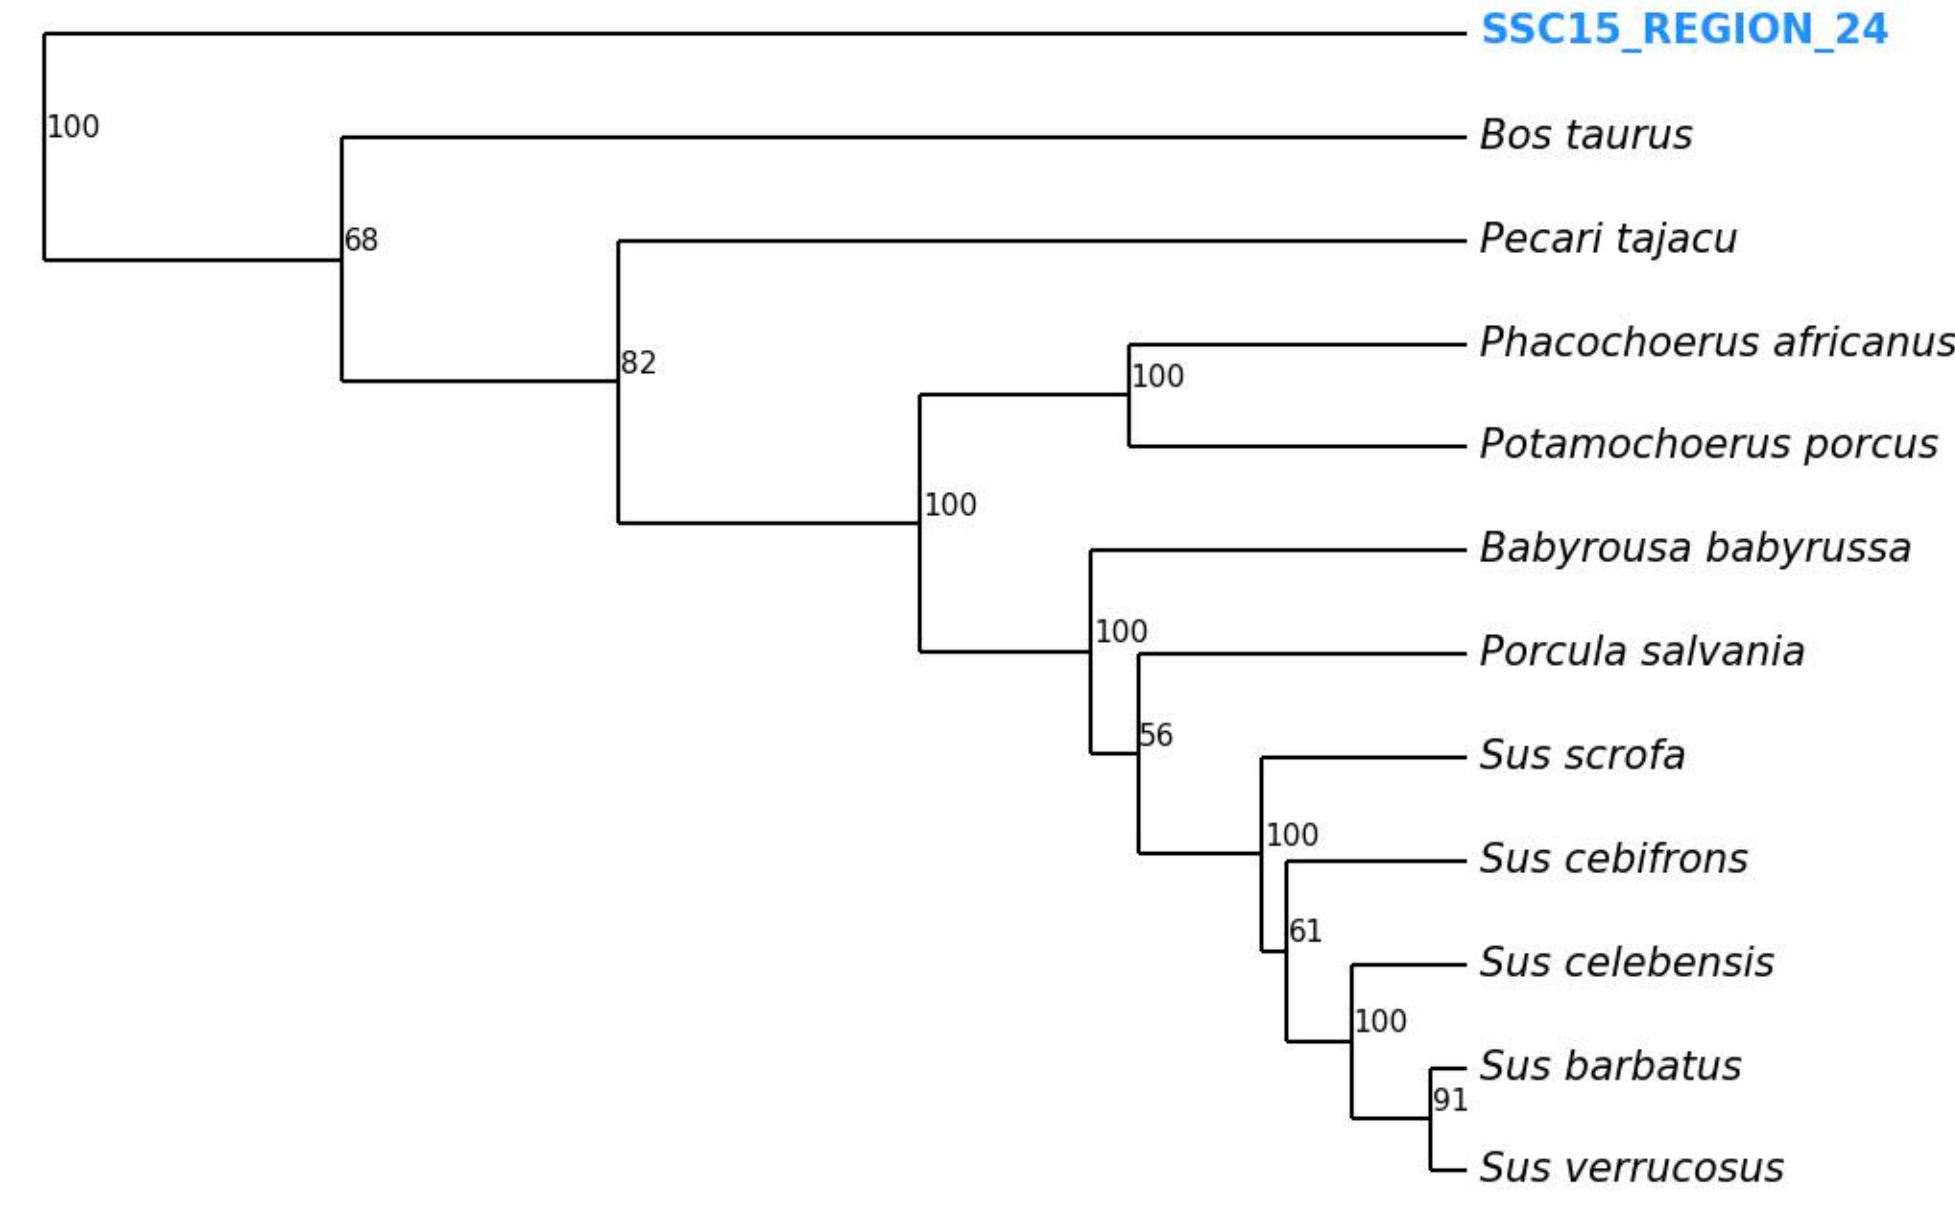

SSC16\_REGION\_2

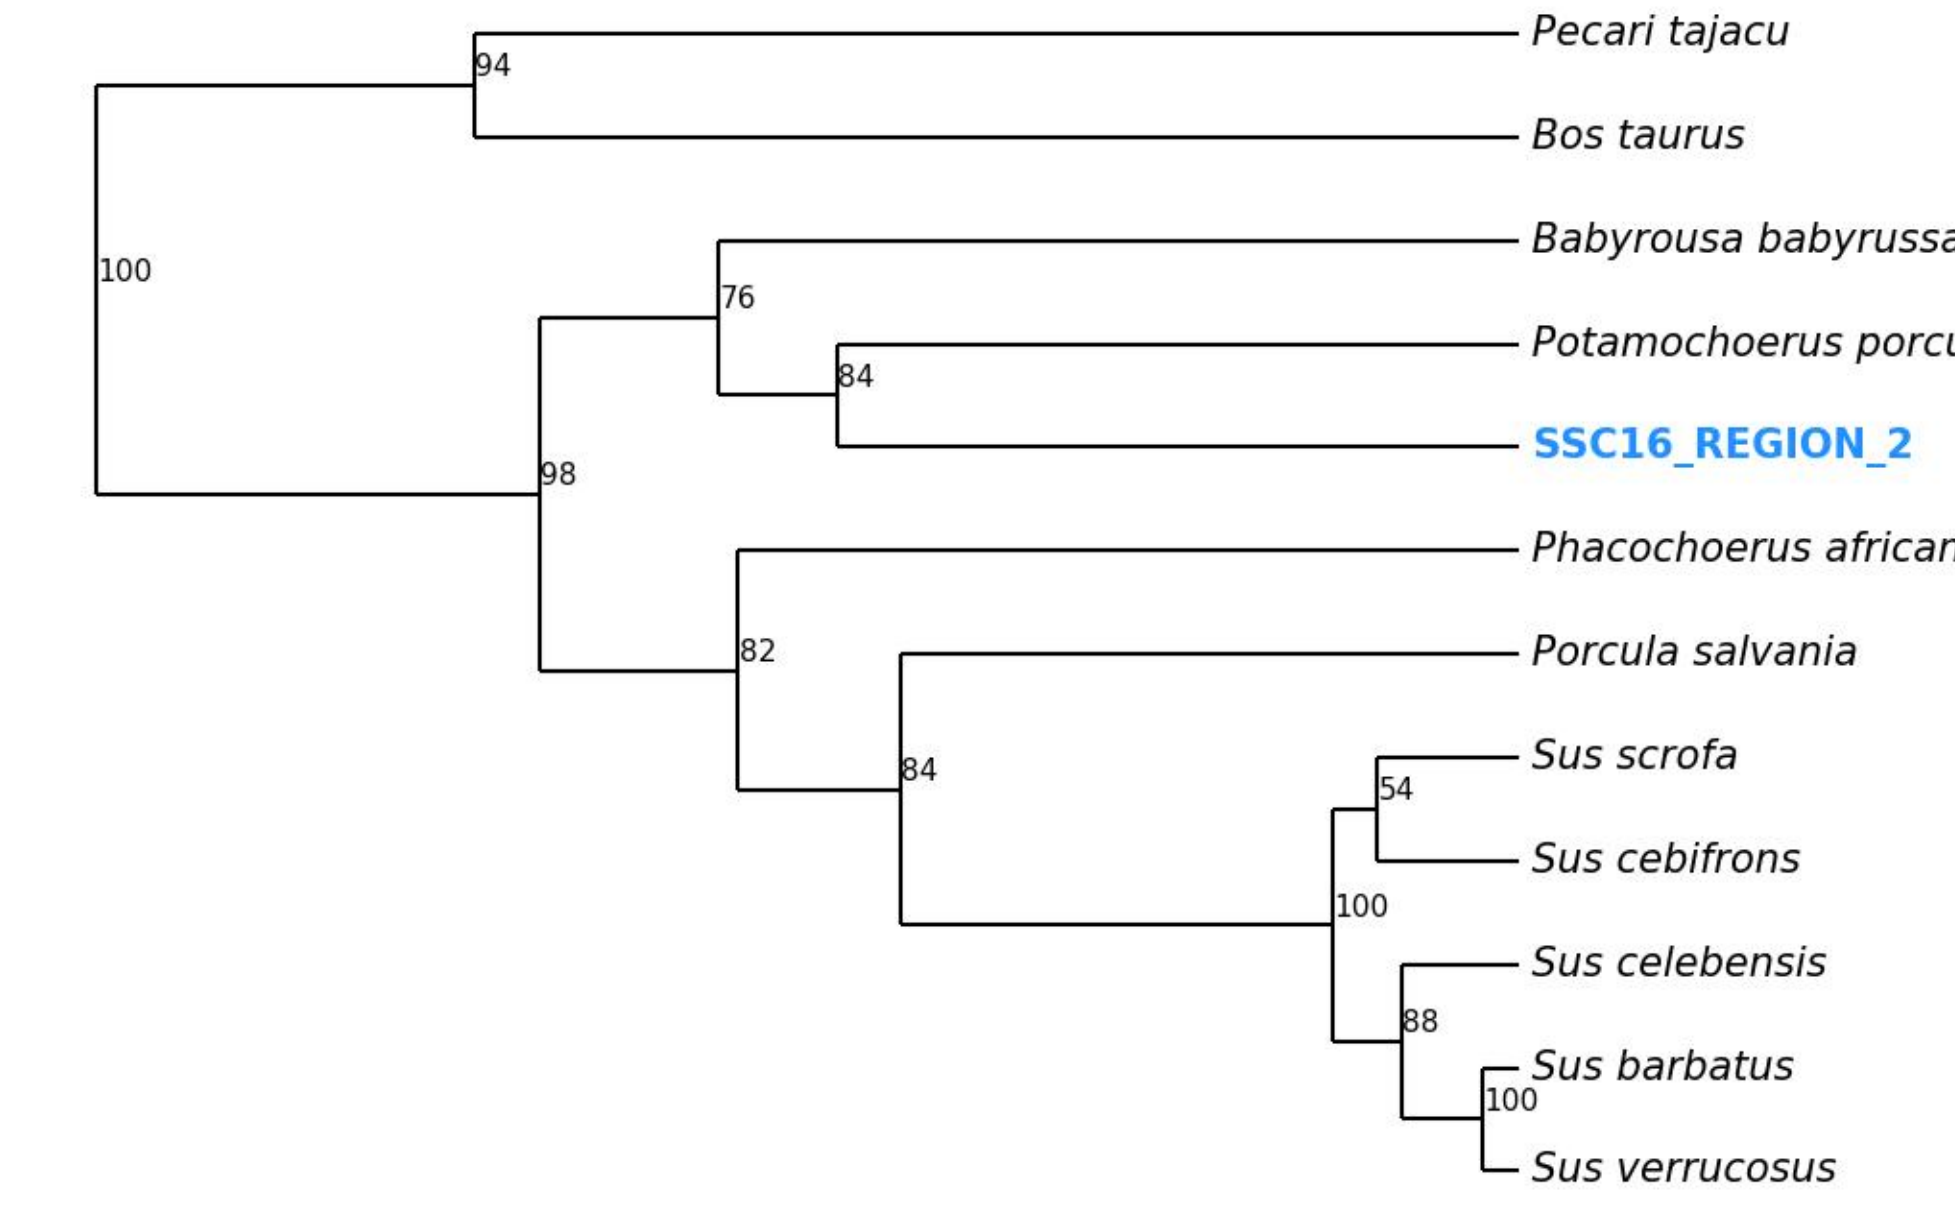

SSC16\_REGION\_4

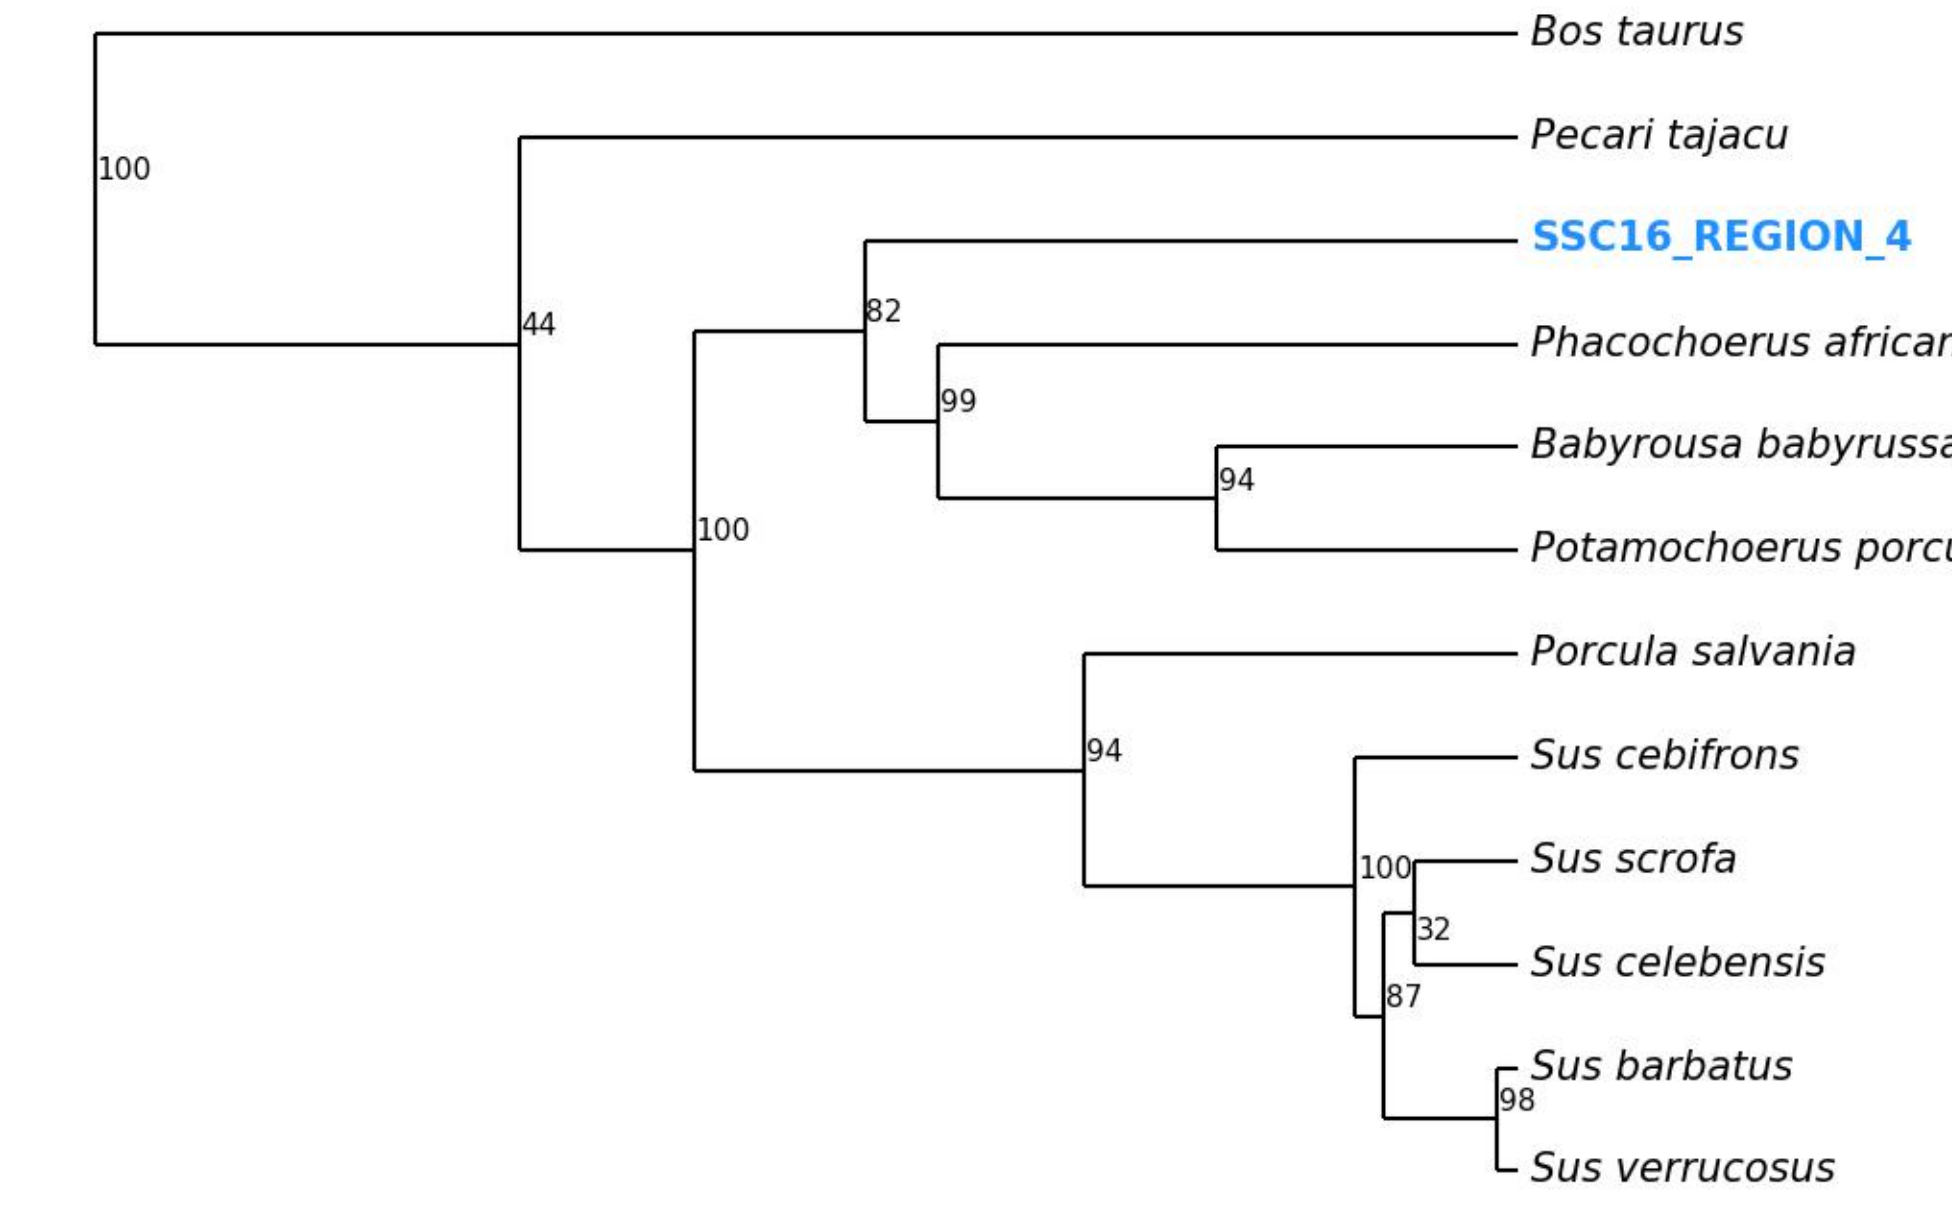

Supplement: MOESM4 [file 12711_2024_930_MOESM4_ESM.pdf]
